# Supplementary material for: Copper(i) complexes bearing pyrrole-bridged S,N and N-donor ligands as catalysts for tandem hydroamination–alkynylation: effect of anions on product formation
Source: Royal Society of Chemistry journal article supplement (doi:10.1039/d4dt01937g), 2024-01-01
Supplement: d4dt01937g1.pdf [file d4dt01937g1.pdf]

## Supplementary Information

Copper(I) Complexes Bearing the Pyrrole-Bridged *S,N* and *N*-Donor Ligands as Catalysts for the Tandem Hydroamination-Alkynylation:  
Effect of Anions on Product Formation

Munmun Mondal, and Ganesan Mani\*

Department of Chemistry, Indian Institute of Technology, Kharagpur,  
Kharagpur-721302, West Bengal, India.

1. X-ray structures and refinement data
2. Catalysis studies
3. Substrate scope data
4. NMR, HRMS and IR Spectra
5. References

## 1. X-ray structures and refinement data

The suitable single crystals of complexes **5-11a** were grown from the solvents mentioned in their respective experimental sections. Data collections were performed using a Bruker APEX-II or D8 Venture APEX3 CCD diffractometer with graphite monochromated Mo K $\alpha$  radiation ( $\lambda = 0.71073 \text{ \AA}$ ). The space group for every structure was obtained by XPREP program. The structures were solved by SHELXT<sup>1</sup> which successfully located most of the nonhydrogen atoms. Subsequently, least-squares refinements were carried out on  $F^2$  using SHELXL version 2018/3<sup>2</sup> to locate the remaining nonhydrogen atoms. Nonhydrogen atoms were refined with anisotropic displacement parameters. Hydrogen atoms attached to carbon atoms were fixed in calculated positions. For complex **11a**·CH<sub>2</sub>Cl<sub>2</sub>, the lattice CH<sub>2</sub>Cl<sub>2</sub> could not be modelled and hence it was squeezed using SQUEEZE/PLATON.<sup>3</sup> As a result, its cif file shows mismatch between the calculated and reported formulae. The PF<sub>6</sub><sup>-</sup> anion, SO<sub>2</sub> and phenyl rings are also disordered and they were successfully resolved using SADI, EADP, DFIX, SIMU, RIGU restraints. The refinement data for all the structures are summarized in Table S1 and Table S2. Crystallographic data were deposited with the Cambridge Crystallographic Data Centre, CCDC, 12 Union Road, Cambridge CB21EZ, UK. These data can be obtained free of charge upon quoting the depository numbers CCDC 2331548-2331554 and 2349043 from web interface (at <http://www.ccdc.cam.ac.uk>).

**Table S1.** Crystallographic data for complexes **5-8**.

|                                                                     | Complex 5                                                                                     | Complex 6                                                                                     | Complex 7                                                                                    | Complex 8                                                                                                       |
|---------------------------------------------------------------------|-----------------------------------------------------------------------------------------------|-----------------------------------------------------------------------------------------------|----------------------------------------------------------------------------------------------|-----------------------------------------------------------------------------------------------------------------|
| Empirical formula                                                   | C <sub>34</sub> H <sub>38</sub> Cl <sub>2</sub> Cu <sub>2</sub> N <sub>6</sub> S <sub>2</sub> | C <sub>34</sub> H <sub>38</sub> Br <sub>2</sub> Cu <sub>2</sub> N <sub>6</sub> S <sub>2</sub> | C <sub>34</sub> H <sub>38</sub> Cu <sub>2</sub> I <sub>2</sub> N <sub>6</sub> S <sub>2</sub> | C <sub>34</sub> H <sub>38</sub> Cu <sub>2</sub> Cl <sub>2</sub> N <sub>6</sub> O <sub>4</sub><br>S <sub>2</sub> |
| Formula weight                                                      | 792.80                                                                                        | 881.72                                                                                        | 975.70                                                                                       | 856.80                                                                                                          |
| Wavelength (Å)                                                      | 0.71073                                                                                       | 0.71073                                                                                       | 0.71073                                                                                      | 0.71073                                                                                                         |
| Temperature (K)                                                     | 296(2)                                                                                        | 150(2)                                                                                        | 296(2)                                                                                       | 296(2)                                                                                                          |
| Crystal system                                                      | Triclinic                                                                                     | Triclinic                                                                                     | Triclinic                                                                                    | Triclinic                                                                                                       |
| Space group                                                         | $\bar{P}1$                                                                                    | $\bar{P}1$                                                                                    | $\bar{P}1$                                                                                   | $\bar{P}1$                                                                                                      |
| <i>a</i> /Å                                                         | 7.819(5)                                                                                      | 7.7907(9)                                                                                     | 7.9902(3)                                                                                    | 8.623(2)                                                                                                        |
| <i>b</i> /Å                                                         | 10.872(6)                                                                                     | 10.8092(12)                                                                                   | 10.9861(5)                                                                                   | 9.240(2)                                                                                                        |
| <i>c</i> /Å                                                         | 11.705                                                                                        | 11.6165(14)                                                                                   | 11.7073(5)                                                                                   | 12.560(3)                                                                                                       |
| $\alpha$ /degree                                                    | 70.240(18)                                                                                    | 70.825(7)                                                                                     | 70.051(2)                                                                                    | 88.202(9)                                                                                                       |
| $\beta$ /degree                                                     | 72.284(19)                                                                                    | 72.813(8)                                                                                     | 75.137(2)                                                                                    | 71.740(8)                                                                                                       |
| $\gamma$ /degree                                                    | 77.609(18)                                                                                    | 80.038(8)                                                                                     | 82.751(2)                                                                                    | 75.243(9)                                                                                                       |
| Volume (Å <sup>3</sup> )                                            | 885.0(9)                                                                                      | 879.58(18)                                                                                    | 932.85(7)                                                                                    | 917.8(4)                                                                                                        |
| <i>Z</i>                                                            | 1                                                                                             | 1                                                                                             | 1                                                                                            | 1                                                                                                               |
| <i>D</i> <sub>calcd</sub> , mg m <sup>-3</sup>                      | 1.488                                                                                         | 1.665                                                                                         | 1.737                                                                                        | 1.550                                                                                                           |
| $\mu$ /mm <sup>-1</sup>                                             | 1.504                                                                                         | 3.633                                                                                         | 2.939                                                                                        | 1.465                                                                                                           |
| <i>F</i> (000)                                                      | 408                                                                                           | 444                                                                                           | 480                                                                                          | 440                                                                                                             |
| $\theta$ range (degree)                                             | 2.330 to 27.239                                                                               | 2.746 to 28.580                                                                               | 2.257 to 33.142                                                                              | 2.282 to 30.087                                                                                                 |
| Data/restr/params.                                                  | 3778 / 0 / 212                                                                                | 4449 / 0 / 212                                                                                | 7012 / 0 / 212                                                                               | 5316 / 0 / 230                                                                                                  |
| GOF ( <i>F</i> <sup>2</sup> )                                       | 1.037                                                                                         | 1.028                                                                                         | 1.082                                                                                        | 1.045                                                                                                           |
| Limiting Indices                                                    | -10 ≤ <i>h</i> ≤ 10<br>-13 ≤ <i>k</i> ≤ 13<br>-12 ≤ <i>l</i> ≤ 14                             | -8 ≤ <i>h</i> ≤ 10<br>-14 ≤ <i>k</i> ≤ 13<br>-15 ≤ <i>l</i> ≤ 15                              | -12 ≤ <i>h</i> ≤ 12<br>-16 ≤ <i>k</i> ≤ 15<br>-18 ≤ <i>l</i> ≤ 17                            | -12 ≤ <i>h</i> ≤ 12<br>-13 ≤ <i>k</i> ≤ 13<br>-17 ≤ <i>l</i> ≤ 17                                               |
| <i>R</i> <sub>1</sub> , <i>wR</i> <sub>2</sub>                      | 0.0805, 0.2088                                                                                | 0.0535, 0.0825                                                                                | 0.0325, 0.0694                                                                               | 0.0533, 0.1292                                                                                                  |
| R indices (all data) <i>R</i> <sub>1</sub> , <i>wR</i> <sub>2</sub> | 0.1351, 0.2718                                                                                | 0.1086, 0.1048                                                                                | 0.0480, 0.0775                                                                               | 0.0925, 0.1518                                                                                                  |
| Largest different peak and hole (e Å <sup>-3</sup> )                | 0.957 and -1.025                                                                              | 0.660, -0.703                                                                                 | 0.729, -0.853                                                                                | 1.248, -0.866                                                                                                   |

**Table S2.** Crystallographic data for complexes **9-11a** and morpholinium copper(I) salt.

|                                                      | Complex <b>9</b>                                                                 | Complex <b>10</b>                                                               | Complex <b>11a</b> ·CH <sub>2</sub> Cl <sub>2</sub>                                                            | [C <sub>4</sub> H <sub>10</sub> NO] <sub>4</sub> <sup>+</sup> [Cu <sub>2</sub> Cl <sub>6</sub> ] <sup>4-</sup> |
|------------------------------------------------------|----------------------------------------------------------------------------------|---------------------------------------------------------------------------------|----------------------------------------------------------------------------------------------------------------|----------------------------------------------------------------------------------------------------------------|
| Empirical formula                                    | C <sub>34</sub> H <sub>38</sub> CuBrN <sub>6</sub> O <sub>4</sub> S <sub>2</sub> | C <sub>34</sub> H <sub>38</sub> CuIN <sub>6</sub> O <sub>4</sub> S <sub>2</sub> | C <sub>35</sub> H <sub>40</sub> Cl <sub>2</sub> CuF <sub>6</sub> N <sub>6</sub> O <sub>4</sub> PS <sub>2</sub> | C <sub>16</sub> H <sub>40</sub> Cl <sub>6</sub> Cu <sub>2</sub> N <sub>4</sub> O <sub>4</sub>                  |
| Formula weight                                       | 802.27                                                                           | 849.26                                                                          | 952.26                                                                                                         | 692.30                                                                                                         |
| Wavelength (Å)                                       | 0.71073                                                                          | 0.71073                                                                         | 0.71073                                                                                                        | 0.71073                                                                                                        |
| Temperature (K)                                      | 296(2)                                                                           | 296(2)                                                                          | 150(2)                                                                                                         | 120(2)                                                                                                         |
| Crystal system                                       | Monoclinic                                                                       | Monoclinic                                                                      | Triclinic                                                                                                      | Monoclinic                                                                                                     |
| Space group                                          | <i>C2/c</i>                                                                      | <i>C2/c</i>                                                                     | <i>p</i> $\bar{1}$                                                                                             | <i>P2</i> <sub>1</sub> / <i>c</i>                                                                              |
| <i>a</i> /Å                                          | 13.3242(11)                                                                      | 13.3756(11)                                                                     | 12.8983(7)                                                                                                     | 9.5628(3)                                                                                                      |
| <i>b</i> /Å                                          | 11.9239(11)                                                                      | 12.0339(11)                                                                     | 18.2783(11)                                                                                                    | 17.6110(6)                                                                                                     |
| <i>c</i> /Å                                          | 22.9313(17)                                                                      | 23.0349(18)                                                                     | 20.3179(11)                                                                                                    | 8.4952(2)                                                                                                      |
| <i>α</i> /degree                                     | 90                                                                               | 90                                                                              | 74.971(2)                                                                                                      | 90                                                                                                             |
| <i>β</i> /degree                                     | 100.561(4)                                                                       | 100.211(7)                                                                      | 71.551(2)                                                                                                      | 97.1890(10)                                                                                                    |
| <i>γ</i> /degree                                     | 90                                                                               | 90                                                                              | 69.355(2)                                                                                                      | 90                                                                                                             |
| Volume (Å <sup>3</sup> )                             | 3581.5(5)                                                                        | 3649.0(5)                                                                       | 4192.8(4)                                                                                                      | 1419.43(7)                                                                                                     |
| <i>Z</i>                                             | 4                                                                                | 4                                                                               | 4                                                                                                              | 2                                                                                                              |
| <i>D</i> <sub>calcd</sub> , mg m <sup>-3</sup>       | 1.488                                                                            | 1.546                                                                           | 1.509                                                                                                          | 1.620                                                                                                          |
| <i>μ</i> /mm <sup>-1</sup>                           | 1.888                                                                            | 1.604                                                                           | 0.858                                                                                                          | 2.092                                                                                                          |
| <i>F</i> (000)                                       | 1648                                                                             | 1720                                                                            | 1952                                                                                                           | 712                                                                                                            |
| <i>θ</i> range (degree)                              | 2.310 to 30.628                                                                  | 2.293 to 29.831                                                                 | 2.143 to 25.000                                                                                                | 2.147 to 33.221                                                                                                |
| Data/restr/params.                                   | 5486 / 0 / 223                                                                   | 5227 / 0 / 222                                                                  | 14738 / 972 / 1129                                                                                             | 5431 / 0 / 161                                                                                                 |
| GOF ( <i>F</i> <sup>2</sup> )                        | 1.077                                                                            | 1.001                                                                           | 1.034                                                                                                          | 1.037                                                                                                          |
| Limiting Indices                                     | -18<= <i>h</i> <=18<br>-16<= <i>k</i> <=17<br>-32<= <i>l</i> <=32                | -17<= <i>h</i> <=18<br>-16<= <i>k</i> <=16<br>-32<= <i>l</i> <=32               | -15<= <i>h</i> <=14<br>-21<= <i>k</i> <=21,<br>-24<= <i>l</i> <=24                                             | -14<= <i>h</i> <=14<br>-27<= <i>k</i> <=27<br>-13<= <i>l</i> <=12                                              |
| <i>RI</i> , <i>wR2</i>                               | 0.0498, 0.1365                                                                   | 0.0429, 0.0954                                                                  | 0.0595, 0.1307                                                                                                 | 0.0344, 0.0796                                                                                                 |
| R indices (all data) <i>RI</i> , <i>wR2</i>          | 0.0677, 0.1469                                                                   | 0.1136, 0.1264                                                                  | 0.1010, 0.1492                                                                                                 | 0.0495, 0.0877                                                                                                 |
| Largest different peak and hole (e Å <sup>-3</sup> ) | 0.806, -0.694                                                                    | 0.817, -0.624                                                                   | 0.530, -0.713                                                                                                  | 0.501, -0.644                                                                                                  |

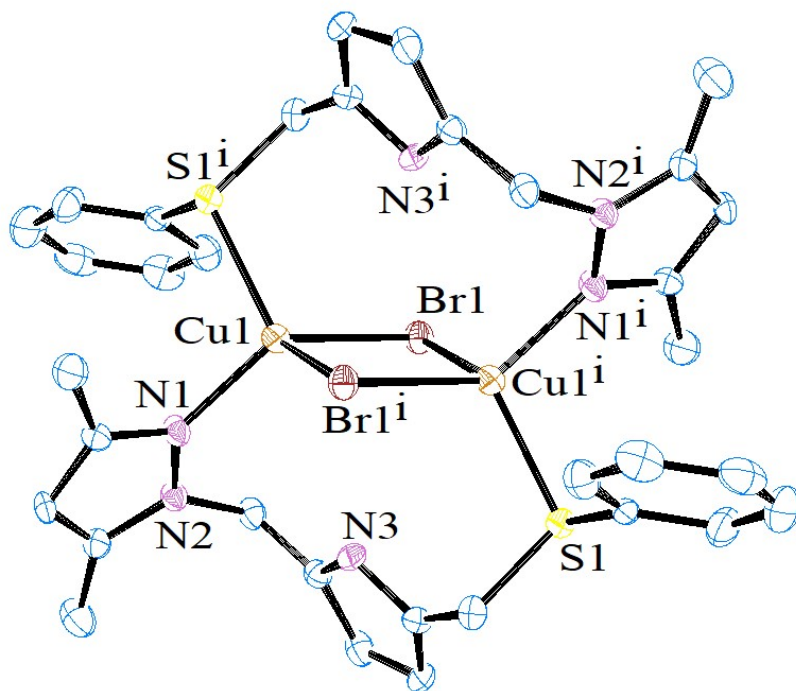

**Figure S1.** ORTEP diagram of Complex **6** with 50% probability ellipsoids. All hydrogen atoms are omitted for clarity. Selected bond lengths (Å) and angles (°): Cu1<sup>i</sup>-S1 2.3021(14), Cu1-N1 2.028(4), Cu1-Br1<sup>i</sup> 2.5389(9), Cu1-Br1 2.4973(8), N1-Cu1-S1<sup>i</sup> 105.78(12), N1-Cu1-Br1 124.04(11), S1<sup>i</sup>-Cu1-Br1 108.42(4), N1-Cu1-Br1<sup>i</sup> 103.24(12), S1<sup>i</sup>-Cu1-Br1<sup>i</sup> 118.38(4), Br1-Cu1-Br1<sup>i</sup> 97.74(3), Cu1-Br1-Cu1<sup>i</sup> 82.26(3). Hydrogen bonding: N3<sup>···</sup>Br1<sup>i</sup> 3.517(4), H<sup>···</sup> Br1<sup>i</sup> 2.82(4), N3-H<sup>···</sup>Br1<sup>i</sup> 155(4). Symmetry transformations used to generate equivalent atoms: (i)  $-x+1, -y+1, -z$ .

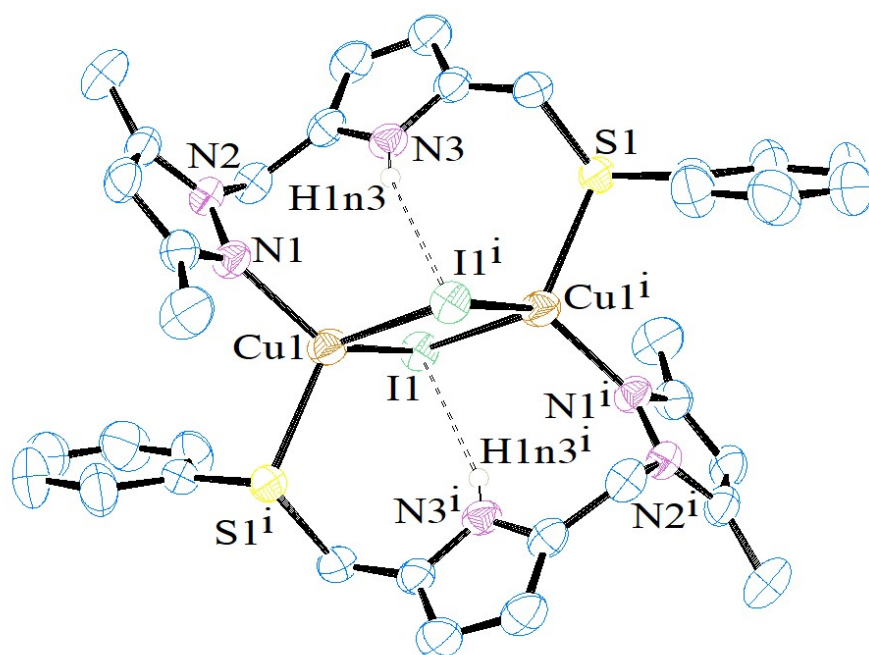

**Figure S2.** ORTEP diagram of **7** with 50% probability ellipsoids. Most hydrogen atoms are omitted for clarity. Selected bond lengths (Å) and angles (°): Cu1<sup>i</sup>- S1 2.3350(7), Cu1-N1 2.0415(19), Cu1-I1<sup>i</sup> 2.7128(4), Cu1-I1 2.6606(4), N1-Cu1-S1<sup>i</sup> 107.04(6), N1-Cu1-I1 124.05(6), S1<sup>i</sup>-Cu1-I1 108.039(19), N1-Cu1-I1<sup>i</sup> 102.92(6), S1<sup>i</sup>-Cu1-I1<sup>i</sup> 113.71(2), I1-Cu1-I1<sup>i</sup> 101.084(11), Cu1-I1-Cu1<sup>i</sup> 78.916(12). Hydrogen bonding: N3···I1<sup>i</sup> 3.715(2), H··· I1<sup>i</sup> 2.99(3), N3-H···I1<sup>i</sup> 163(3). Symmetry transformations used to generate equivalent atoms: (i)  $-x, -y, -z+2$ .

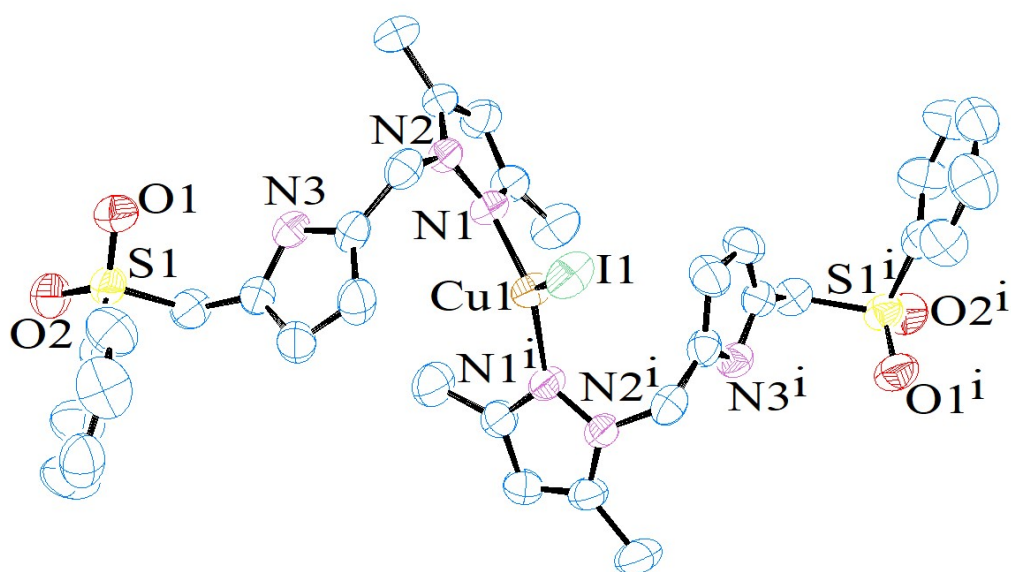

**Figure S3.** ORTEP diagram of **10** with 50% probability ellipsoids. All hydrogen atoms are omitted for clarity. Selected bond lengths (Å) and angles (°): Cu1-N1 1.983(3), Cu1-I1 2.5610(8), O2-S1 1.443(3), O1-S1 1.437(3), N1-Cu1-N1<sup>i</sup> 121.59(18), N1-Cu1-I1 119.21(9). Hydrogen bonding: N3...O2<sup>ii</sup> 3.103(5), H...O2<sup>ii</sup> 2.31(4), N3-H...O2<sup>ii</sup> 174(4). Symmetry transformations used to generate equivalent atoms: (i)  $-x+1, y, -z+1/2$ , (ii)  $-x+3/2, -y+1/2, -z$ .

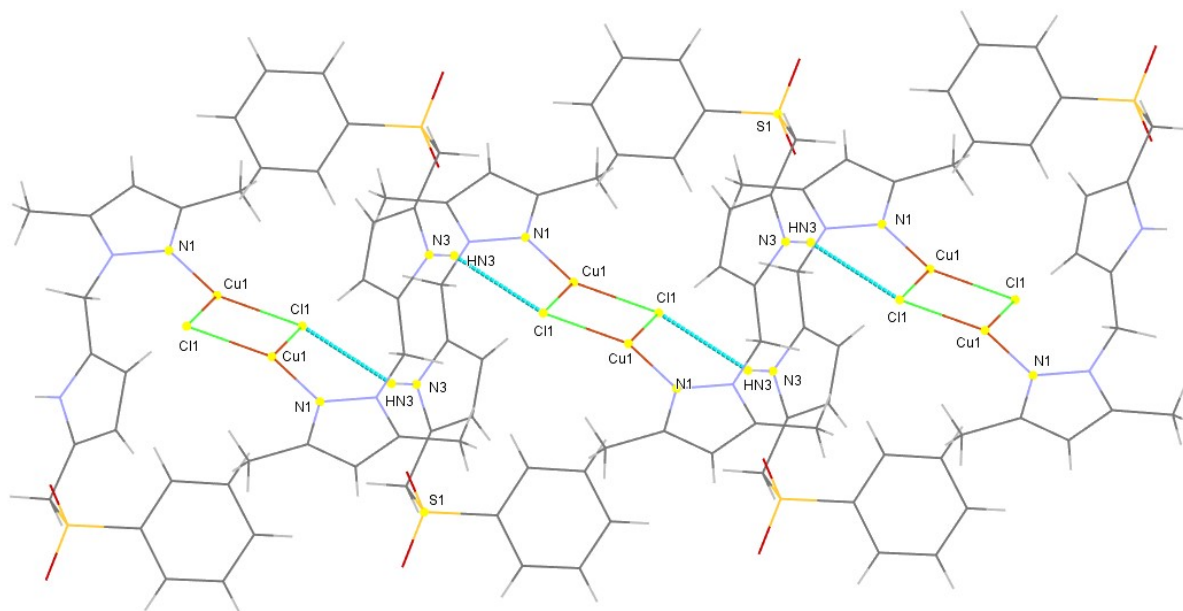

**Figure S4.** The intermolecular pyrrole NH...Cl hydrogen bonds in the crystal lattice of structure **8**.

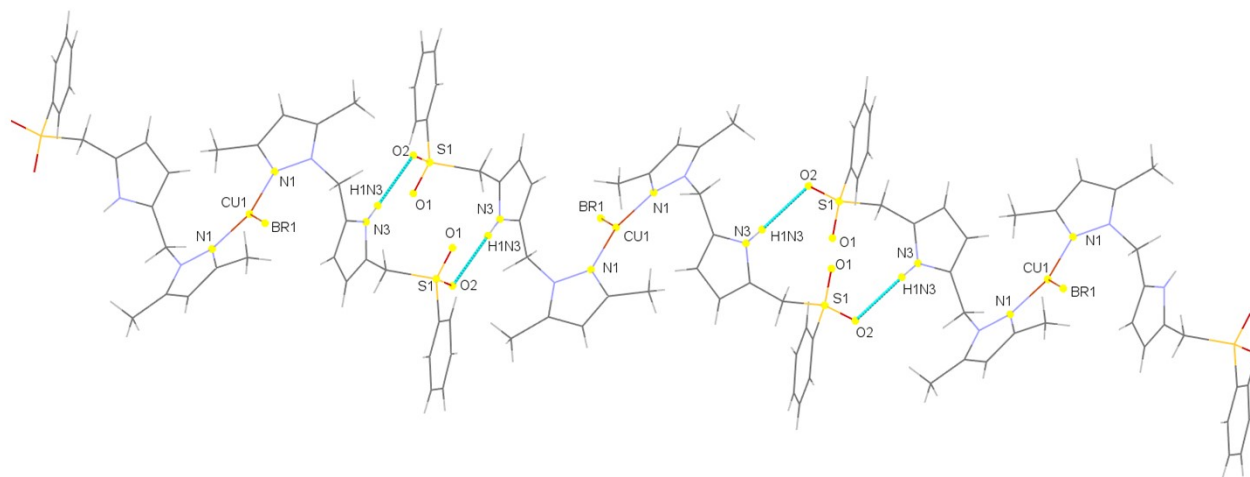

**Figure S5.** The intermolecular pyrrole NH...O(SO<sub>2</sub>) hydrogen bonds in the crystal lattice of structure **9**.

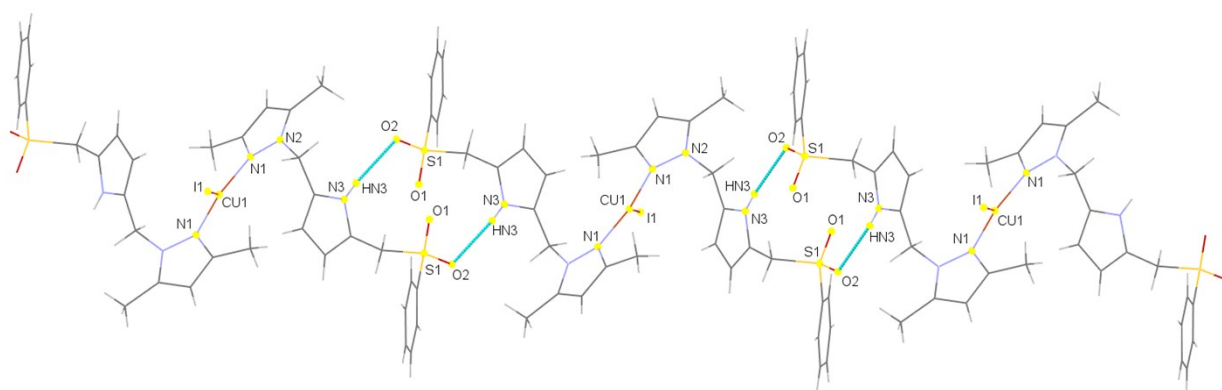

**Figure S6.** The intermolecular pyrrole NH...O(SO<sub>2</sub>) hydrogen bonds in the crystal lattice of structure **10**.



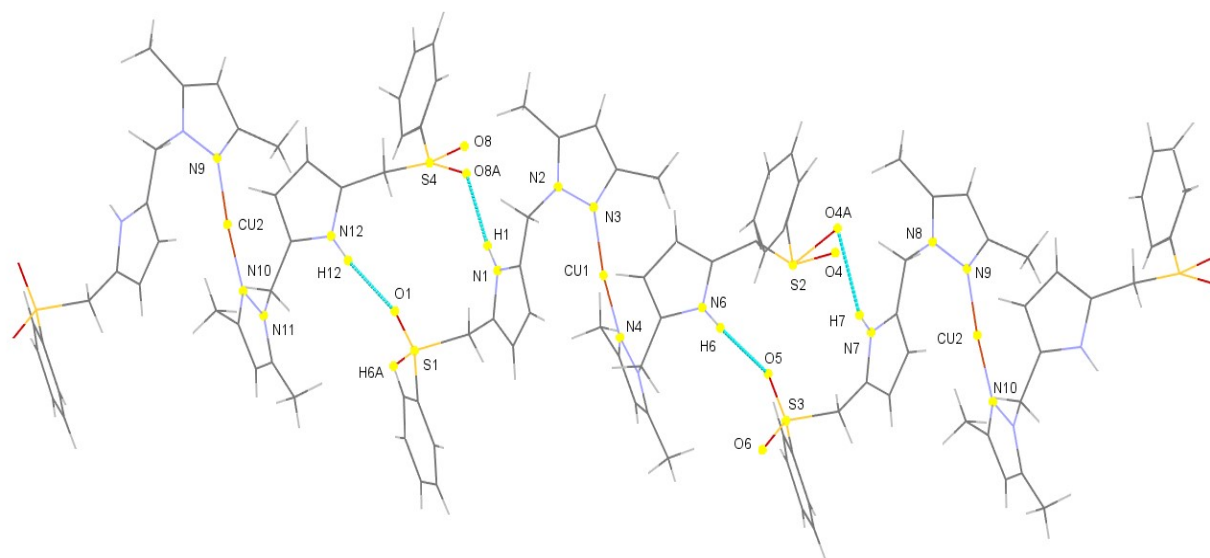

**Figure S7.** The intermolecular pyrrole NH...O(SO<sub>2</sub>) hydrogen bonds in the crystal lattice of structure **11a**.

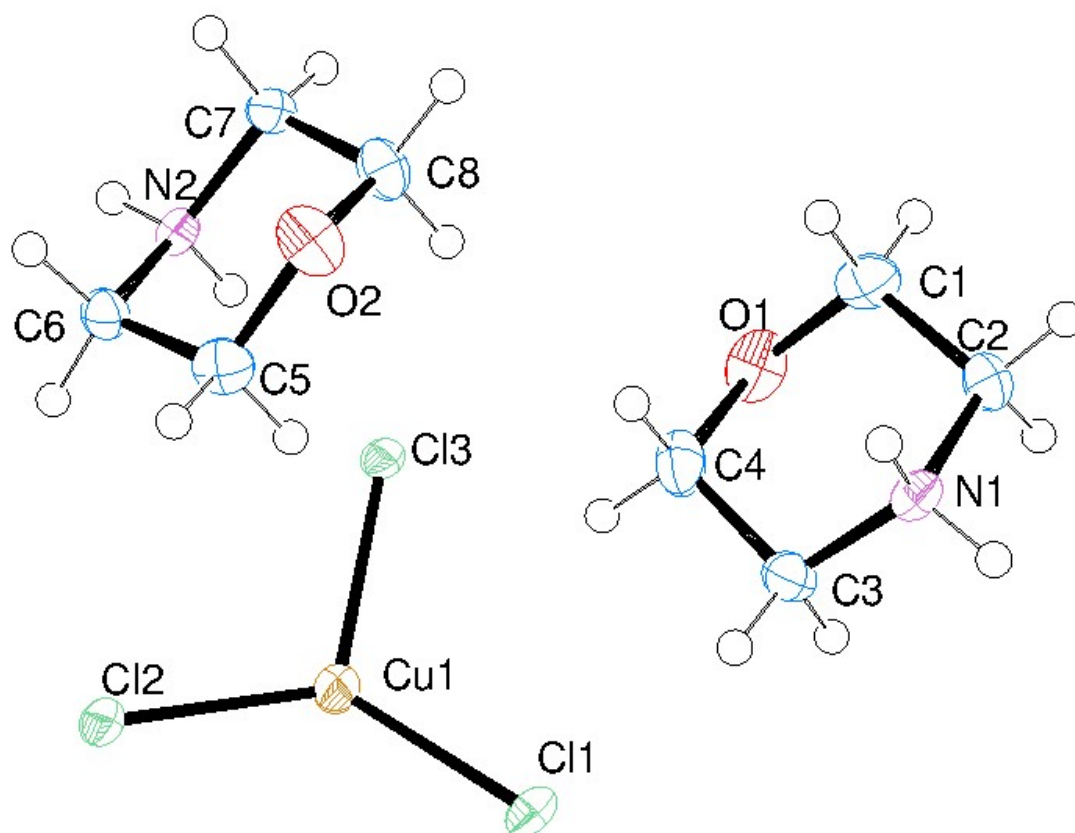

**Figure S8.** ORTEP diagram of asymmetric unit of the structure of morpholinium copper(I) salt with 50% probability ellipsoids. Selected bond lengths (Å) and angles (°): Cu1-Cl2 2.2660(4), Cu1-Cl1 2.2670(4), Cu1-Cl3 2.3300(4), Cu1-Cl1<sup>i</sup> 2.7605(4), N2-C7 1.491(2), N2-C6 1.4940(19), C6-C5 1.516(2), O2-C5 1.426(2), O2-C8 1.4320(19), C7-C8 1.507(2); Cl2-Cu1-Cl1 128.117(16), Cl2-Cu1-Cl3 111.753(15), Cl1-Cu1-Cl3 114.503(15), Cl2-Cu1-Cl1<sup>i</sup> 101.393(15), Cl1-Cu1-Cl1<sup>i</sup> 95.042(13), Cl3-Cu1-Cl1<sup>i</sup> 97.109(14), Cu1-Cl1-Cu1<sup>i</sup> 84.957(13). Symmetry transformations used to generate equivalent atoms: (i) -x+1, -y+1, -z+1.

**Table S3. Hydrogen bonds**

| D-H...A                       | d(D-H), Å | d(H...A), Å | d(D...A), Å | <(DHA), ° |
|-------------------------------|-----------|-------------|-------------|-----------|
| N2-H3...Cl3                   | 0.87(2)   | 2.31(2)     | 3.1591(13)  | 166.5(18) |
| N(1)-H(2)...Cl3 <sup>ii</sup> | 0.88(2)   | 2.34(2)     | 3.1798(13)  | 160.1(18) |

|                            |         |         |            |           |
|----------------------------|---------|---------|------------|-----------|
| N2-H4...Cl1 <sup>iii</sup> | 0.87(2) | 2.65(2) | 3.2937(13) | 131.6(17) |
| N1-H1...Cl2 <sup>iv</sup>  | 0.90(2) | 2.27(2) | 3.1345(13) | 162.4(17) |
| N2-H4...Cl3 <sup>v</sup>   | 0.87(2) | 2.67(2) | 3.2853(13) | 129.4(17) |

Symmetry transformations used to generate equivalent atoms: (i)  $-x+1, -y+1, -z+1$  (ii)  $x, -y+1/2, z-1/2$  (iii)  $x-1, y, z$  (iv)  $-x+1, y-1/2, -z+1/2$  (v)  $-x, -y+1, -z+1$

## 2. Catalysis studies

**Table S4.** Optimization of the catalytic hydroamination-alkynylation reaction between phenylacetylene and morpholine using the copper(I) chloride complex **8** containing the sulfone ligand **4**.

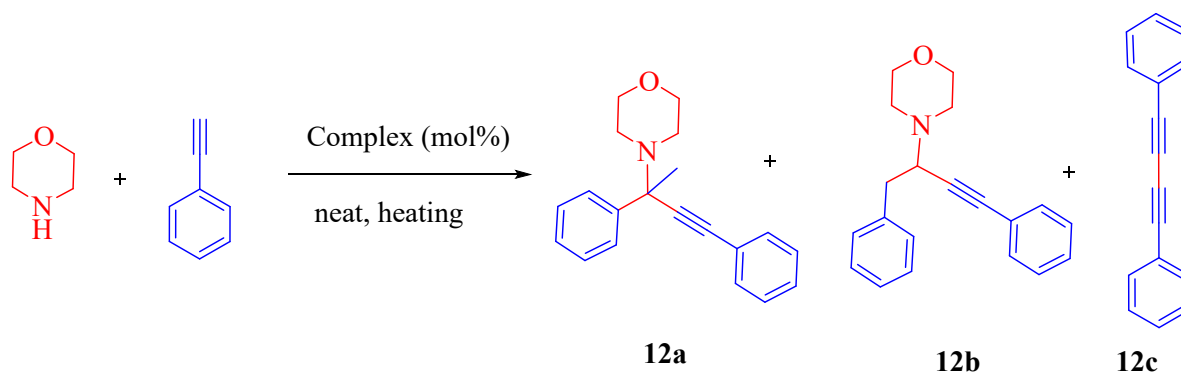

| Entry | Amine (equiv) | Alkyne (equiv) | Complex (mol%) | Temp. (°C) | Time (h) | Yield (%) <sup>a</sup> |     |       |
|-------|---------------|----------------|----------------|------------|----------|------------------------|-----|-------|
|       |               |                |                |            |          | 12a                    | 12b | Diyne |
| 1     | 1             | 2              | <b>8</b> (5)   | 80         | 14       | 8                      | 30  | -     |
| 2     | 1             | 2              | <b>8</b> (2)   | 80         | 14       | 9                      | 33  | -     |
| 3     | 1             | 2              | <b>8</b> (1.5) | 80         | 14       | 4                      | 45  | -     |
| 4     | 1             | 2              | <b>8</b> (1)   | 80         | 14       | 2                      | 45  | -     |
| 5     | 1             | 2              | <b>8</b> (0.5) | 80         | 14       | 8                      | 27  | -     |
| 6     | 1.5           | 4              | <b>8</b> (1)   | 80         | 36       | 2                      | 63  | -     |
| 7     | 3             | 1              | <b>8</b> (1)   | 80         | 14       | 2                      | 14  | -     |
| 8     | 1             | 6              | <b>8</b> (5)   | 80         | 14       | 19                     | 63  | -     |
| 9     | 1             | 4              | <b>8</b> (5)   | 80         | 14       | 16                     | 62  | -     |
| 10    | 1             | 4              | <b>8</b> (1)   | 110        | 2        | 21                     | 74  | -     |
| 11    | 1             | 4              | <b>8</b> (0.5) | 110        | 12       | 3                      | 50  | -     |
| 12    | 1             | 4              | <b>5</b> (1)   | 110        | 1.5      | 27                     | 71  | -     |

<sup>a</sup>Isolated yields based on morpholine.

The catalytic hydroamination-alkynylation reaction between morpholine and phenylacetylene in the presence of complex **8** under different conditions was optimized and summarized in Table S4. The reaction between morpholine and phenylacetylene in the 1:2 molar ratio in the presence of 5 mol% of complex **8** in a pressure tube at 80 °C for 14 h without exogenous solvent under nitrogen atmosphere yielded a mixture of products from which compound **12a** (8%) and **12b** (30%) were isolated in a pure form by basic alumina column chromatography separation (entry 1). When the loading of complex **8** was gradually decreased to 2, 1.5 and then to 1 mol% with other conditions remaining the same, the yield of the trisubstituted propargylamine (**12b**) increased to 45%, whereas the tetrasubstituted propargylamine (**12a**)

decreased to 2% yield (entry 2-4). The further decrease in the catalyst loading (0.5 mol%) resulted in the decreased isolated yield of 27% for **12b** (entry 5). When the alkyne/amine mole ratio is high (4:1.5) with 1 mol% of complex, the yield of **12b** is increased to 63% yield and that of **12a** remained almost the same (2%) (entry 6). Conversely, when the alkyne/amine ratio is low (1:3), the yield of **12b** also decreased (14%) with 2% yield of **12a** (entry 7). This is consistent with the structure of the product containing two phenylacetylene moieties. Subsequently, to improve the yield of product, the catalyst loading was increased to 5 mol% with alkyne/amine mole ratio of 6:1 or 4:1 at 80 °C (entry 8 and 9). Yet, the yield of the trisubstituted product did not improve beyond 63%. Remarkably, the yields of both products increased to 74% and 21% when the temperature of the reaction is increased to 110 °C with 1 mol% of catalyst (entry 10). Further, under the same conditions, when the catalyst loading is 0.5 mol%, the yield of the trisubstituted product is decreased to 50% (entry 11). Similar result was obtained with complex **5** (entry 12).

#### **Catalytic hydroamination-alkynylation using [Cu(CH<sub>3</sub>CN)<sub>4</sub>]BF<sub>4</sub>**

Under dinitrogen atmosphere, an oven dried teflon-capped pressure tube equipped with a stirring bar was charged with *N*-phenylpiperazine (0.20 mL, 1.26 mmol), phenylacetylene (0.56 mL, 5.09 mmol), and [Cu(CH<sub>3</sub>CN)<sub>4</sub>]BF<sub>4</sub> (0.0396 g, 0.1258 mmol). After closing the tube with Teflon cap tightly, the bottom of the tube containing the reaction mixture was placed in a preheated oil bath at 110 °C and stirred for 24 h. Under dinitrogen atmosphere, the reaction was monitored by TLC to check if *N*-phenylpiperazine is completely consumed. After cooling down to room temperature, the reaction mixture was loaded onto a basic alumina column and eluted with ethyl acetate/hexane (*v/v* = 1/99) mixture. The solvent was evaporated from the first fraction using rotary evaporator and then dried under vacuum to obtain the tetrasubstituted propargylamine **17a**, and the second fraction of solvent gave the trisubstituted product **17b**. <sup>1</sup>H and <sup>13</sup>C NMR spectra were recorded to confirm their purity and structure. For **17a**: 0.402 g, 1.096 mmol, yield = 87%. For **17b**: 0.021 g, 0.057 mmol, yield = 5%.

#### **Catalytic hydroamination-alkynylation using complex **11b****

Under dinitrogen atmosphere, an oven dried teflon-capped pressure tube equipped with a stirring bar was charged with *N*-phenylpiperazine (0.20 mL, 1.26 mmol), phenylacetylene (0.56 mL, 5.09 mmol), and copper complex **11b** (0.0102 g, 0.0126 mmol). After closing the tube with Teflon cap tightly, the bottom of the tube containing the reaction mixture was placed in a

preheated oil bath at 110 °C and stirred for 12 h. Under dinitrogen atmosphere, the reaction was monitored by TLC to check if n-phenyl piperazine is completely consumed. After cooling down to room temperature, the reaction mixture was loaded onto a basic alumina column and eluted with ethyl acetate/hexane ( $v/v = 1/99$ ) mixture. The solvent was evaporated from the first fraction using rotary evaporator and then dried under vacuum to obtain the tetrasubstituted propargylamine **17a**, and the second fraction of solvent gave the trisubstituted product **17b**.  $^1\text{H}$  and  $^{13}\text{C}$  NMR spectra were recorded to confirm their purity and structure. For **17a**: 0.321 g, 0.875 mmol, yield = 70%. For **17b**: 0.082g, 0.223 mmol., yield = 18%.

### 3. Substrate scope data

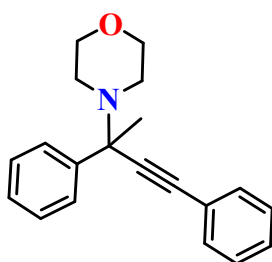

**4-(2,4-diphenylbut-3-yn-2-yl)morpholine<sup>4</sup> 12a**: 0.090 g, 0.309 mmol, yield = 27%.  $^1\text{H}$  NMR ( $\text{CDCl}_3$ , 500 MHz):  $\delta = 7.75$  (d,  $J(\text{HH}) = 10.0$ , 2H,  $\text{C}_6\text{H}_5$ ), 7.53 (t,  $J(\text{HH}) = 5.0$ , 2H,  $\text{C}_6\text{H}_5$ ), 7.34-7.31 (m, 5H,  $\text{C}_6\text{H}_5$ ), 7.25 (t,  $J(\text{HH}) = 5.0$ , 1H,  $\text{C}_6\text{H}_5$ ), 3.71 (t,  $J(\text{HH}) = 5.0$ , 4H, morpholine  $\text{CH}_2$ ), 2.71 (br s, 2H, morpholine  $\text{CH}_2$ ), 2.48 (br s, 2H, morpholine  $\text{CH}_2$ ), 1.66 (s, 3H,  $\text{CH}_3$ ).  $^{13}\text{C}\{^1\text{H}\}$  NMR ( $\text{CDCl}_3$ , 125.7 MHz):  $\delta = 145.0$ , 132.0, 128.4, 128.4, 128.3, 127.4, 126.8, 123.3, 88.4, 88.3, 67.6, 63.5, 48.2, 30.6. HRMS (+ ESI): calcd  $m/z$  for  $[\text{M}+\text{H}]^+$   $\text{C}_{20}\text{H}_{22}\text{NO}^+$ : 292.1696, found: 292.1709.

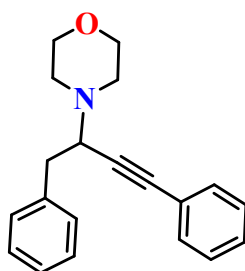

**4-(1,4-diphenylbut-3-yn-1-yl)morpholine<sup>5</sup> 12b**: 0.240 g, 0.823 mmol, yield = 71%.  $^1\text{H}$  NMR ( $\text{CDCl}_3$ , 500 MHz):  $\delta = 7.43$ -7.26 (m, 10H,  $\text{C}_6\text{H}_5$ ), 3.85-3.75 (m, 5H, morpholine  $\text{CH}_2$ ,  $\text{CH}$ ),

3.13 (dd,  $J(\text{HH}) = 10.0, 5.0$ , 1H,  $\text{CH}_2$ ), 3.04 (dd,  $J(\text{HH}) = 10.0, 5.0$ , 1H,  $\text{CH}_2$ ), 2.87-2.83 (m, 2H, morpholine  $\text{CH}_2$ ), 2.70-2.66 (m, 2H, morpholine  $\text{CH}_2$ ).  $^{13}\text{C}$  NMR ( $\text{CDCl}_3$ , 125.7 MHz, ppm)  $\delta = 138.5, 131.7, 129.5, 128.3, 128.2, 128.1, 126.5, 123.1, 87.4, 86.4, 67.1, 60.2, 49.9, 39.6$ . HRMS (+ ESI): calcd  $m/z$  for  $[\text{M}+\text{H}]^+$   $\text{C}_{20}\text{H}_{22}\text{NO}^+$ : 292.1696, found: 292.1697.

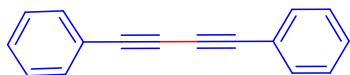

**1,4-diphenylbuta-1,3-diyne<sup>6</sup> 12c**: 0.170 g, 0.840 mmol, yield = 36%.  $^1\text{H}$  NMR ( $\text{CDCl}_3$ , 500 MHz):  $\delta = 7.54$  (d,  $J(\text{HH}) = 5.0$ , 4H,  $\text{C}_6\text{H}_5$ ), 7.38-7.33 (m, 6H,  $\text{C}_6\text{H}_5$ ).  $^{13}\text{C}\{^1\text{H}\}$  NMR ( $\text{CDCl}_3$ , 125.7 MHz):  $\delta = 132.7, 129.3, 128.6, 122.0, 81.7, 74.1$ .

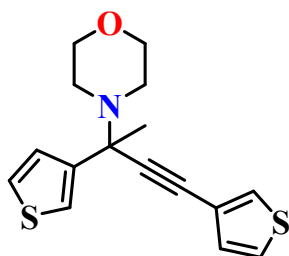

**4-(2,4-di(thiophen-3-yl)but-3-yn-2-yl)morpholine 13a**: 0.100 g, 0.330 mmol, yield = 28%.  $^1\text{H}$  NMR ( $\text{CDCl}_3$ , 500 MHz):  $\delta = 7.46$  (d,  $J(\text{HH}) = 5.0$ , 1H, thiophene  $\text{CH}$ ), 7.41 (d,  $J(\text{HH}) = 5.0$ , 1H, thiophene  $\text{CH}$ ), 7.27-7.14 (m, 4H, thiophene  $\text{CH}$ ), 3.69 (t,  $J(\text{HH}) = 5.0$ , 4H, morpholine  $\text{CH}_2$ ), 2.68 (t,  $J(\text{HH}) = 5.0$ , 2H, morpholine  $\text{CH}_2$ ), 2.45 (t,  $J(\text{HH}) = 5.0$ , 2H, morpholine  $\text{CH}_2$ ), 1.67 (s, 3H,  $\text{CH}_3$ ). HRMS (+ ESI): calcd  $m/z$  for  $[\text{M}+\text{H}]^+$   $\text{C}_{16}\text{H}_{18}\text{NOS}_2^+$ : 304.0825, found: 304.0819.

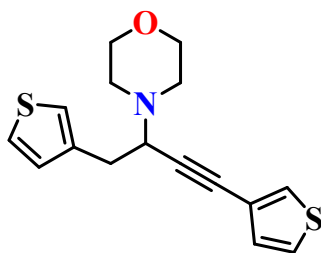

**4-(1,4-di(thiophen-3-yl)but-3-yn-2-yl)morpholine 13b**: 0.200 g, 0.660 mmol, yield = 57%.  $^1\text{H}$  NMR ( $\text{CDCl}_3$ , 500 MHz):  $\delta = 7.40$  (d,  $J(\text{HH}) = 5.0$ , 1H, thiophene  $\text{CH}$ ), 7.27-7.24 (m, 2H, thiophene  $\text{CH}$ ), 7.17 (d,  $J(\text{HH}) = 5.0$ , 1H, thiophene  $\text{CH}$ ), 7.10-7.08 (m, 2H, thiophene  $\text{CH}$ ), 3.82-3.71 (m, 5H, morpholine  $\text{CH}_2$  and  $\text{CH}$ ), 3.07 (m, 2H,  $\text{CH}_2$ ), 2.82-2.78 (m, 2H, morpholine

$CH_2$ ), 2.65-2.62 (m, 2H, morpholine  $CH_2$ ).  $^{13}C\{^1H\}$  NMR ( $CDCl_3$ , 125.7 MHz):  $\delta$  = 138.7, 130.0, 128.9, 128.5, 125.3, 125.1, 122.1, 122.1, 86.1, 82.1, 67.1, 59.4, 49.8, 34.0.

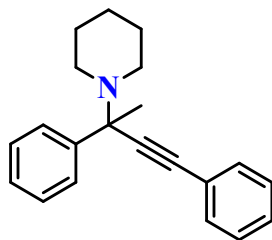

**1-(2,4-diphenylbut-3-yn-2-yl)piperidine<sup>7</sup> 14a:** 0.050 g, 0.173 mmol, yield = 18%.  $^1H$  NMR ( $CDCl_3$ , 400 MHz):  $\delta$  = 7.76 (d,  $J(HH)$  = 8.0, 2H,  $C_6H_5$ ), 7.53 (d,  $J(HH)$  = 8.0, 2H,  $C_6H_5$ ), 7.35-7.22 (m, 6H,  $C_6H_5$ ), 2.67 (br s, 2H, piperidine  $CH_2$ ), 2.42 (d,  $J(HH)$  = 8.0, 2H, piperidine  $CH_2$ ), 1.65 (s, 3H,  $CH_3$ ), 1.61 (br s, 2H, piperidine  $CH_2$ ), 1.56 (br s, 2H, piperidine  $CH_2$ ), 1.45 (d,  $J(HH)$  = 8.0, 2H, piperidine  $CH_2$ ).  $^{13}C\{^1H\}$  NMR ( $CDCl_3$ , 125.7 MHz):  $\delta$  = 146.4, 132.0, 128.4, 128.2, 128.0, 127.0, 126.6, 123.8, 89.6, 87.6, 63.8, 48.9, 31.3, 26.7, 24.9.

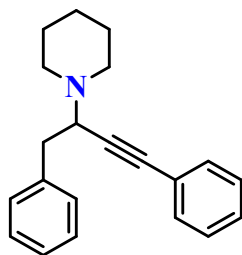

**1-(1,4-diphenylbut-3-yn-2-yl)piperidine<sup>5</sup> 14b:** 0.200 g, 0.691 mmol, yield = 71%.  $^1H$  NMR ( $CDCl_3$ , 500 MHz):  $\delta$  = 7.34-7.15 (m, 10H,  $C_6H_5$ ), 3.67 (q,  $J(HH)$  = 5.0, 1H,  $CH$ ), 3.01-2.94 (m, 2H,  $CH_2$ ), 2.72 (br s, 2H, piperidine  $CH_2$ ), 2.53 (br s, 2H, piperidine  $CH_2$ ), 1.64-1.57 (m, 4H, piperidine  $CH_2$ ), 1.44-1.42 (m, 2H, piperidine  $CH_2$ ).  $^{13}C\{^1H\}$  NMR ( $CDCl_3$ , 125.7 MHz):  $\delta$  = 139.0, 131.6, 129.6, 128.2, 128.1, 127.8, 126.3, 123.5, 87.3, 86.8, 60.8, 50.8, 40.1, 26.2, 24.6.

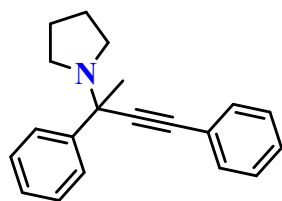

**1-(2,4-diphenylbut-3-yn-2-yl)pyrrolidine<sup>8</sup> 15a:** 0.100 g, 0.363 mmol, yield = 30%.  $^1H$  NMR ( $CDCl_3$ , 500 MHz):  $\delta$  = 7.78 (d,  $J(HH)$  = 10.0, 2H,  $C_6H_5$ ), 7.52 (t,  $J(HH)$  = 5.0, 2H,  $C_6H_5$ ), 7.35-7.30 (m, 5H,  $C_6H_5$ ), 7.25 (t,  $J(HH)$  = 7.5, 1H,  $C_6H_5$ ), 2.77 (d,  $J(HH)$  = 5.0, 2H, pyrrolidine



$CH_2$ ), 2.62 (q,  $J(HH) = 5.0$ , 2H, pyrrolidine  $CH_2$ ), 1.78 (t,  $J(HH) = 7.5$ , 4H, pyrrolidine  $CH_2$ ), 1.73 (s, 3H,  $CH_3$ ).  $^{13}C\{^1H\}$  NMR ( $CDCl_3$ , 125.7 MHz):  $\delta = 145.7, 132.0, 128.4, 128.2, 128.1, 127.2, 126.6, 123.6, 89.5, 87.5, 62.9, 48.6, 32.4, 24.0$ .

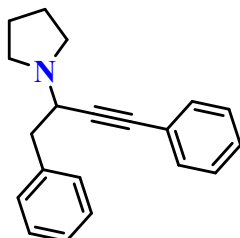

**1-(1,4-diphenylbut-3-yn-2-yl)pyrrolidine<sup>5</sup> 15b:** 0.200 g, 0.726 mmol, yield = 61%.  $^1H$  NMR ( $CDCl_3$ , 500 MHz):  $\delta = 7.33-7.17$  (m, 10H,  $C_6H_5$ ), 3.90 (q,  $J(HH) = 5.0$ , 1H,  $CH$ ), 3.08 (m, 1H,  $CH_2$ ), 2.93 (t,  $J(HH) = 10.0$ , 1H,  $CH_2$ ), 2.80 (d,  $J(HH) = 5.0$ , 2H, pyrrolidine  $CH_2$ ), 2.74 (d,  $J(HH) = 10.0$ , 2H, pyrrolidine  $CH_2$ ), 1.79 (t,  $J(HH) = 7.5$ , 4H, pyrrolidine  $CH_2$ ).  $^{13}C\{^1H\}$  NMR ( $CDCl_3$ , 125.7 MHz):  $\delta = 138.8, 131.7, 129.5, 128.2, 128.2, 127.9, 126.4, 123.4, 87.5, 86.5, 57.1, 49.8, 41.8, 23.6$ .

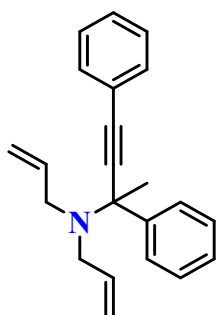

**N,N-diallyl-2,4-diphenylbut-3-yn-2-amine 16a:** 0.040 g, 0.132 mmol, yield = 16%.  $^1H$  NMR ( $CDCl_3$ , 500 MHz):  $\delta = 7.83$  (d,  $J(HH) = 10.0$ , 2H,  $C_6H_5$ ), 7.55 (d,  $J(HH) = 5.0$ , 2H,  $C_6H_5$ ), 7.36 (t,  $J(HH) = 7.5$ , 5H,  $C_6H_5$ ), 7.27 (t,  $J(HH) = 5.0$ , 1H,  $C_6H_5$ ), 6.00-5.96 (m, 2H,  $CH$ ), 5.18 (d,  $J(HH) = 15.0$ , 2H,  $CH_2$ ), 5.06 (d,  $J(HH) = 10.0$ , 2H,  $CH_2$ ), 3.35 (dd,  $J(HH) = 10.0, 15.0$ , 2H,  $CH_2$ ), 3.26 (d,  $J(HH) = 15.0$ , 2H,  $CH_2$ ), 1.70 (s, 3H,  $CH_3$ ).  $^{13}C\{^1H\}$  NMR ( $CDCl_3$ , 125.7 MHz):  $\delta = 146.7, 138.0, 131.8, 130.2, 128.5, 128.3, 128.1, 127.2, 126.6, 115.6, 91.1, 86.9, 64.1, 53.5, 32.5$ .

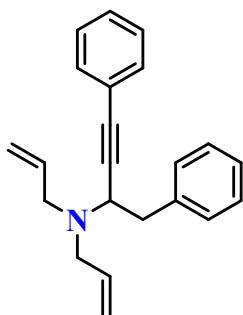

**N,N-diallyl-1,4-diphenylbut-3-yn-2-amine<sup>5</sup> 16b:** 0.200 g, 0.663 mmol, yield = 82%. <sup>1</sup>H NMR (CDCl<sub>3</sub>, 500 MHz): δ = 7.36 (d, *J*(HH) = 5.0, 2H, C<sub>6</sub>H<sub>5</sub>), 7.26 (t, *J*(HH) = 5.0, 7H, C<sub>6</sub>H<sub>5</sub>), 7.19 (q, *J*(HH) = 5.0, 1H, C<sub>6</sub>H<sub>5</sub>), 5.79 (q, *J*(HH) = 5.0, 10.0, 2H, CH), 5.18 (d, *J*(HH) = 15.0, 2H, CH<sub>2</sub>), 5.09 (d, *J*(HH) = 10.0, 2H, CH<sub>2</sub>), 3.95 (t, *J*(HH) = 7.5, 1H, CH), 3.38 (q, *J*(HH) = 5.0, 2H, CH<sub>2</sub>), 3.05 (dd, *J*(HH) = 5.0, 15.0, 2H, CH<sub>2</sub>), 3.01-2.94 (m, 2H, CH<sub>2</sub>). <sup>13</sup>C{<sup>1</sup>H} NMR (CDCl<sub>3</sub>, 125.7 MHz): δ = 138.9, 136.5, 131.8, 129.7, 128.3, 128.2, 128.0, 126.4, 123.6, 117.3, 87.7, 86.2, 55.4, 54.2, 40.6.

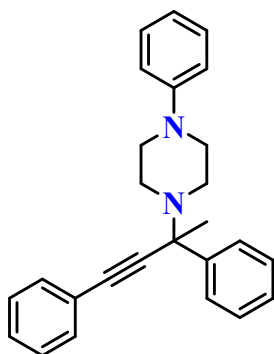

**1-(2,4-diphenylbut-3-yn-2-yl)-4-phenylpiperazine 17a:** 0.321 g, 0.875 mmol, yield = 70% (using complex **11b**) and 0.402 g, 1.096 mmol, yield 87% (using [Cu(CH<sub>3</sub>CN)<sub>4</sub>][BF<sub>4</sub>]) <sup>1</sup>H NMR (CDCl<sub>3</sub>, 500 MHz): δ = 7.79 (d, *J*(HH) = 5.5, 2H, C<sub>6</sub>H<sub>5</sub>), 7.52 (t, *J*(HH) = 5.0, 2H, C<sub>6</sub>H<sub>5</sub>), 7.34 (t, *J*(HH) = 7.5, 2H, C<sub>6</sub>H<sub>5</sub>), 7.30-7.21 (m, 6H, C<sub>6</sub>H<sub>5</sub>), 6.91 (d, *J*(HH) = 10.0, 2H, C<sub>6</sub>H<sub>5</sub>), 6.82 (t, *J*(HH) = 7.5, 1H, C<sub>6</sub>H<sub>5</sub>), 3.22-3.15 (m, 4H, piperazine CH<sub>2</sub>), 2.90 (br d, *J*(HH) = 5.0, 2H, piperazine CH<sub>2</sub>), 2.66 (t, *J*(HH) = 5.0, 2H, piperazine CH<sub>2</sub>), 1.72 (s, 3H, CH<sub>3</sub>). <sup>13</sup>C{<sup>1</sup>H} NMR (CDCl<sub>3</sub>, 125.7 MHz): δ = 151.5, 145.3, 132.0, 129.2, 128.4, 128.4, 128.2, 127.3, 126.6, 123.3, 119.6, 115.9, 88.5, 88.3, 63.3, 49.6, 47.7, 31.1.

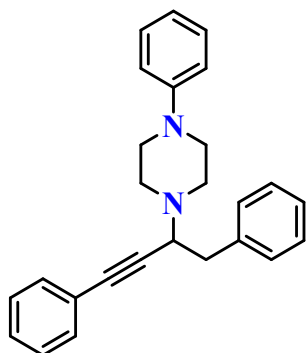

**1-(1,4-diphenylbut-3-yn-2-yl)-4-phenylpiperazine 17b:** 0.400 g, 1.091 mmol, yield = 87%.  $^1\text{H}$  NMR ( $\text{CDCl}_3$ , 400 MHz):  $\delta$  = 7.37-7.21 (m, 12H,  $\text{C}_6\text{H}_5$ ), 6.95 (d,  $J(\text{HH})$  = 5.0, 2H,  $\text{C}_6\text{H}_5$ ), 6.85 (t,  $J(\text{HH})$  = 7.5, 1H,  $\text{C}_6\text{H}_5$ ), 3.80 (q,  $J(\text{HH})$  = 5.0, 1H, CH), 3.28-3.23 (m, 4H, piperazine  $\text{CH}_2$ ), 3.12-3.08 (m, 1H,  $\text{CH}_2$ ), 3.03 (s, 1H,  $\text{CH}_2$ ), 3.01-2.96 (m, 2H, piperazine  $\text{CH}_2$ ), 2.81-2.77 (m, 2H, piperazine  $\text{CH}_2$ ).  $^{13}\text{C}\{^1\text{H}\}$  NMR ( $\text{CDCl}_3$ , 125.7 MHz):  $\delta$  = 151.6, 138.8, 131.8, 129.7, 129.3, 128.4, 128.2, 126.7, 123.3, 119.9, 116.3, 87.5, 86.6, 60.1, 49.7, 49.5, 40.1.

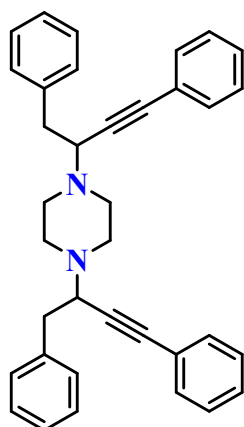

**1,4-bis(1,4-diphenylbut-3-yn-2-yl)piperazine 18:** 0.400 g, 0.808 mmol, yield = 70%.  $^1\text{H}$  NMR ( $\text{CDCl}_3$ , 400 MHz):  $\delta$  = 7.36-7.21 (m, 20H,  $\text{C}_6\text{H}_5$ ), 3.77-3.72 (m, 2H, CH), 3.08 (t,  $J(\text{HH})$  = 4.0, 2H,  $\text{CH}_2$ ), 3.06-2.88 (m, 6H,  $\text{CH}_2$ ), 2.78-2.71 (m, 4H, piperazine  $\text{CH}_2$ ).  $^{13}\text{C}\{^1\text{H}\}$  NMR ( $\text{CDCl}_3$ , 125.7 MHz):  $\delta$  = 138.9, 131.9, 129.8, 128.4, 128.1, 126.6, 123.5, 87.4, 86.9, 60.1, 49.6, 40.1.

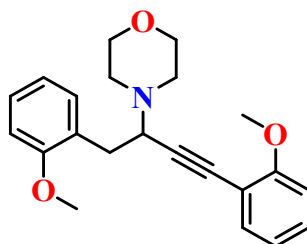

**4-(1,4-bis(2-methoxyphenyl)but-3-yn-2-yl)morpholine 19:** 0.368 g, 1.05 mmol, yield = 90%.  $^1\text{H}$  NMR ( $\text{CDCl}_3$ , 500 MHz):  $\delta$  = 7.33-7.22 (m, 4H,  $\text{C}_6\text{H}_5$ ), 6.92-6.83 (m, 4H,  $\text{C}_6\text{H}_5$ ), 3.92-3.89 (m, 1H,  $\text{CH}$ ), 3.84 (s, 3H,  $\text{CH}_3$ ), 3.83 (s, 3H,  $\text{CH}_3$ ), 3.80-3.74 (m, 4H, morpholine  $\text{CH}_2$ ), 3.22-3.18 (m, 1H,  $\text{CH}_2$ ), 2.93-2.84 (m, 3H, morpholine  $\text{CH}_2$ ,  $\text{CH}_2$ ), 2.71-2.68 (m, 2H, morpholine  $\text{CH}_2$ ).  $^{13}\text{C}\{^1\text{H}\}$  NMR ( $\text{CDCl}_3$ , 125.7 MHz):  $\delta$  = 160.2, 157.9, 133.7, 131.8, 129.4, 127.8, 126.9, 120.5, 120.3, 112.9, 110.9, 110.3, 91.5, 82.9, 67.4, 58.4, 55.9, 55.4, 50.0, 34.0. HRMS (+ ESI): calcd  $m/z$  for  $[\text{M}+\text{H}]^+$   $\text{C}_{22}\text{H}_{26}\text{NO}_3^+$ : 352.1907, found: 352.1915.

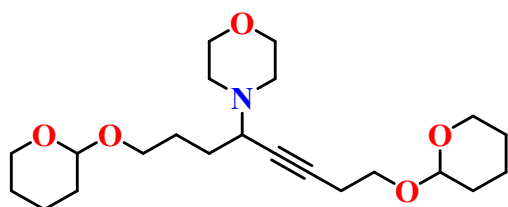

**4-(1,8-bis((tetrahydro-2H-pyran-2-yl)oxy)oct-5-yn-4-yl)morpholine 20:** 0.300 g, 0.760 mmol, yield = 65%.  $^1\text{H}$  NMR ( $\text{CDCl}_3$ , 400 MHz):  $\delta$  = 4.63 (s, 1H,  $\text{CH}$ ), 4.54 (s, 1H,  $\text{CH}$ ), 3.86-3.69 (m, 8H,  $\text{CH}_2$ ), 3.51-3.34 (m, 4H, morpholine  $\text{CH}_2$ ), 3.23 (d,  $J(\text{HH}) = 16.0$ , 1H,  $\text{CH}$ ), 2.60-2.47 (m, 6H,  $\text{CH}_2$ ), 1.79-1.50 (m, 16H,  $\text{CH}_2$ ).  $^{13}\text{C}\{^1\text{H}\}$  NMR ( $\text{CDCl}_3$ , 125.7 MHz):  $\delta$  = 99.1, 98.9, 83.2, 78.2, 67.3, 67.2, 66.2, 62.4, 62.2, 57.7, 52.4, 49.7, 47.8, 47.1, 30.9, 30.7, 29.8, 26.9, 25.6, 25.6, 20.3, 19.7, 19.5. HRMS (+ ESI): calcd  $m/z$  for  $[\text{M}+\text{Na}]^+$   $\text{C}_{22}\text{H}_{37}\text{NO}_5\text{Na}^+$ : 418.2564, found: 418.2559.

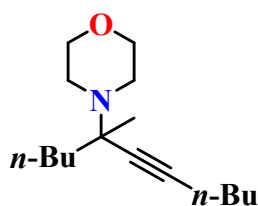

**4-(5-methylundec-6-yn-5-yl)morpholine<sup>4</sup> 21:** 0.280 g, 1.11 mmol, yield = 96%.  $^1\text{H}$  NMR ( $\text{CDCl}_3$ , 500 MHz):  $\delta$  = 3.68 (t,  $J(\text{HH}) = 5.0$ , 4H, morpholine  $\text{CH}_2$ ), 2.57-2.54 (m, 4H, morpholine  $\text{CH}_2$ ), 2.15 (t,  $J(\text{HH}) = 10.0$ , 2H,  $\text{CH}_2$ ), 1.54 (m, 2H,  $\text{CH}_2$ ), 1.44 (m, 2H,  $\text{CH}_2$ ), 1.39-1.35 (m, 4H,  $\text{CH}_2$ ), 1.28-1.25 (m, 2H,  $\text{CH}_2$ ), 1.21 (s, 3H,  $\text{CH}_3$ ), 0.87 (t,  $J(\text{HH}) = 5.0$ , 6H,  $\text{CH}_3$ ).

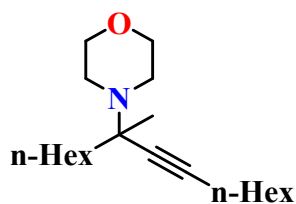

**4-(7-methylpentadec-8-yn-7-yl)morpholine<sup>4</sup> 22:** 0.322 g, 1.05 mmol, yield = 90%. <sup>1</sup>H NMR (CDCl<sub>3</sub>, 500 MHz):  $\delta$  = 3.63 (t,  $J(\text{HH})$  = 5.0, 4H, morpholine CH<sub>2</sub>), 2.54-2.49 (m, 4H, morpholine CH<sub>2</sub>), 2.11 (t,  $J(\text{HH})$  = 5.0, 2H, CH<sub>2</sub>), 1.51-1.48 (m, 2H, CH<sub>2</sub>), 1.43-1.39 (m, 2H, CH<sub>2</sub>), 1.34-1.31 (m, 4H, CH<sub>2</sub>), 1.21 (br s, 10H, CH<sub>2</sub>), 1.17 (s, 3H, CH<sub>3</sub>), 0.81 (q,  $J(\text{HH})$  = 5.0, 6H, CH<sub>3</sub>).

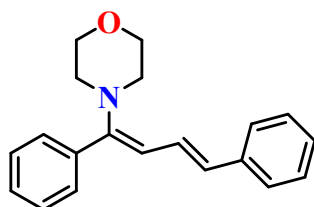

**4-((1Z,3E)-1,4-diphenylbuta-1,3-dien-1-yl)morpholine<sup>9</sup> 23:** 0.290 g, 0.995 mmol, yield = 86%. <sup>1</sup>H NMR (CDCl<sub>3</sub>, 500 MHz):  $\delta$  = 7.50-7.45 (m, 5H, C<sub>6</sub>H<sub>5</sub>), 7.27-7.25 (m, 4H, C<sub>6</sub>H<sub>5</sub>), 7.15 (t,  $J(\text{HH})$  = 5.0, 1H, C<sub>6</sub>H<sub>5</sub>), 6.74 (dd,  $J(\text{HH})$  = 15.0, 10.0, 1H, CH), 6.47 (d,  $J(\text{HH})$  = 15.0, 1H, CH), 5.69 (d,  $J(\text{HH})$  = 10.0, 1H, CH), 3.80 (t,  $J(\text{HH})$  = 5.0, 4H, morpholine CH<sub>2</sub>), 2.98 (t,  $J(\text{HH})$  = 5.0, 4H, morpholine CH<sub>2</sub>). <sup>13</sup>C{<sup>1</sup>H} NMR (CDCl<sub>3</sub>, 125.7 MHz):  $\delta$  = 152.6, 138.8, 137.0, 130.4, 128.6, 128.5, 128.5, 128.0, 126.5, 126.1, 125.7, 106.7, 67.0, 49.6.

#### 4. NMR, HRMS and IR Spectra

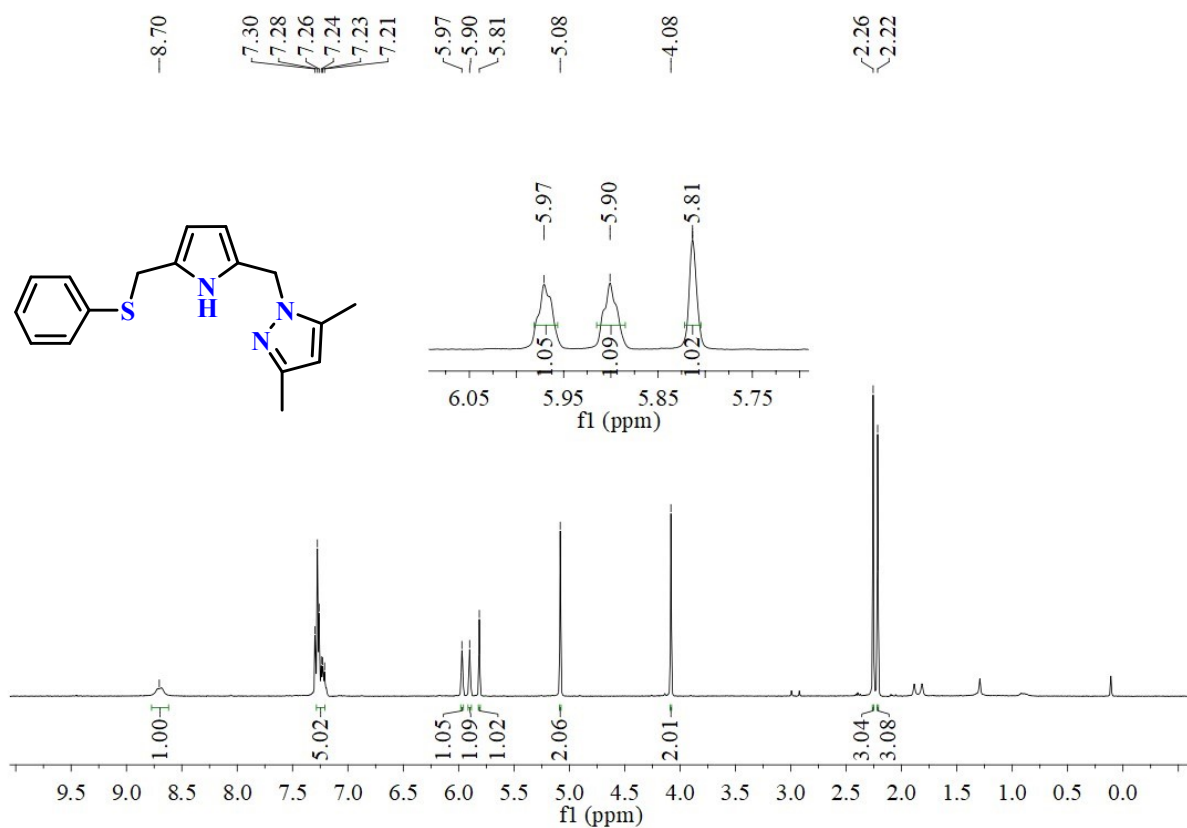

**Figure S9.**  $^1\text{H NMR}$  (25 °C, 500 MHz) spectrum of sulfane ligand **2** in  $\text{CDCl}_3$ .

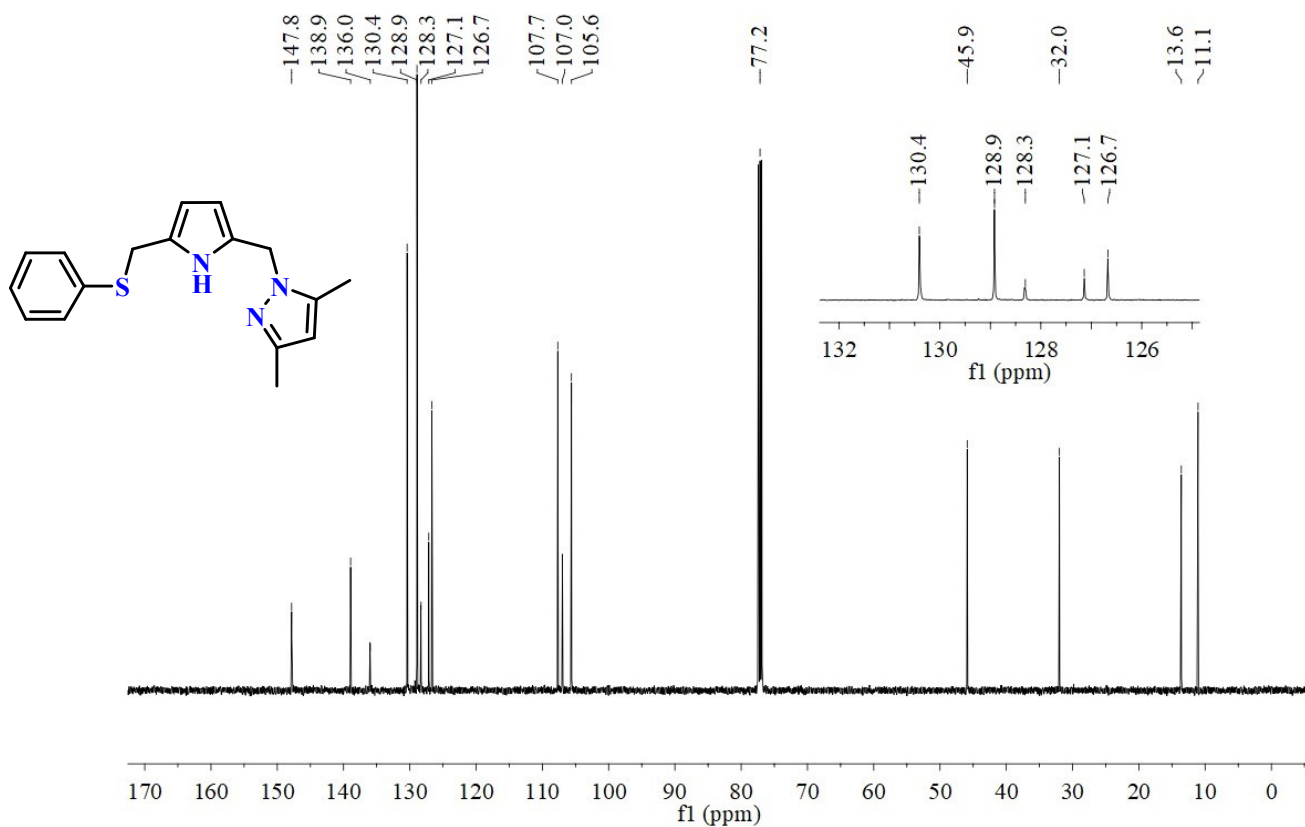

**Figure S10.**  $^{13}\text{C}\{^1\text{H}\}$  NMR (25 °C, 125.7 MHz) spectrum of the sulfane ligand **2** in  $\text{CDCl}_3$ .

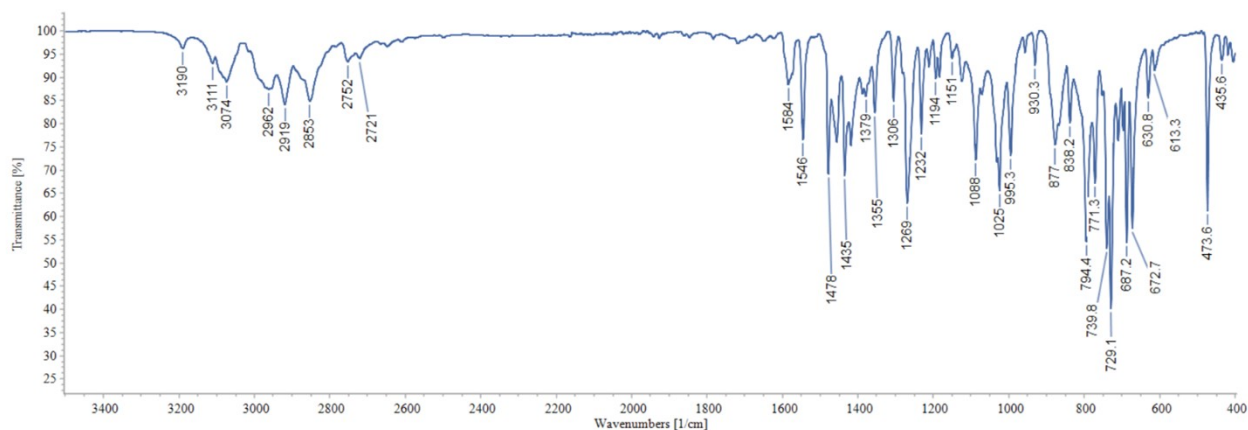

**Figure S11.** The ATR spectrum of the sulfane ligand **2**.

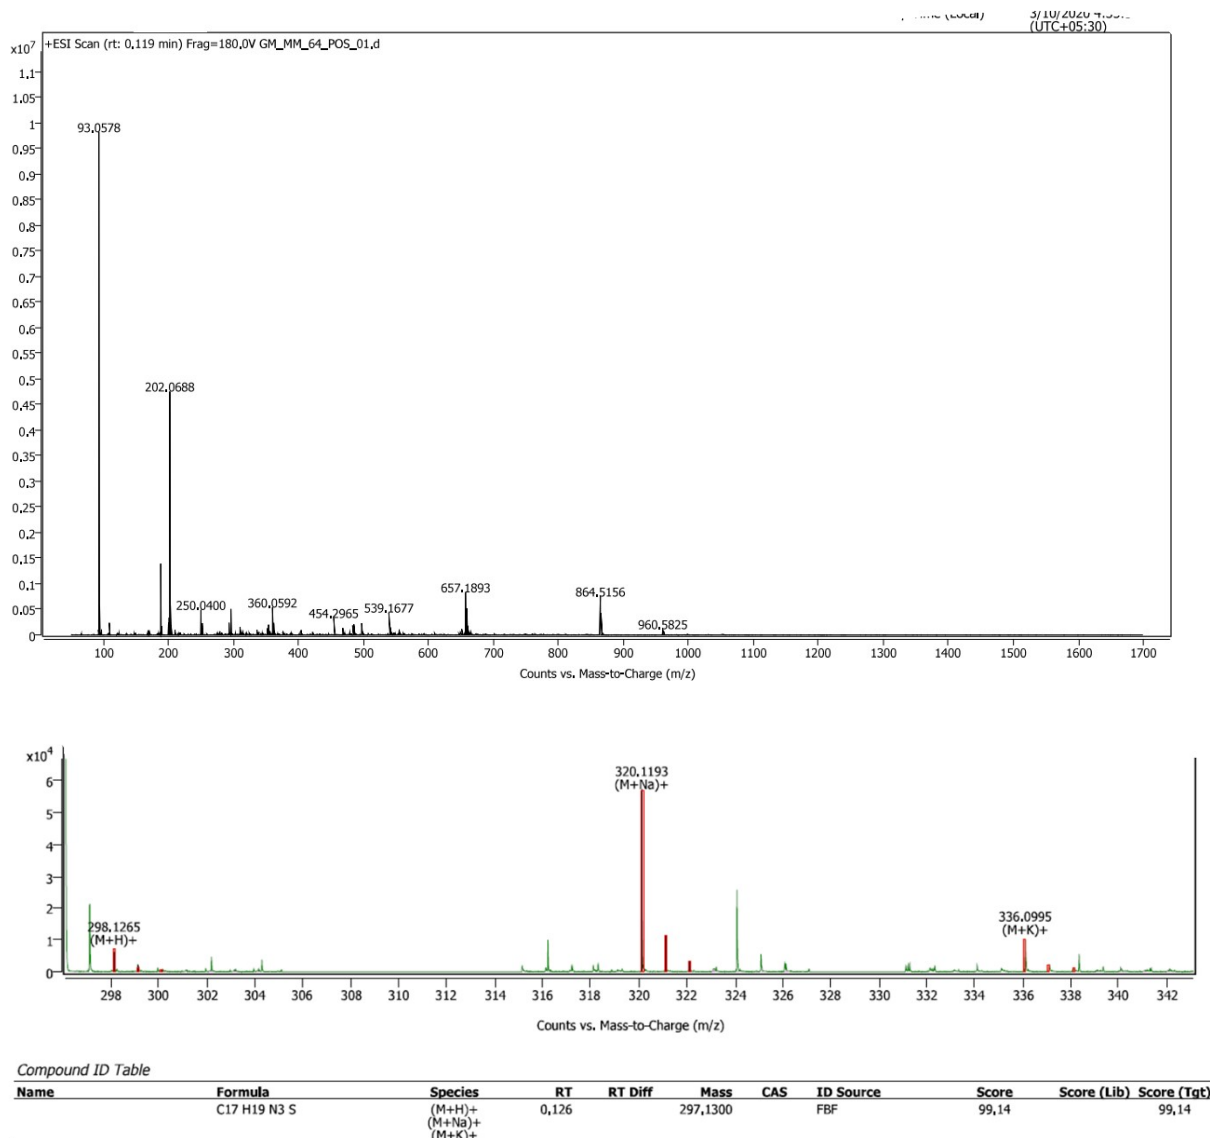

**Figure S12.** HRMS (ESI+) spectrum of the sulfane ligand **2**.

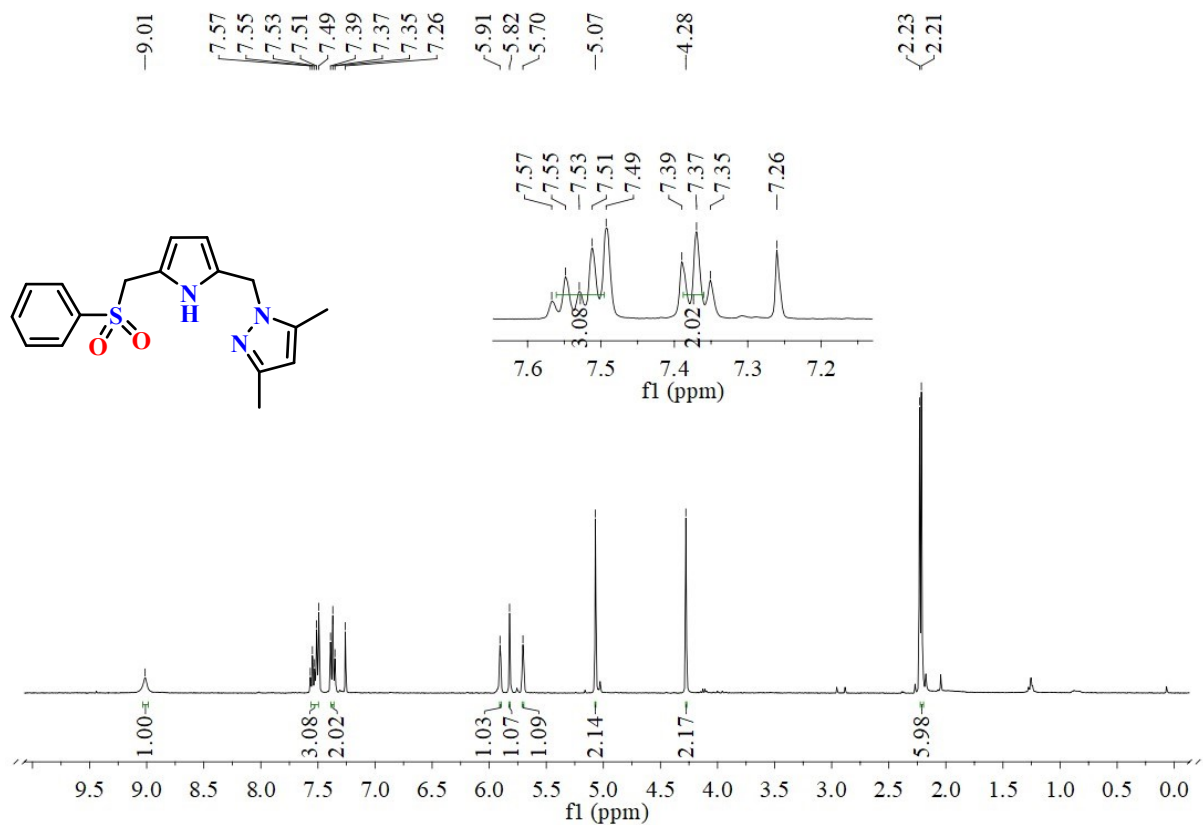

**Figure S13.** <sup>1</sup>H NMR (25 °C, 400 MHz) spectrum of the sulfone ligand **4** in CDCl<sub>3</sub>.



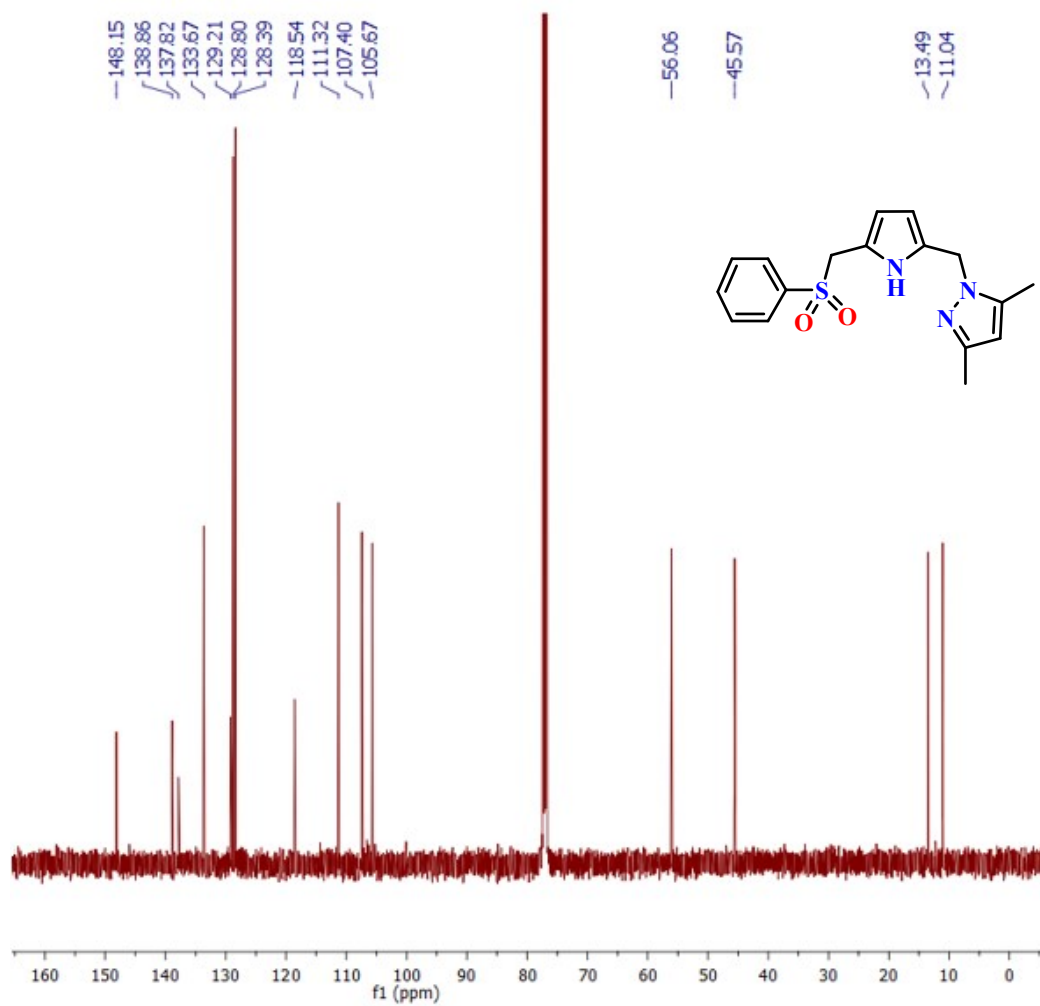

**Figure S14.**  $^{13}\text{C}\{^1\text{H}\}$  NMR (25 °C, 125.7 MHz) spectrum of the sulfone ligand **4** in  $\text{CDCl}_3$ .

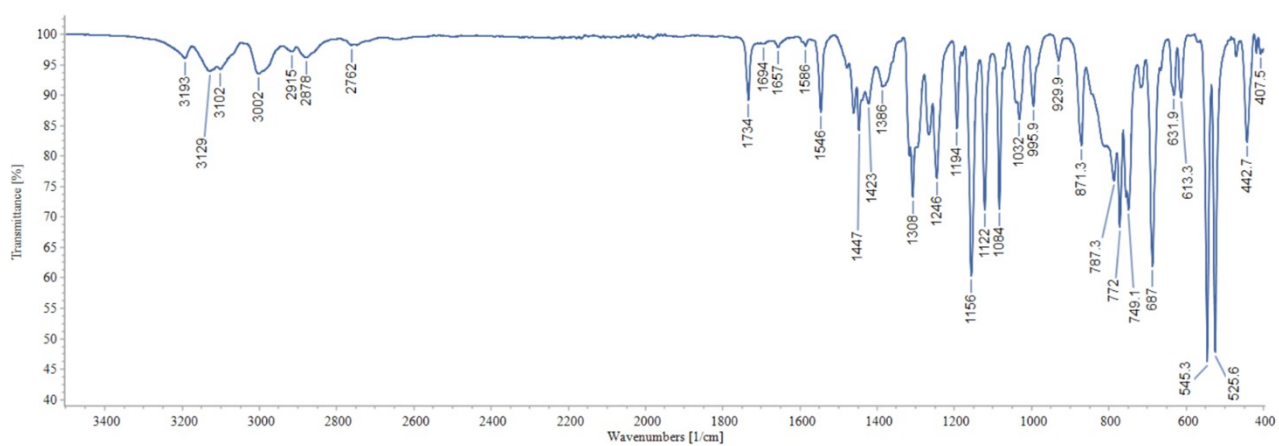

**Figure S15.** The ATR spectrum of the sulfone ligand **4**.

## Spectrum Plot Report

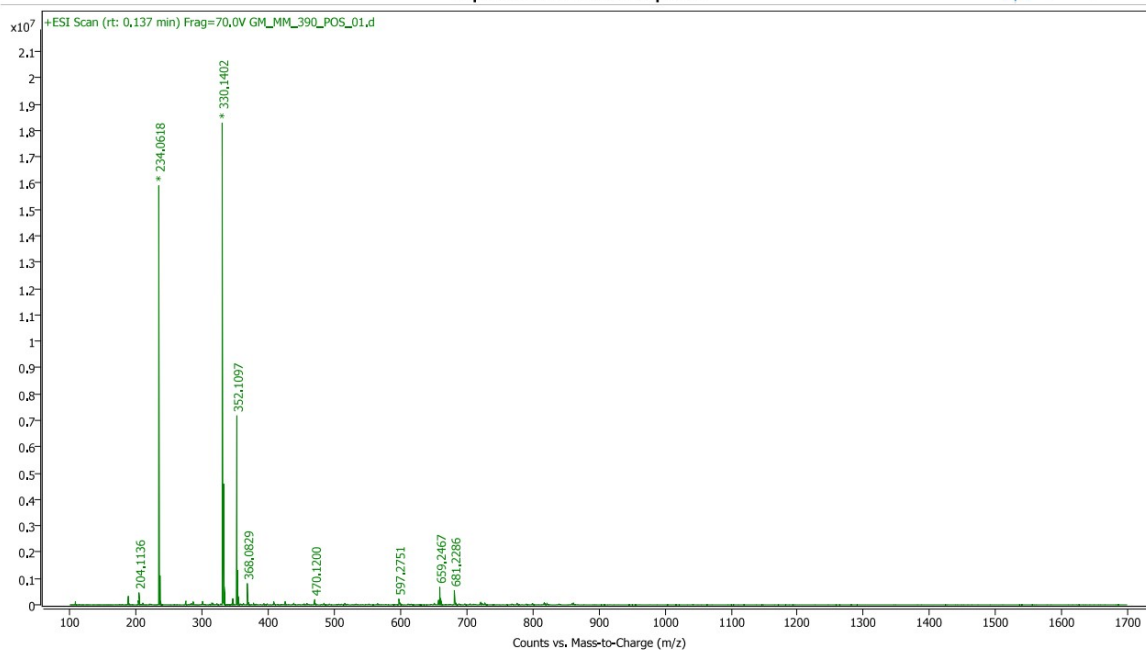

**Figure S16.** HRMS (ESI+) spectrum of the sulfone ligand **4**.

| Species             | <i>m/z</i> , Found | <i>m/z</i> , Calculated |
|---------------------|--------------------|-------------------------|
| [M+H] <sup>+</sup>  | 330.1402           | 330.1271                |
| [M+Na] <sup>+</sup> | 352.1097           | 352.1090                |
| [M+K] <sup>+</sup>  | 368.0829           | 368.0830                |

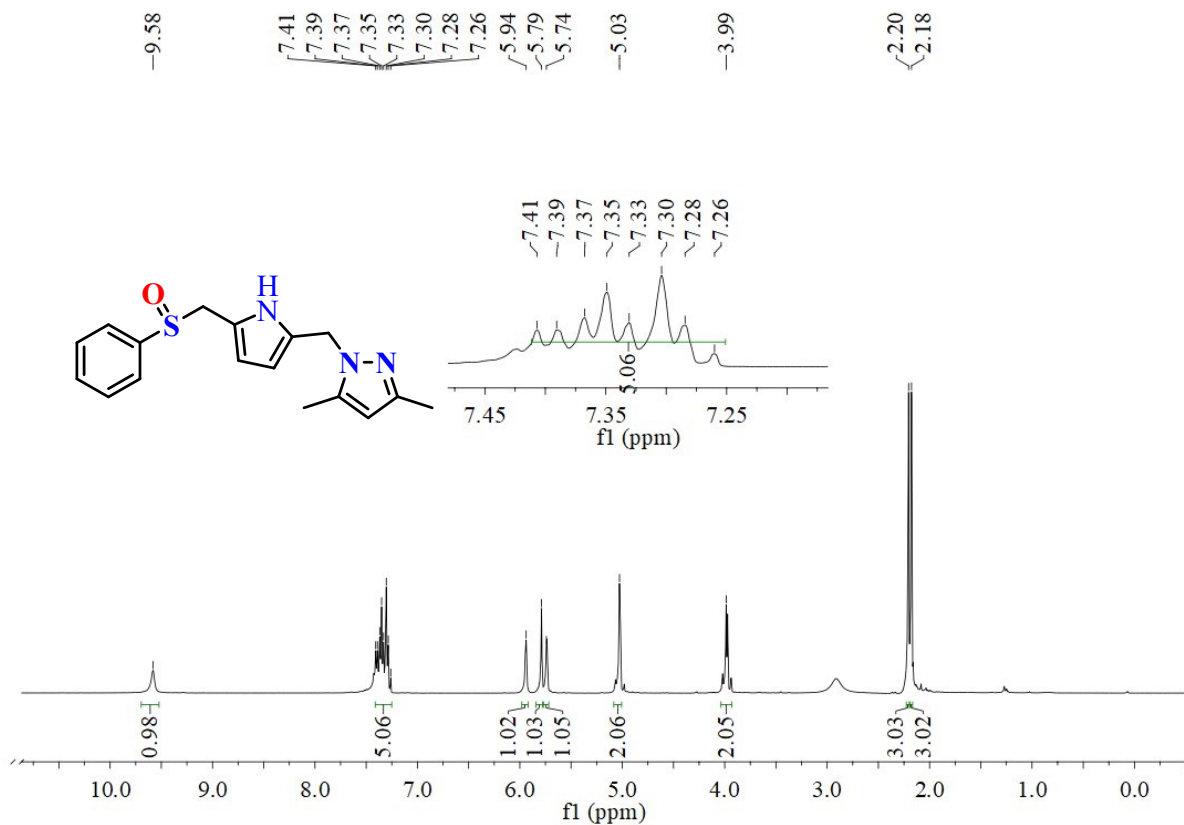

**Figure S17.**  $^1\text{H}$  NMR (25 °C, 400 MHz) spectrum of the sulfoxide **3** in  $\text{CDCl}_3$ .

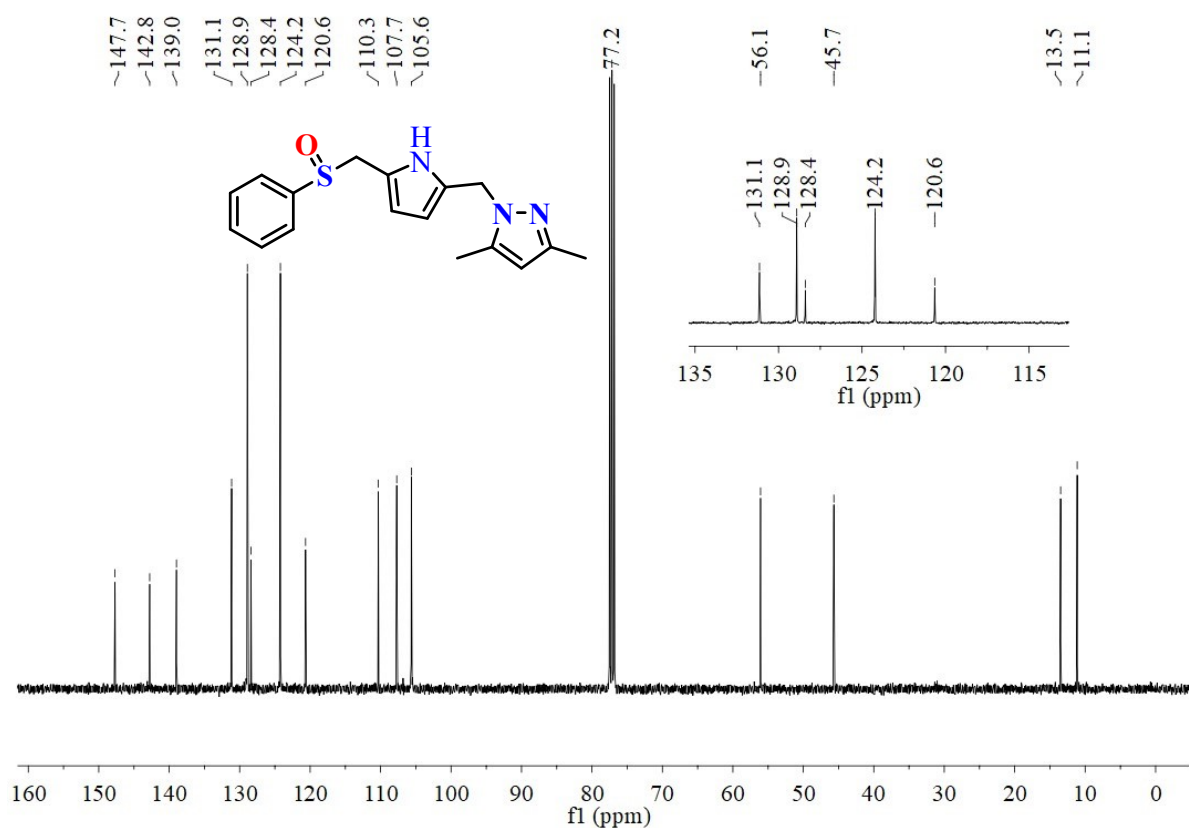

**Figure S18.**  $^{13}\text{C}\{^1\text{H}\}$  NMR (25 °C, 125.7 MHz) spectrum of the sulfoxide **3** in  $\text{CDCl}_3$ .

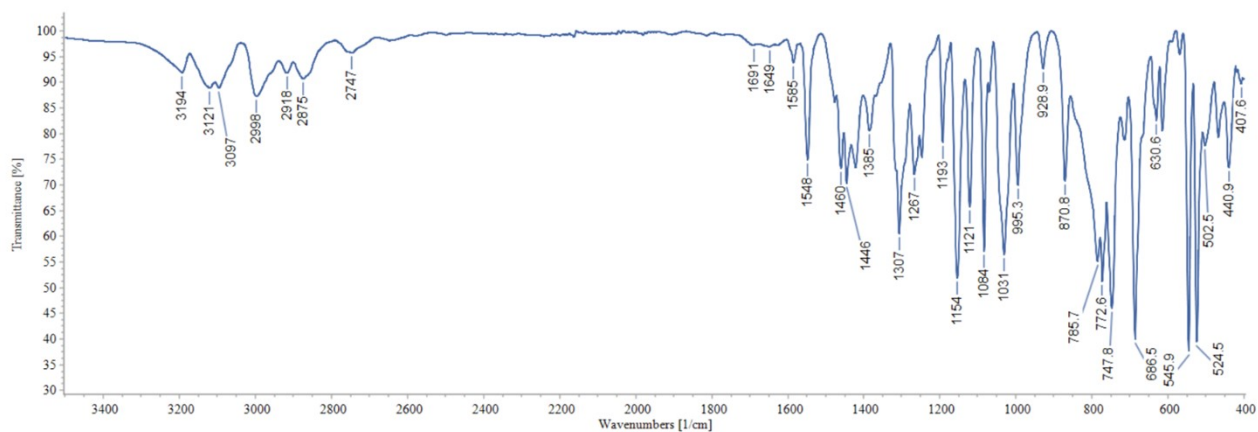

**Figure S19.** The ATR spectrum of the sulfoxide **3**.

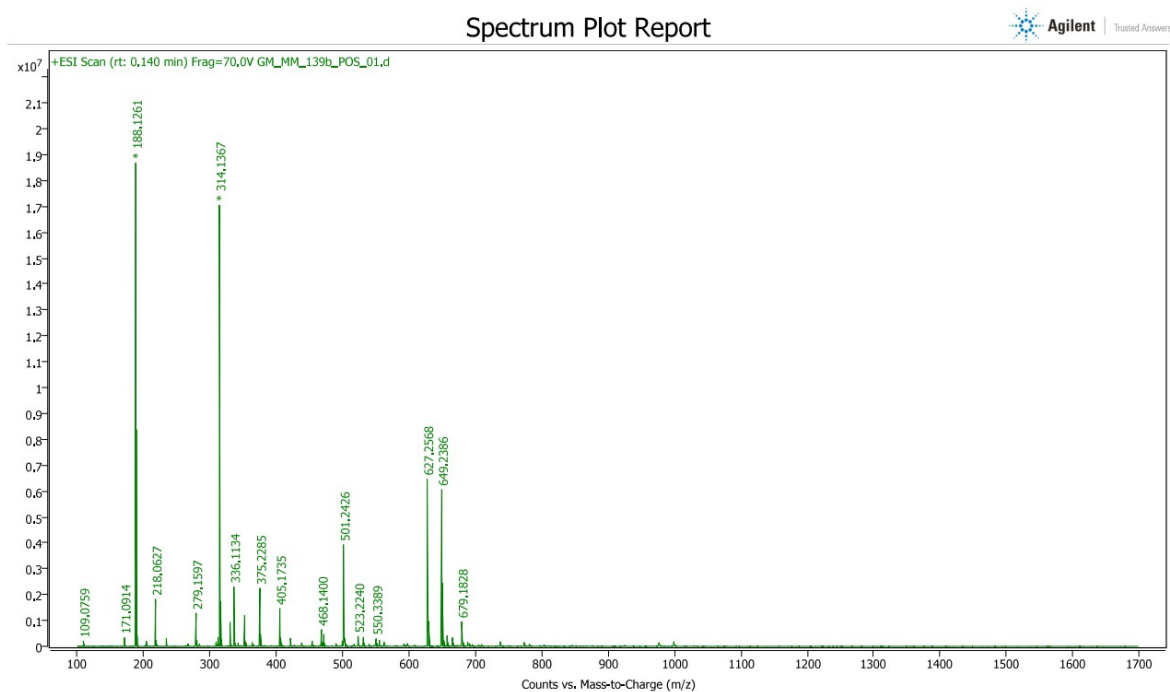

**Figure S20.** HRMS (ESI+) spectrum of the sulfoxide **3**.

| Species    | $m/z$ , Found | $m/z$ , Calculated |
|------------|---------------|--------------------|
| $[M+H]^+$  | 314.1367      | 314.1322           |
| $[M+Na]^+$ | 336.1134      | 336.1141           |

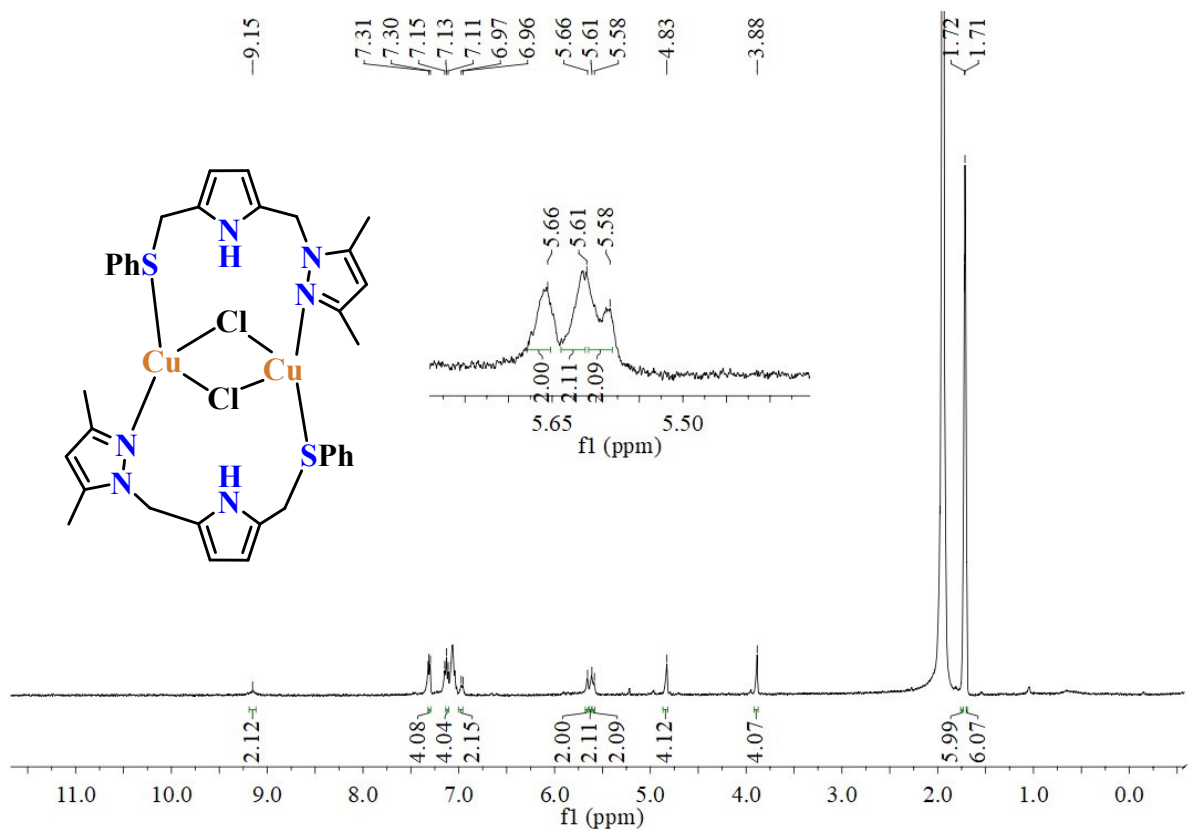

**Figure S21.** <sup>1</sup>H NMR (25 °C, 400 MHz) spectrum of complex **5** [Cu(μ-Cl){C<sub>4</sub>H<sub>3</sub>N-2-(CH<sub>2</sub>Me<sub>2</sub>pz)-5-(CH<sub>2</sub>SPh)-κ<sup>2</sup>-S,N}]<sub>2</sub> in CD<sub>3</sub>CN.

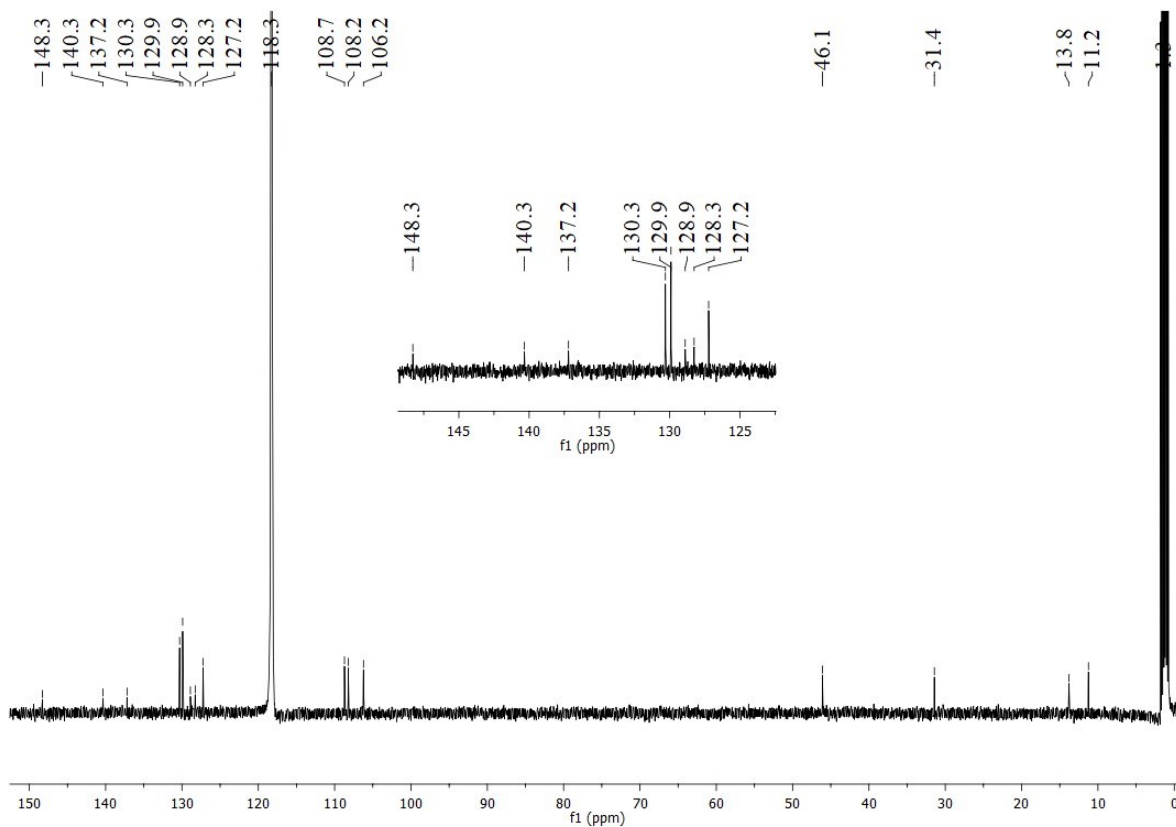

**Figure S22.**  $^{13}\text{C}\{^1\text{H}\}$  NMR (25 °C, 125.7 MHz) spectrum of complex **5**  $[\text{Cu}(\mu\text{-Cl})\{\text{C}_4\text{H}_3\text{N-2-(CH}_2\text{Me}_2\text{pz)-5-(CH}_2\text{SPh)-}\kappa^2\text{-S,N}\}_2]$  in  $\text{CD}_3\text{CN}$ .

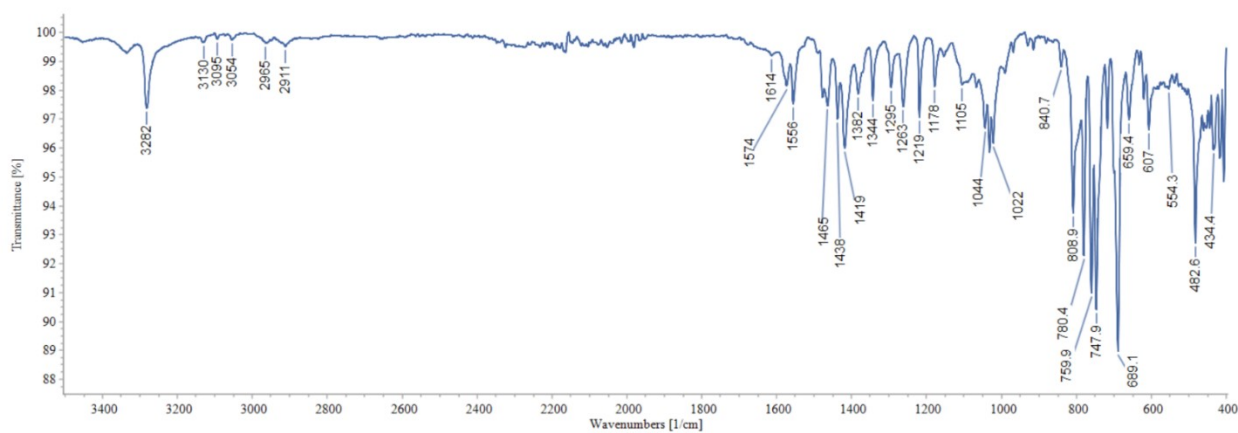

**Figure S23.** The ATR spectrum of complex **5**  $[\text{Cu}(\mu\text{-Cl})\{\text{C}_4\text{H}_3\text{N-2-(CH}_2\text{Me}_2\text{pz)-5-(CH}_2\text{SPh)-}\kappa^2\text{-S,N}\}_2]$ .

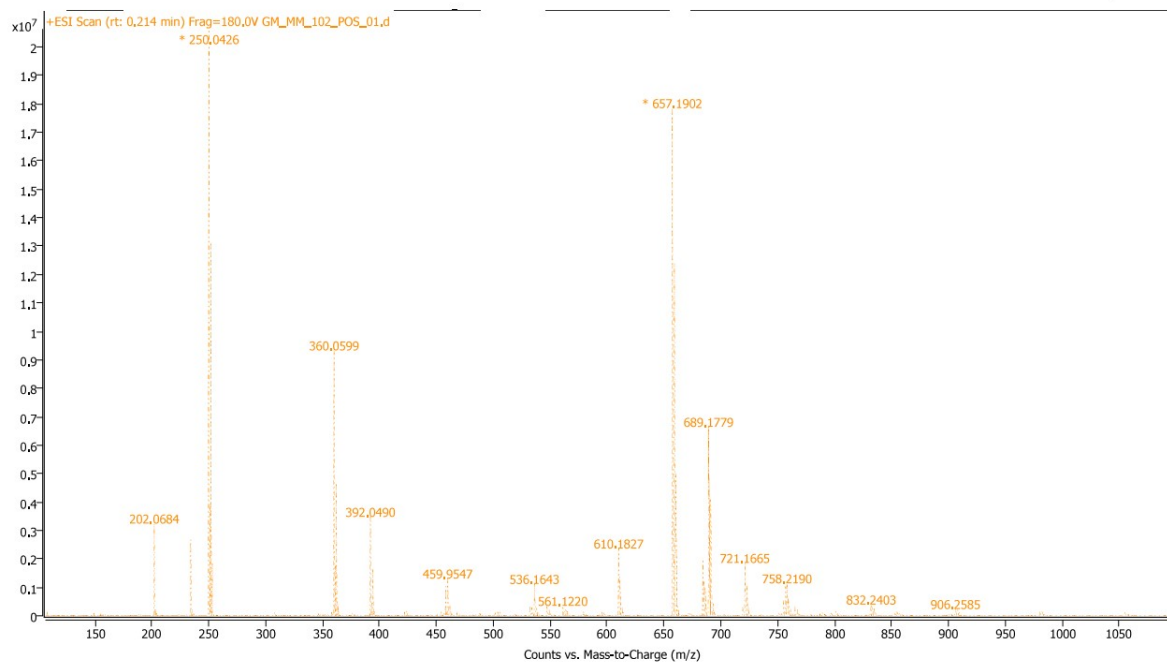

**Figure S24.** HRMS (ESI+) spectrum of complex **5**  $[\text{Cu}(\mu\text{-Cl})\{\text{C}_4\text{H}_3\text{N-2-(CH}_2\text{Me}_2\text{pz)-5-(CH}_2\text{SPh)-}\kappa^2\text{-S,N}\}]_2$ .

| Species                                                   | $m/z$ , Found | $m/z$ , Calculated |
|-----------------------------------------------------------|---------------|--------------------|
| $[\text{M-CuCl}_2]^+$                                     | 657.1902      | 657.1895           |
| $[\text{Cu}(\text{ligand } \mathbf{2})_2(\text{MeOH})]^+$ | 689.1779      | 689.2158           |
| $[\text{Cu}(\text{ligand } \mathbf{2})]^+$                | 360.0599      | 360.0596           |

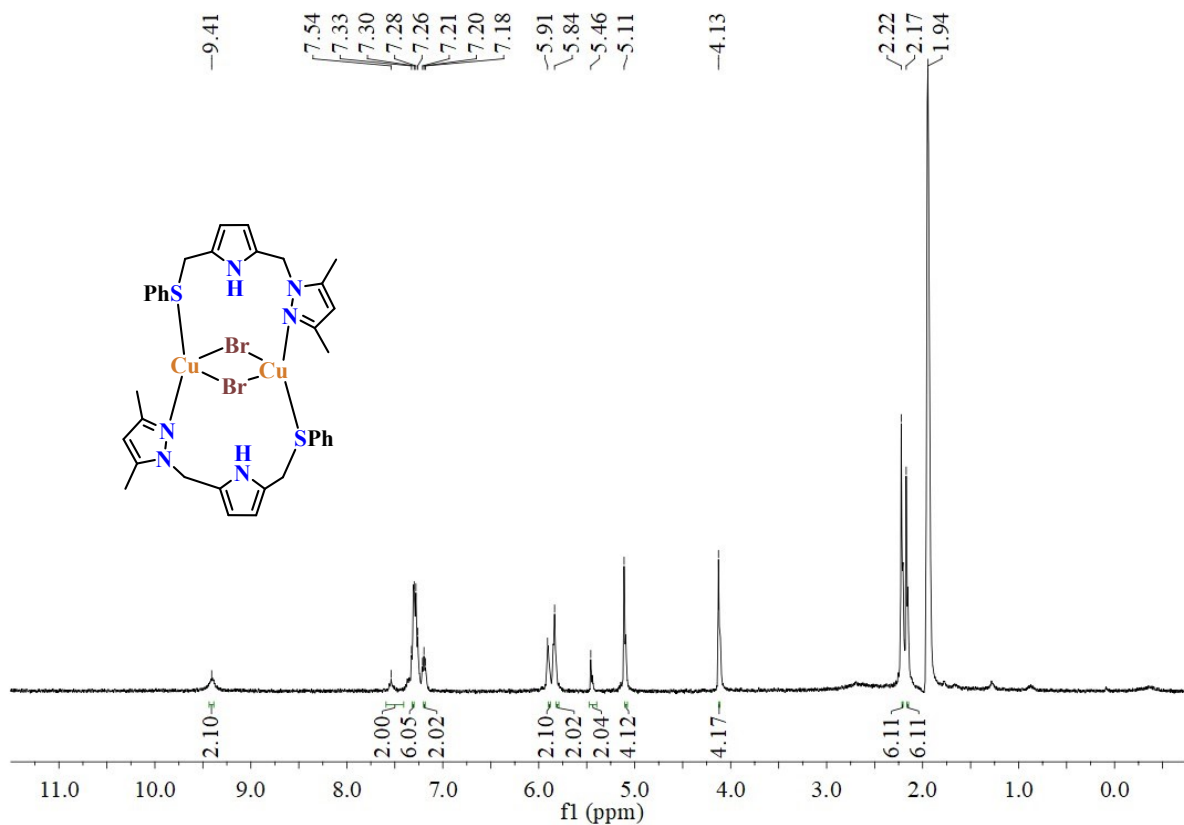

**Figure S25.** <sup>1</sup>H NMR (25 °C, 400 MHz) spectrum of complex **6** [Cu(μ-Br){C<sub>4</sub>H<sub>3</sub>N-2-(CH<sub>2</sub>Me<sub>2</sub>pz)-5-(CH<sub>2</sub>SPh)-κ<sup>2</sup>-S,N}]}<sub>2</sub> in CD<sub>3</sub>CN.



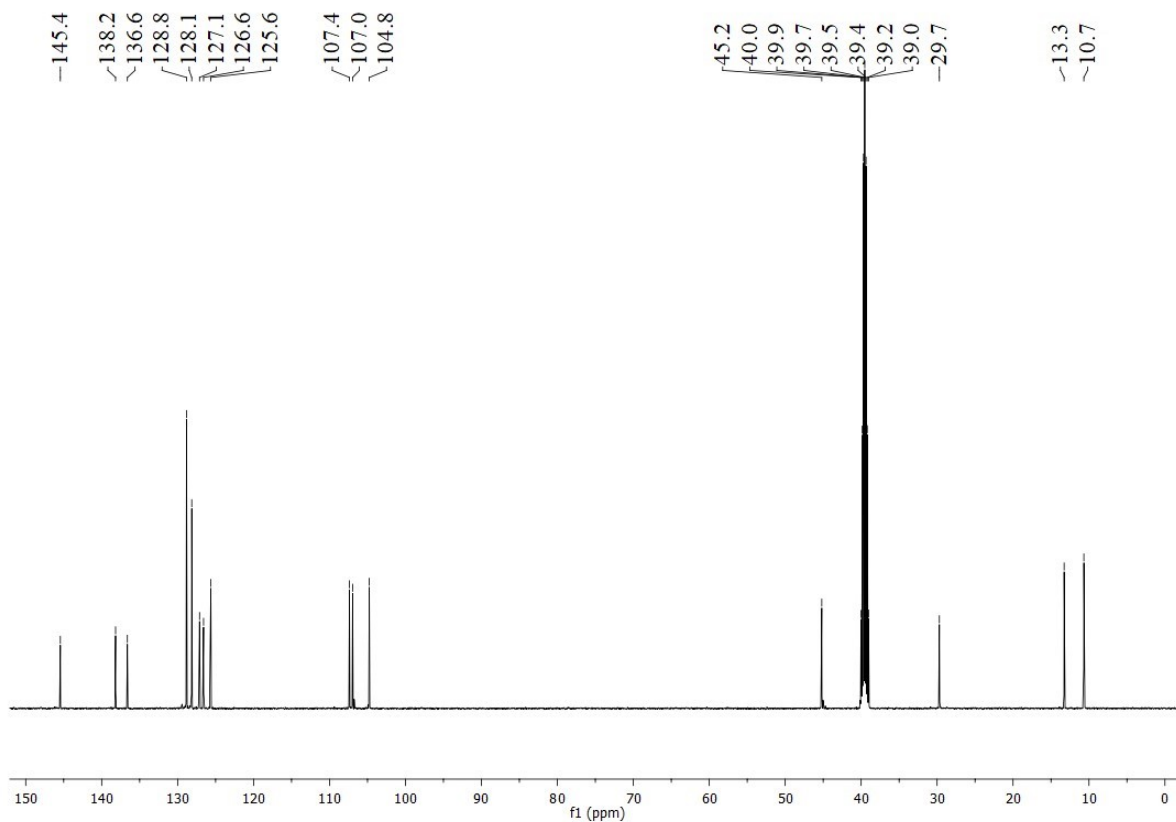

**Figure S26.**  $^{13}\text{C}\{^1\text{H}\}$  NMR (25 °C, 125.7 MHz) spectrum of complex **6**  $[\text{Cu}(\mu\text{-Br})\{\text{C}_4\text{H}_3\text{N-2-}(\text{CH}_2\text{Me}_2\text{pz})\text{-5-}(\text{CH}_2\text{SPh})\text{-}\kappa^2\text{-S,N}\}]_2$  in  $\text{DMSO-}d_6$ .

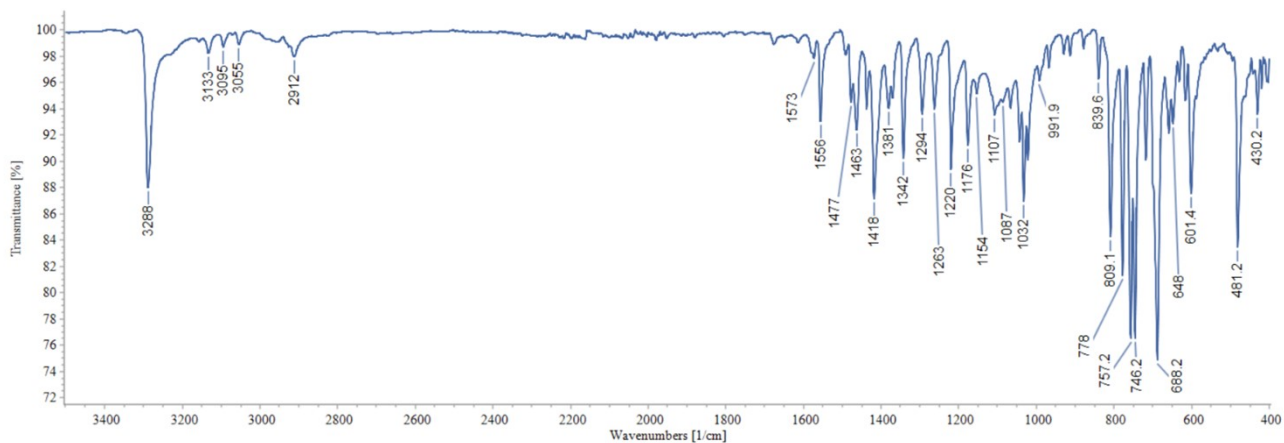

**Figure S27.** The ATR spectrum of complex **6**  $[\text{Cu}(\mu\text{-Br})\{\text{C}_4\text{H}_3\text{N-2-}(\text{CH}_2\text{Me}_2\text{pz})\text{-5-}(\text{CH}_2\text{SPh})\text{-}\kappa^2\text{-S,N}\}]_2$ .

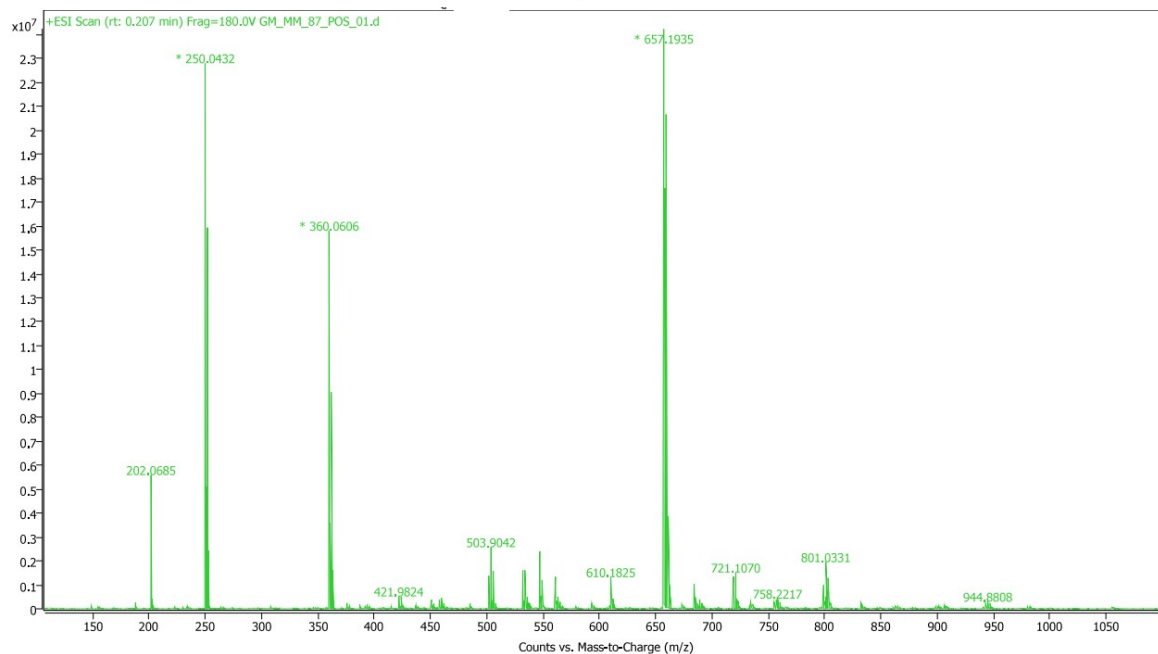

**Figure S28.** HRMS (ESI<sup>+</sup>) spectrum of complex **6** [Cu( $\mu$ -Br){C<sub>4</sub>H<sub>3</sub>N-2-(CH<sub>2</sub>Me<sub>2</sub>pz)-5-(CH<sub>2</sub>SPh)- $\kappa^2$ -S,N}]<sub>2</sub>.

| Species                                                 | <i>m/z</i> , Found | <i>m/z</i> , Calculated |
|---------------------------------------------------------|--------------------|-------------------------|
| [M-CuCl <sub>2</sub> ] <sup>+</sup>                     | 657.1935           | 657.1895                |
| [Cu(ligand <b>2</b> ) <sub>2</sub> (MeOH)] <sup>+</sup> | 689.1779           | 689.2158                |
| [Cu(ligand <b>2</b> )] <sup>+</sup>                     | 360.0606           | 360.0596                |

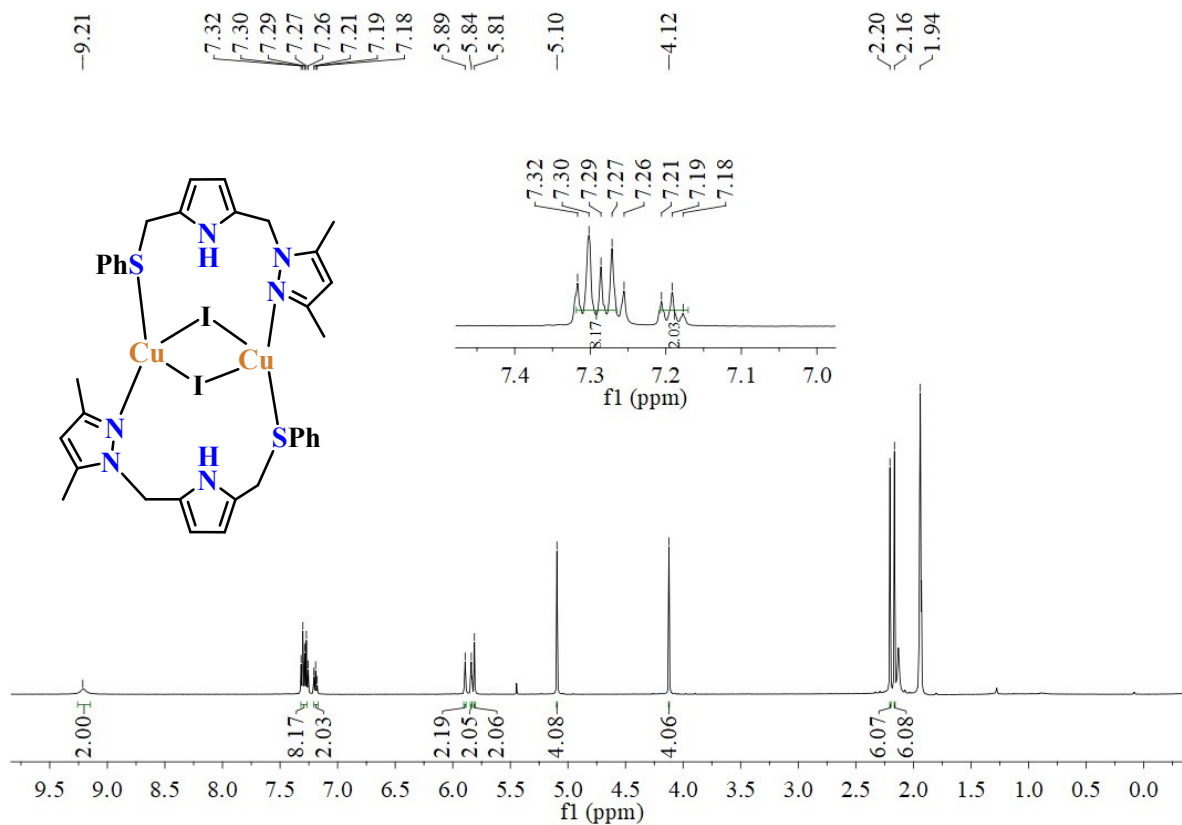

**Figure S29.**  $^1\text{H NMR}$  (25 °C, 500 MHz) spectrum of complex 7  $[\text{Cu}(\mu\text{-I})\{\text{C}_4\text{H}_3\text{N}-2-(\text{CH}_2\text{Me}_2\text{pz})-5-(\text{CH}_2\text{SPh})-\kappa^2\text{-S,N}\}]_2$  in  $\text{CD}_3\text{CN}$ .

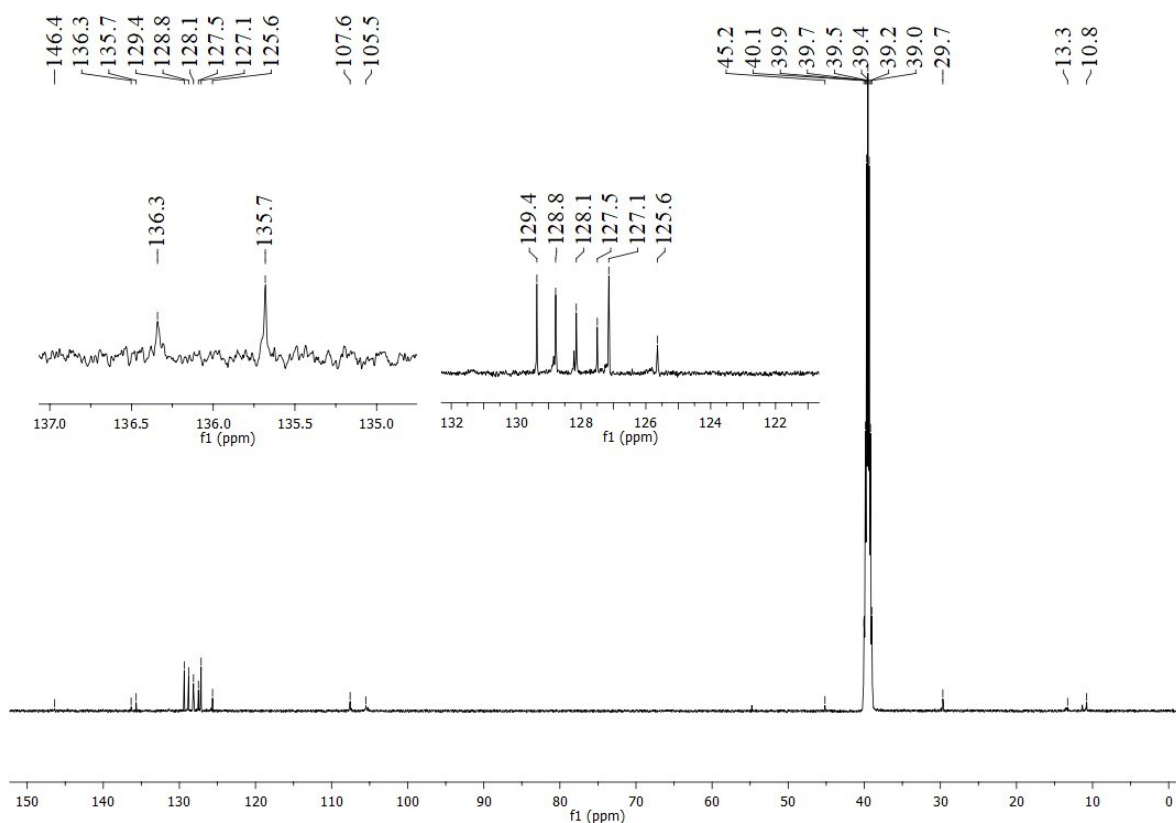

**Figure S30.**  $^{13}\text{C}\{^1\text{H}\}$  NMR (25 °C, 125.7 MHz) spectrum of complex **7**  $[\text{Cu}(\mu\text{-I})\{\text{C}_4\text{H}_3\text{N-2-(CH}_2\text{Me}_2\text{pz)-5-(CH}_2\text{SPh)-}\kappa^2\text{-S,N}\}_2]$  in  $\text{DMSO-}d_6$ .

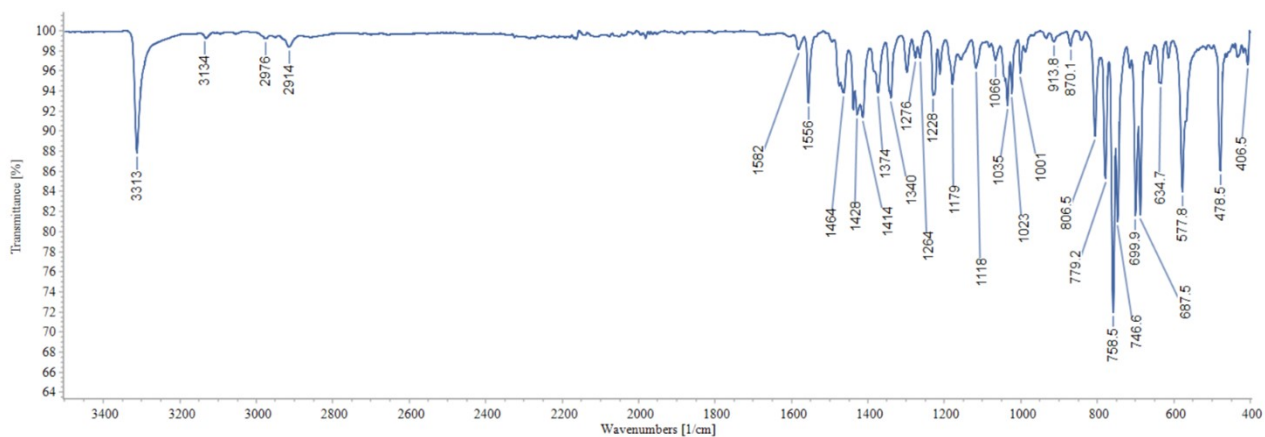

**Figure S31.** The ATR spectrum of complex **7**  $[\text{Cu}(\mu\text{-I})\{\text{C}_4\text{H}_3\text{N-2-(CH}_2\text{Me}_2\text{pz)-5-(CH}_2\text{SPh)-}\kappa^2\text{-S,N}\}_2]$ .

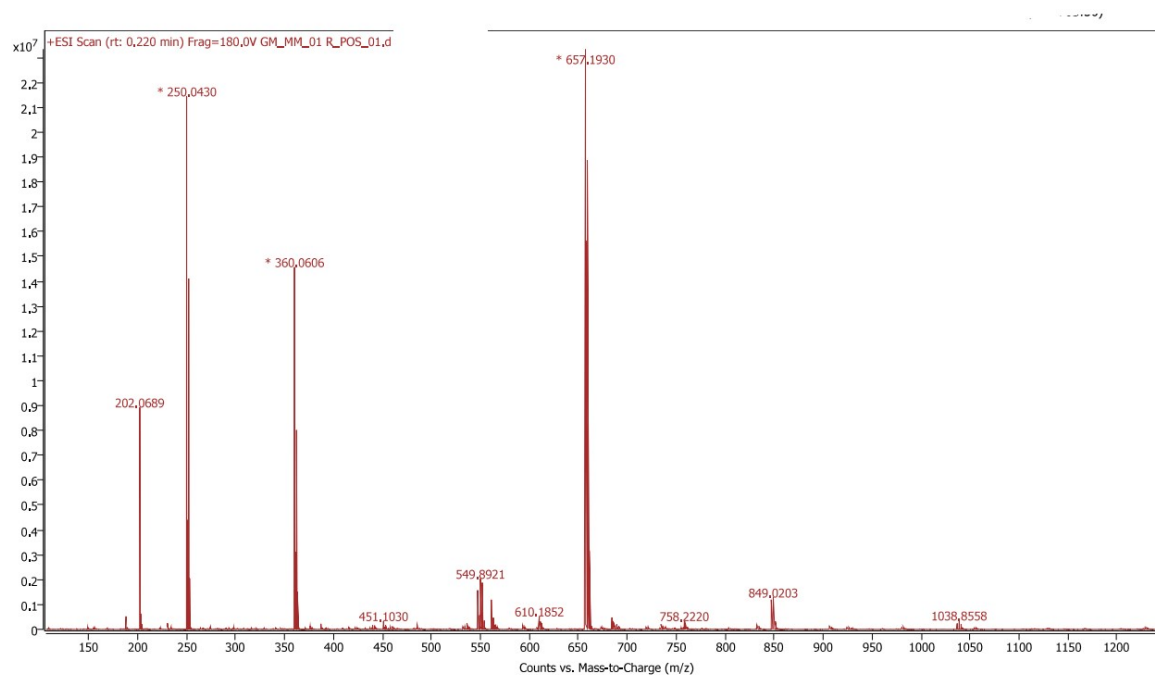

**Figure S32.** HRMS (ESI+) spectrum of complex **7** [Cu( $\mu$ -I){C<sub>4</sub>H<sub>3</sub>N-2-(CH<sub>2</sub>Me<sub>2</sub>pz)-5-(CH<sub>2</sub>SPh)- $\kappa^2$ -S,N}]<sub>2</sub>.

| Species                             | <i>m/z</i> , Found | <i>m/z</i> , Calculated |
|-------------------------------------|--------------------|-------------------------|
| [M-CuCl <sub>2</sub> ] <sup>+</sup> | 657.1930           | 657.1895                |
| [Cu(ligand <b>2</b> ) <sup>+</sup>  | 360.0606           | 360.0596                |

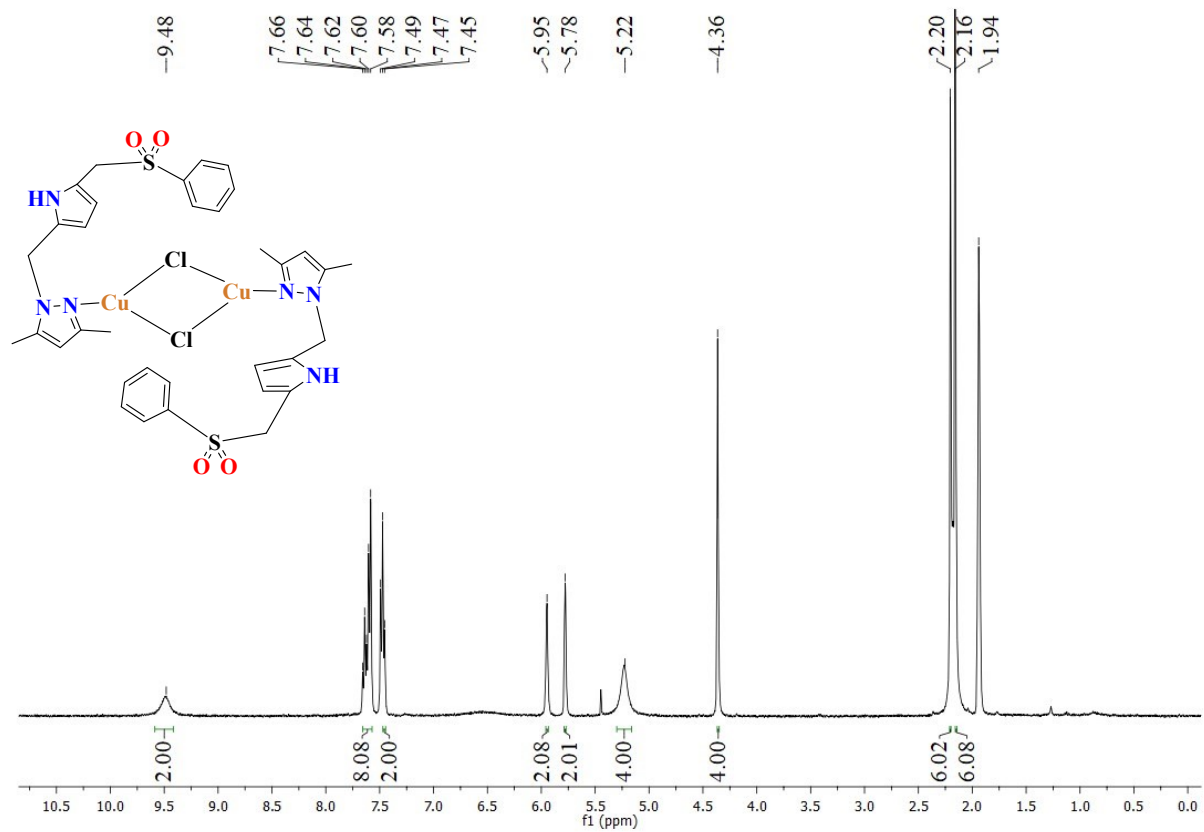

**Figure S33.** <sup>1</sup>H NMR (25 °C, 400 MHz) spectrum of complex **8** [Cu(μ-Cl){C<sub>4</sub>H<sub>3</sub>N-2-(CH<sub>2</sub>Me<sub>2</sub>pz)-5-(CH<sub>2</sub>SO<sub>2</sub>Ph)-κ<sup>1</sup>-N} ]<sub>2</sub> in CD<sub>3</sub>CN.

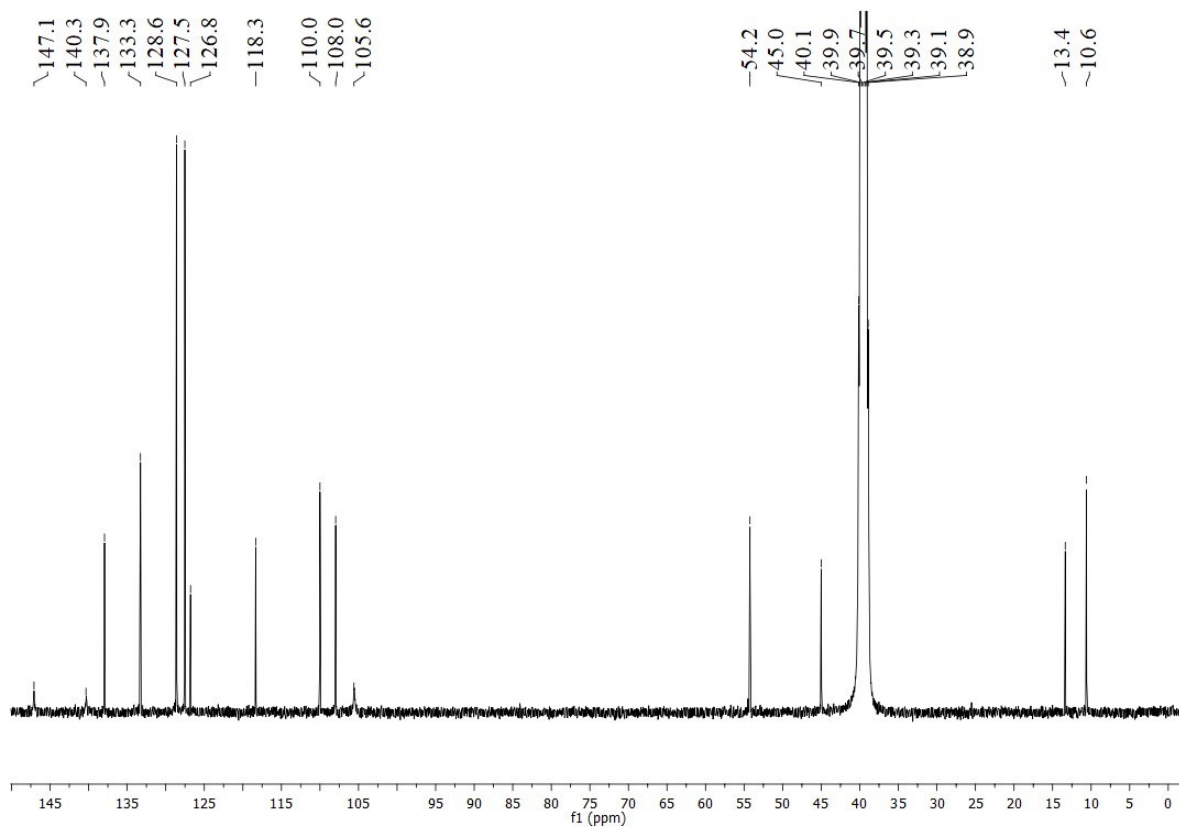

**Figure S34.**  $^{13}\text{C}\{^1\text{H}\}$  NMR (25 °C, 100.6 MHz) spectrum of complex **8**  $[\text{Cu}(\mu\text{-Cl})\{\text{C}_4\text{H}_3\text{N-2-(CH}_2\text{Me}_2\text{pz)-5-(CH}_2\text{SO}_2\text{Ph)-}\kappa^1\text{-N}\}_2]$  in  $\text{DMSO-}d_6$ .

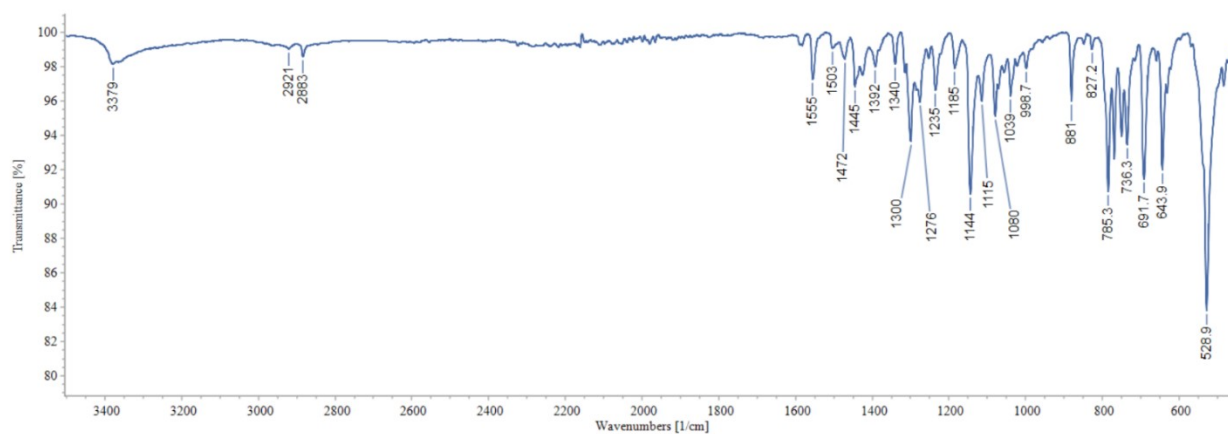

**Figure S35.** The ATR spectrum of complex **8**  $[\text{Cu}(\mu\text{-Cl})\{\text{C}_4\text{H}_3\text{N-2-(CH}_2\text{Me}_2\text{pz)-5-(CH}_2\text{SO}_2\text{Ph)-}\kappa^1\text{-N}\}_2]$ .

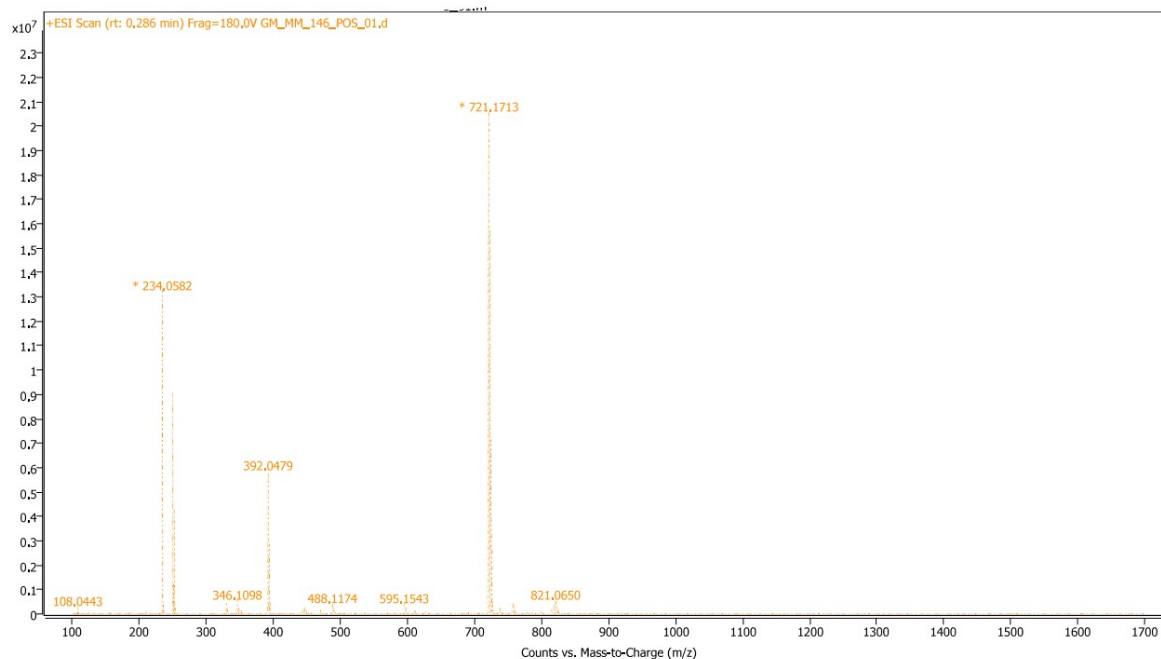

**Figure S36.** HRMS (ESI+) spectrum of complex **8**  $[\text{Cu}(\mu\text{-Cl})\{\text{C}_4\text{H}_3\text{N-2-(CH}_2\text{Me}_2\text{pz)-5-(CH}_2\text{SO}_2\text{Ph)-}\kappa^1\text{-N}\}_2]^+$ .

| Species                                                                                                                                                                                                                       | <i>m/z</i> , Found | <i>m/z</i> , Calculated |
|-------------------------------------------------------------------------------------------------------------------------------------------------------------------------------------------------------------------------------|--------------------|-------------------------|
| $[\text{Cu}\{\text{C}_4\text{H}_3\text{N-2-(CH}_2\text{Me}_2\text{pz)-5-(CH}_2\text{SO}_2\text{Ph)-}\kappa^1\text{-N}\}_2]^+$<br>(Cu(ligand <b>4</b> ) <sub>2</sub> ) <sup>+</sup>                                            | 721.1713           | 721.1692                |
| $[\text{Cu}\{\text{C}_4\text{H}_3\text{N-2-(CH}_2\text{Me}_2\text{pz)-5-(CH}_2\text{SO}_2\text{Ph)-}\kappa^1\text{-N}\}]^+$<br>(Cu(ligand <b>4</b> ) <sup>+</sup> )                                                           | 392.0479           | 392.0494                |
| $[\text{Cu}(\text{CH}_3\text{OH})_3\{\text{C}_4\text{H}_3\text{N-2-(CH}_2\text{Me}_2\text{pz)-5-(CH}_2\text{SO}_2\text{Ph)-}\kappa^1\text{-N}\}]^+$<br>(Cu(CH <sub>3</sub> OH) <sub>3</sub> (ligand <b>4</b> ) <sup>+</sup> ) | 488.1174           | 488.1280                |



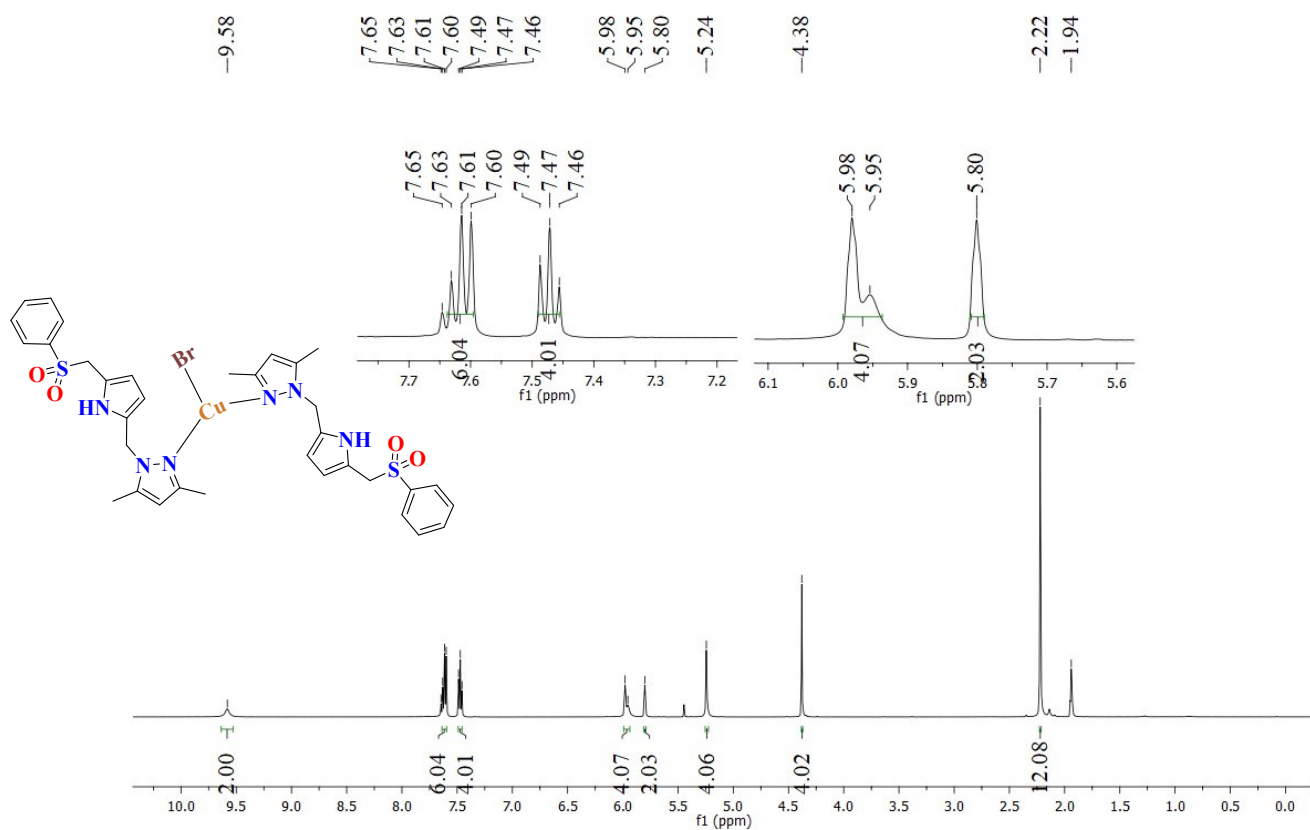

**Figure S37.** <sup>1</sup>H NMR (25 °C, 500 MHz) spectrum of complex 9 [CuBr{C<sub>4</sub>H<sub>3</sub>N-2-(CH<sub>2</sub>Me<sub>2</sub>pz)-5-(CH<sub>2</sub>SO<sub>2</sub>Ph)-κ<sup>1</sup>-N<sub>2</sub>}<sub>2</sub>] in CD<sub>3</sub>CN.

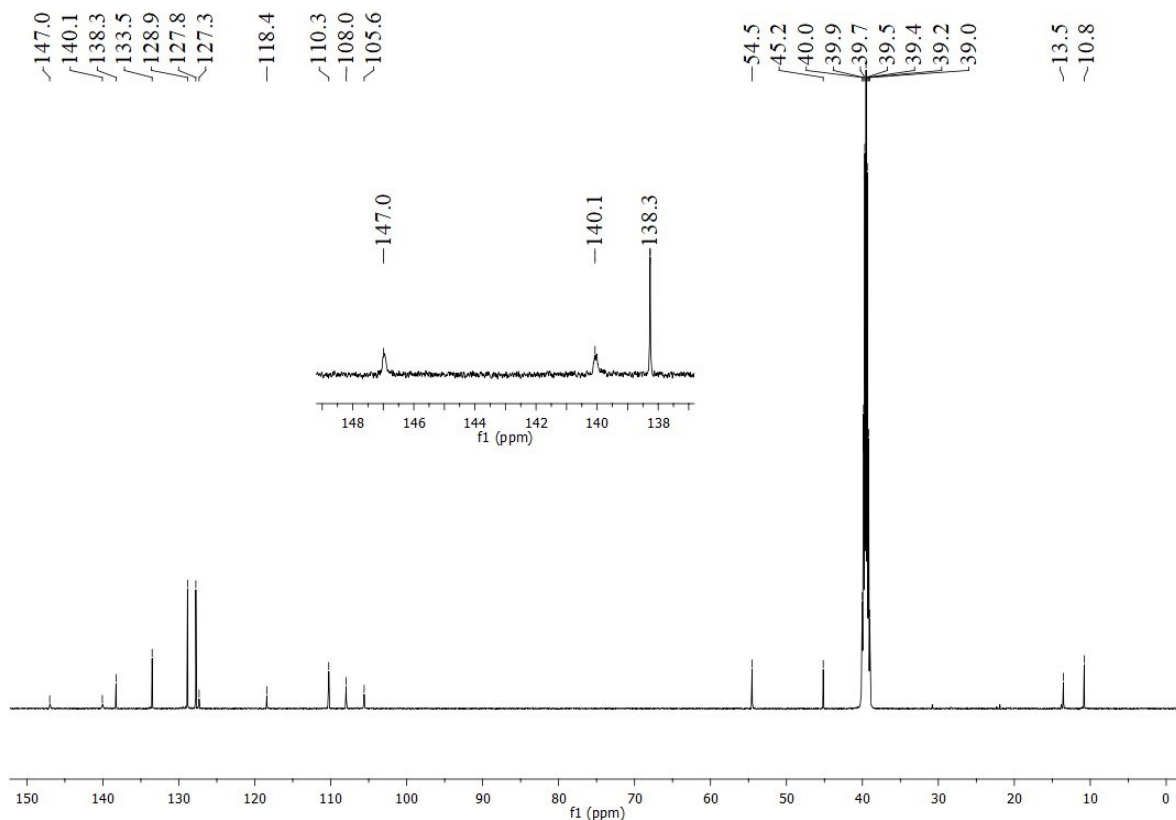

**Figure S38.**  $^{13}\text{C}\{^1\text{H}\}$  NMR (25 °C, 125.7 MHz) spectrum of complex **9** [ $\text{CuBr}\{\text{C}_4\text{H}_3\text{N}-2-(\text{CH}_2\text{Me}_2\text{pz})-5-(\text{CH}_2\text{SO}_2\text{Ph})-\kappa^1-\text{N}\}_2$ ] in  $\text{DMSO}-d_6$ .

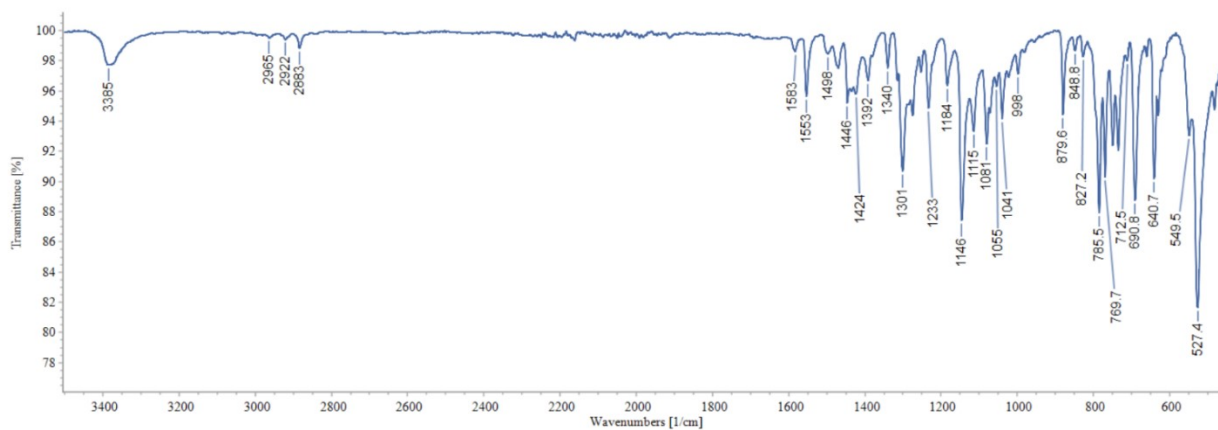

**Figure S39.** The ATR spectrum of complex **9** [ $\text{CuBr}\{\text{C}_4\text{H}_3\text{N}-2-(\text{CH}_2\text{Me}_2\text{pz})-5-(\text{CH}_2\text{SO}_2\text{Ph})-\kappa^1-\text{N}\}_2$ ].

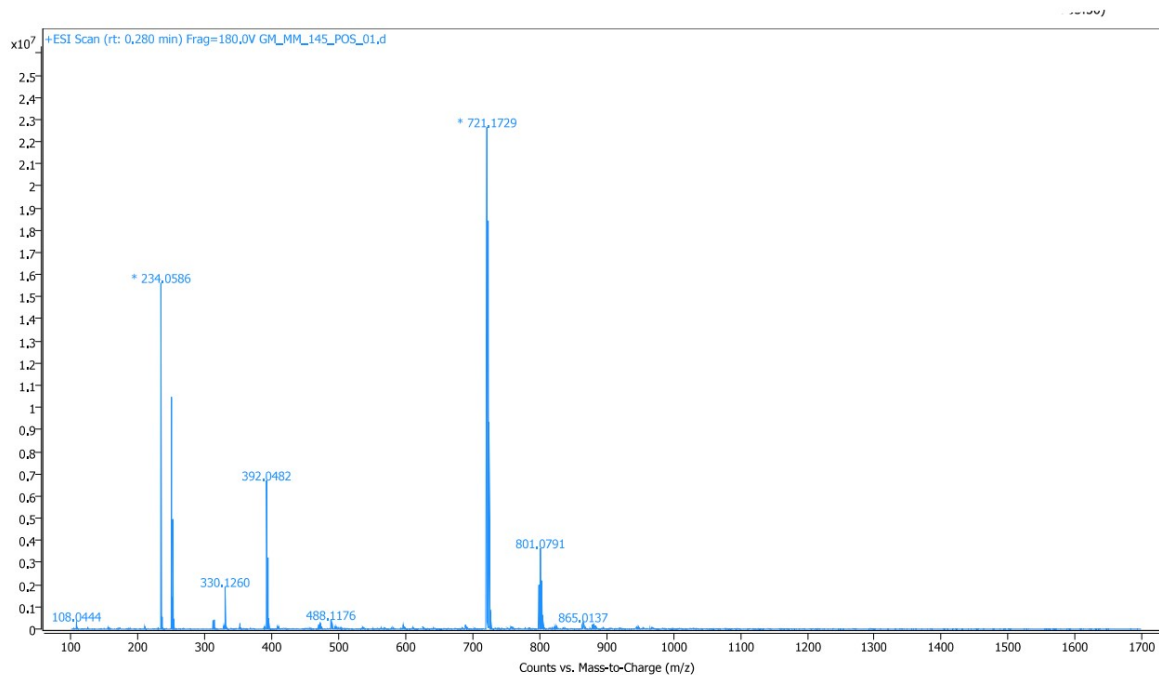

**Figure S40.** HRMS (ESI<sup>+</sup>) spectrum of complex **9** [CuBr{C<sub>4</sub>H<sub>3</sub>N-2-(CH<sub>2</sub>Me<sub>2</sub>pz)-5-(CH<sub>2</sub>SO<sub>2</sub>Ph)-κ<sup>1</sup>-N<sub>2</sub>}<sub>2</sub>].

| Species                                                                                                                                                                                                                                                                      | <i>m/z</i> , Found | <i>m/z</i> , Calculated |
|------------------------------------------------------------------------------------------------------------------------------------------------------------------------------------------------------------------------------------------------------------------------------|--------------------|-------------------------|
| [Cu{C <sub>4</sub> H <sub>3</sub> N-2-(CH <sub>2</sub> Me <sub>2</sub> pz)-5-(CH <sub>2</sub> SO <sub>2</sub> Ph)-κ <sup>1</sup> -N <sub>2</sub> } <sub>2</sub> ] <sup>+</sup><br>(Cu(ligand <b>4</b> ) <sub>2</sub> ) <sup>+</sup>                                          | 721.1729           | 721.1692                |
| [Cu{C <sub>4</sub> H <sub>3</sub> N-2-(CH <sub>2</sub> Me <sub>2</sub> pz)-5-(CH <sub>2</sub> SO <sub>2</sub> Ph)-κ <sup>1</sup> -N <sub>2</sub> }] <sup>+</sup><br>(Cu(ligand <b>4</b> ) <sup>+</sup> )                                                                     | 392.0482           | 392.0494                |
| [Cu(CH <sub>3</sub> OH) <sub>3</sub> {C <sub>4</sub> H <sub>3</sub> N-2-(CH <sub>2</sub> Me <sub>2</sub> pz)-5-(CH <sub>2</sub> SO <sub>2</sub> Ph)-κ <sup>1</sup> -N <sub>2</sub> }] <sup>+</sup><br>(Cu(CH <sub>3</sub> OH) <sub>3</sub> (ligand <b>4</b> ) <sup>+</sup> ) | 488.1176           | 488.1280                |

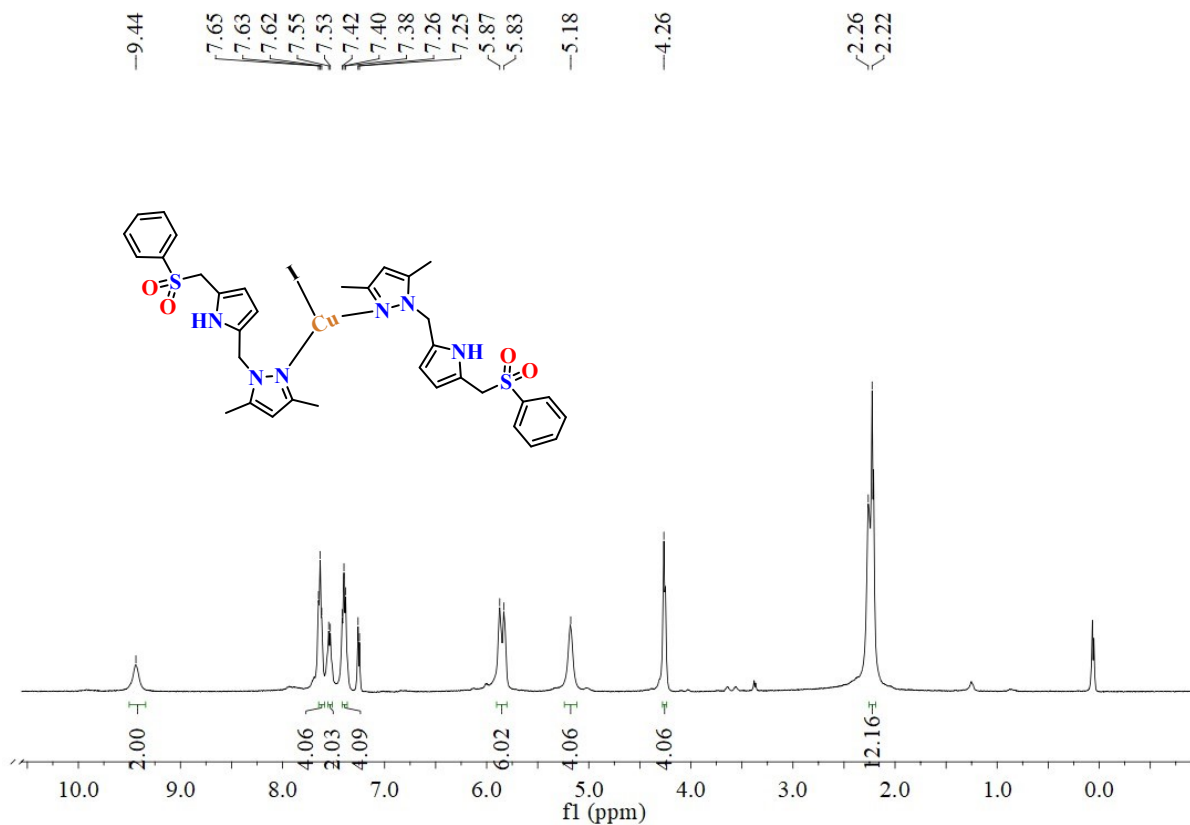

**Figure S41.** <sup>1</sup>H NMR (25 °C, 400 MHz) spectrum of complex **10** [CuI{C<sub>4</sub>H<sub>3</sub>N-2-(CH<sub>2</sub>Me<sub>2</sub>pz)-5-(CH<sub>2</sub>SO<sub>2</sub>Ph)-κ<sup>1</sup>-N<sub>2</sub>}<sub>2</sub>] in CDCl<sub>3</sub>.

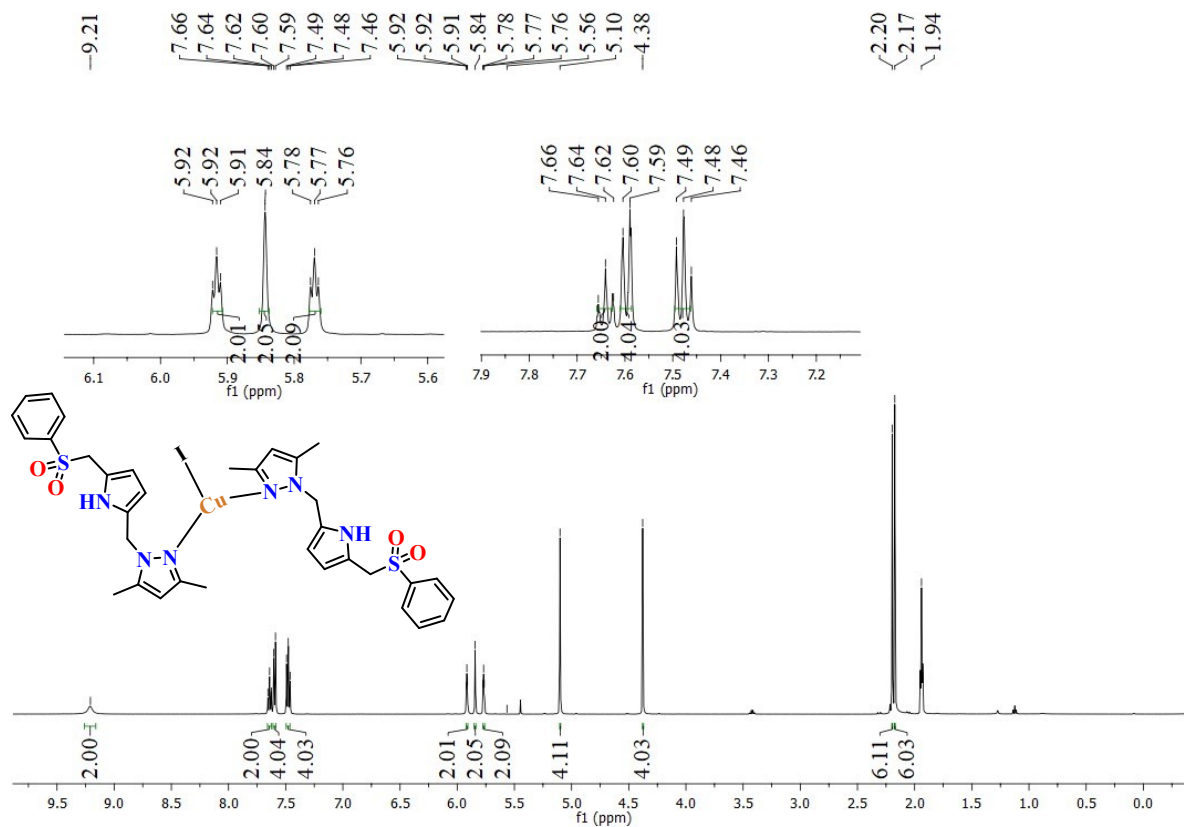

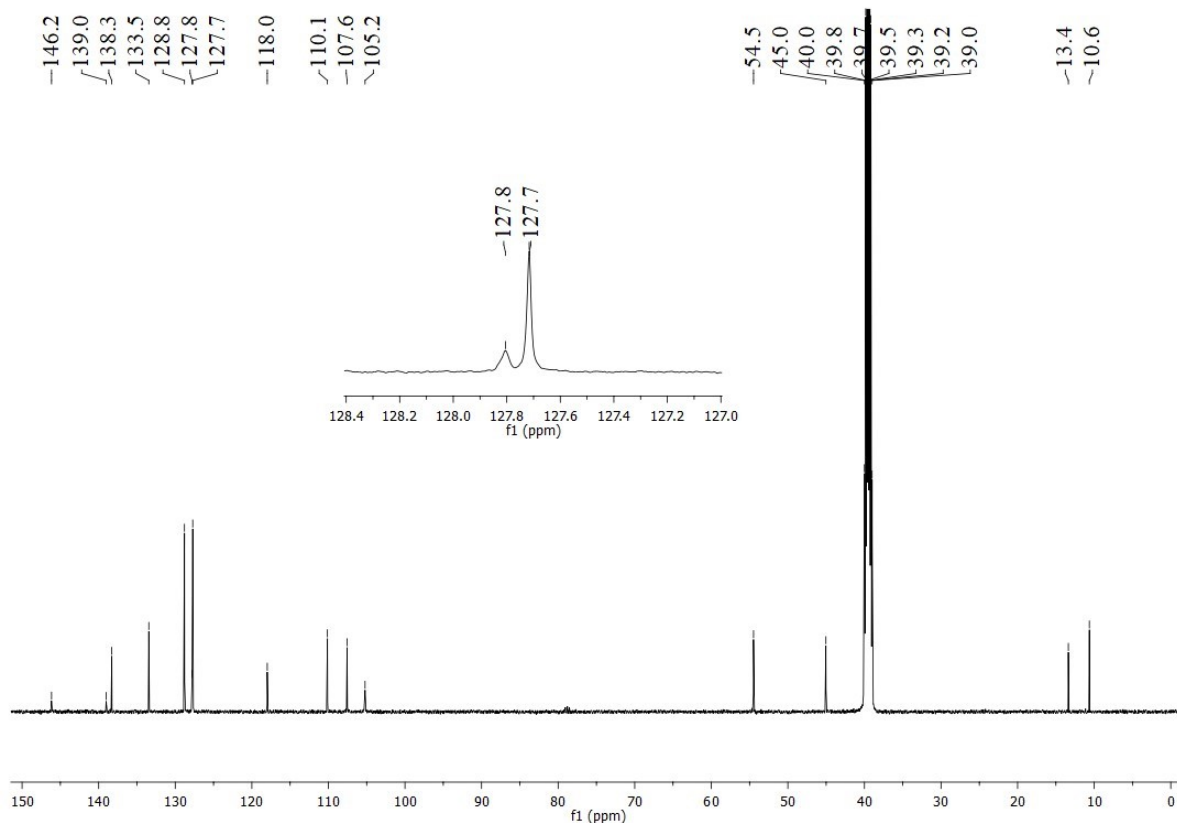

**Figure S43.**  $^{13}\text{C}\{^1\text{H}\}$  NMR (25 °C, 125.7 MHz) spectrum of complex **10** [ $\text{CuI}\{\text{C}_4\text{H}_3\text{N}-2-(\text{CH}_2\text{Me}_2\text{pz})-5-(\text{CH}_2\text{SO}_2\text{Ph})-\kappa^1-\text{N}\}_2$ ] in  $\text{DMSO}-d_6$ .

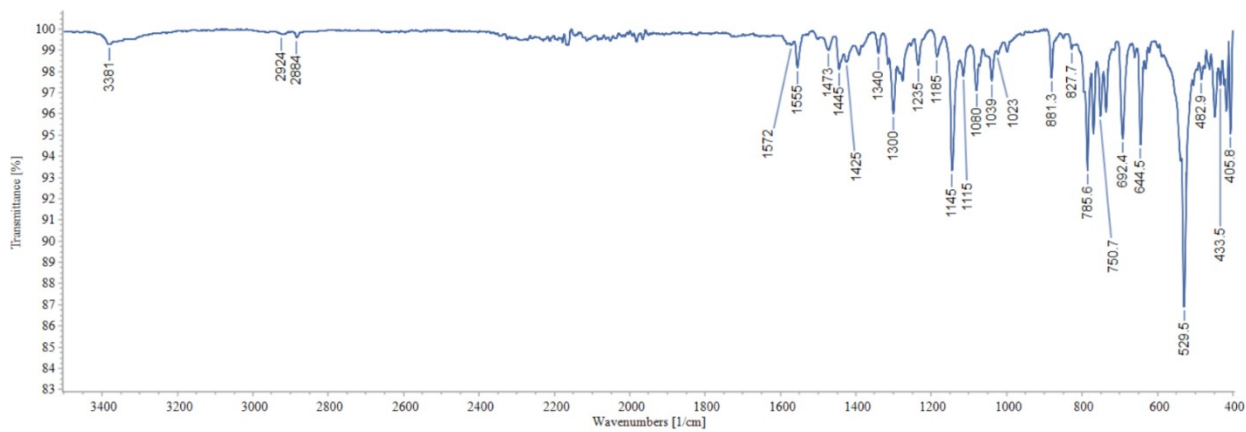

**Figure S44.** The ATR spectrum of complex **10** [ $\text{CuI}\{\text{C}_4\text{H}_3\text{N}-2-(\text{CH}_2\text{Me}_2\text{pz})-5-(\text{CH}_2\text{SO}_2\text{Ph})-\kappa^1-\text{N}\}_2$ ].

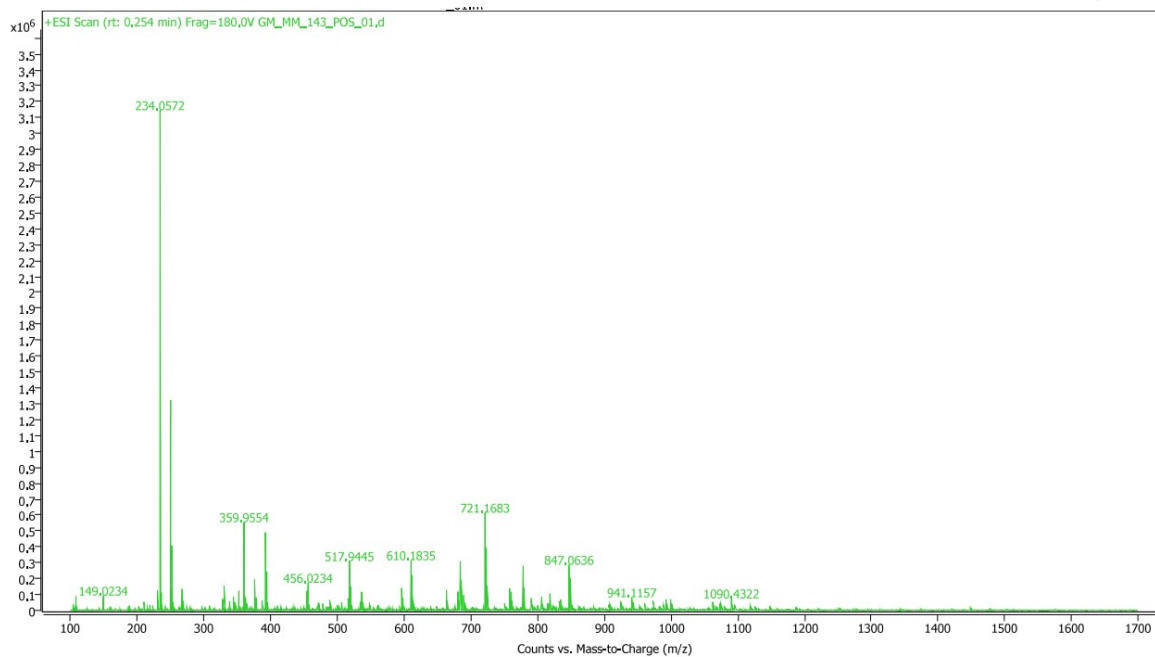

**Figure S45.** HRMS (ESI<sup>+</sup>) spectrum of complex **10** [CuI{C<sub>4</sub>H<sub>3</sub>N-2-(CH<sub>2</sub>Me<sub>2</sub>pz)-5-(CH<sub>2</sub>SO<sub>2</sub>Ph)-κ<sup>1</sup>-N<sub>2</sub>}<sub>2</sub>].

| Species                                                                                                                                                                                                                             | <i>m/z</i> , Found | <i>m/z</i> , Calculated |
|-------------------------------------------------------------------------------------------------------------------------------------------------------------------------------------------------------------------------------------|--------------------|-------------------------|
| [Cu{C <sub>4</sub> H <sub>3</sub> N-2-(CH <sub>2</sub> Me <sub>2</sub> pz)-5-(CH <sub>2</sub> SO <sub>2</sub> Ph)-κ <sup>1</sup> -N <sub>2</sub> } <sub>2</sub> ] <sup>+</sup><br>(Cu(ligand <b>4</b> ) <sub>2</sub> <sup>+</sup> ) | 721.1683           | 721.1692                |

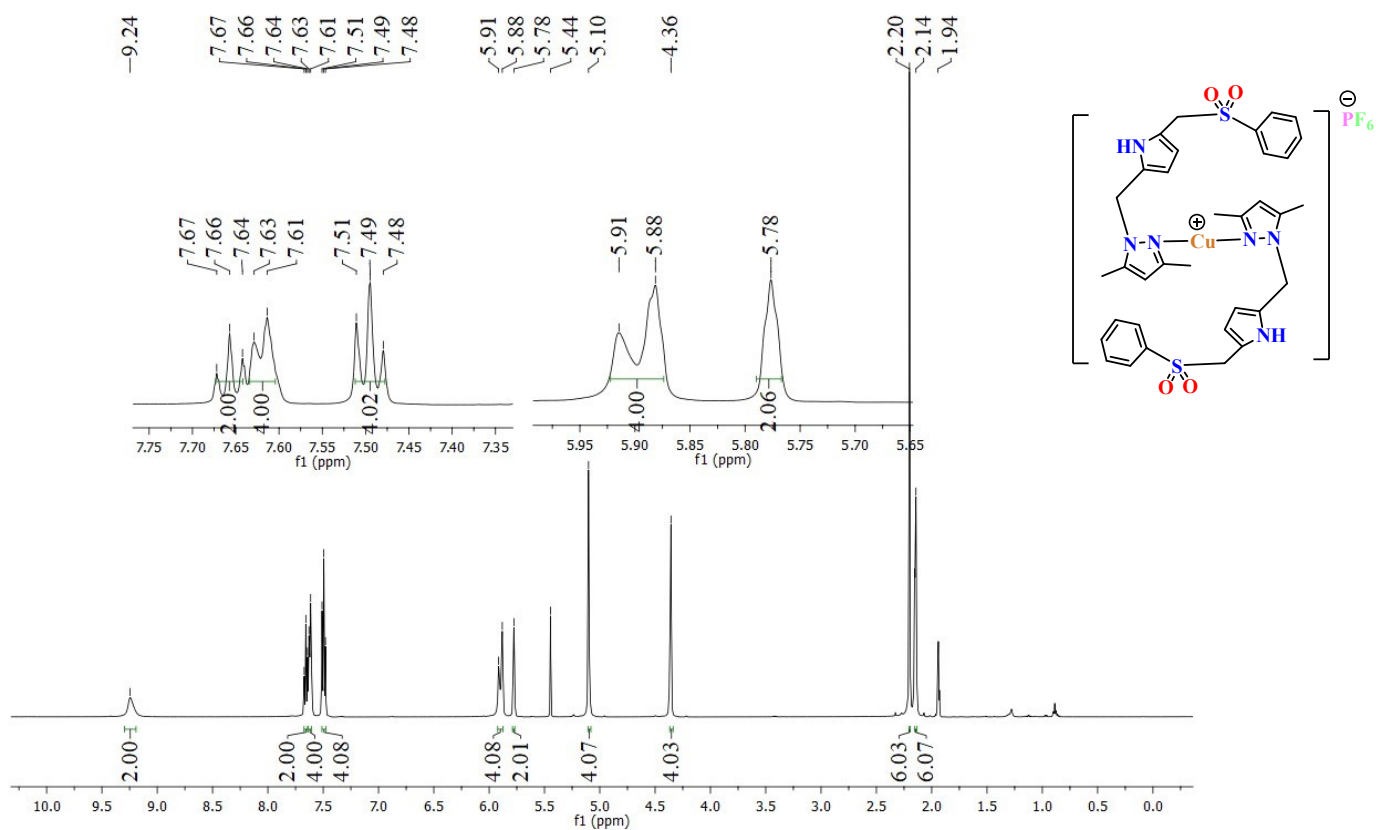

**Figure S46.**  $^1\text{H}$  NMR (25 °C, 500 MHz) spectrum of complex **11a**  $[\text{Cu}\{\text{C}_4\text{H}_3\text{N}-2-(\text{CH}_2\text{Me}_2\text{pz})-5-(\text{CH}_2\text{SO}_2\text{Ph})-\kappa^1\text{-N}\}_2]\text{PF}_6$  in  $\text{CD}_3\text{CN}$ .



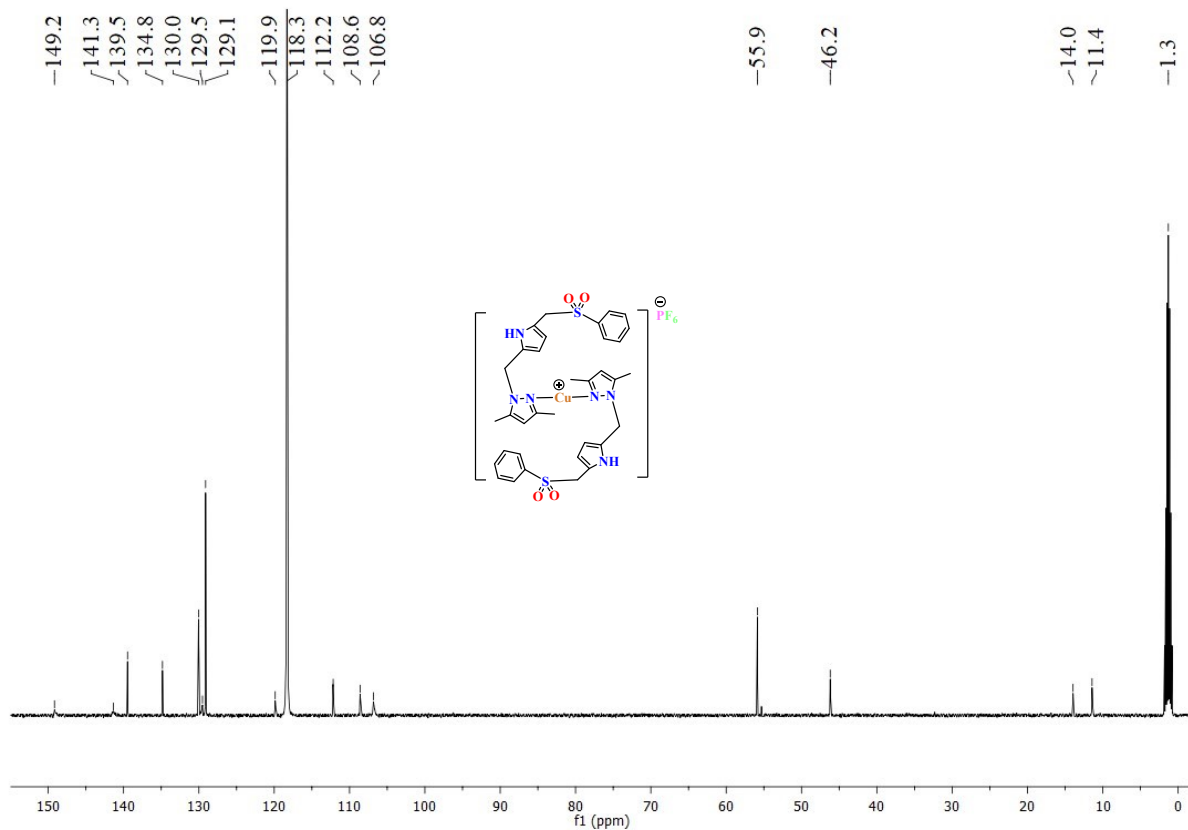

**Figure S47.**  $^{13}\text{C}\{^1\text{H}\}$  NMR (25 °C, 125.7 MHz) spectrum of the complex **11a** [ $\text{Cu}\{\text{C}_4\text{H}_3\text{N}-2-(\text{CH}_2\text{Me}_2\text{pZ})-5-(\text{CH}_2\text{SO}_2\text{Ph})-\kappa^1-\text{N}\}_2\text{PF}_6$ ] in  $\text{CD}_3\text{CN}$ .

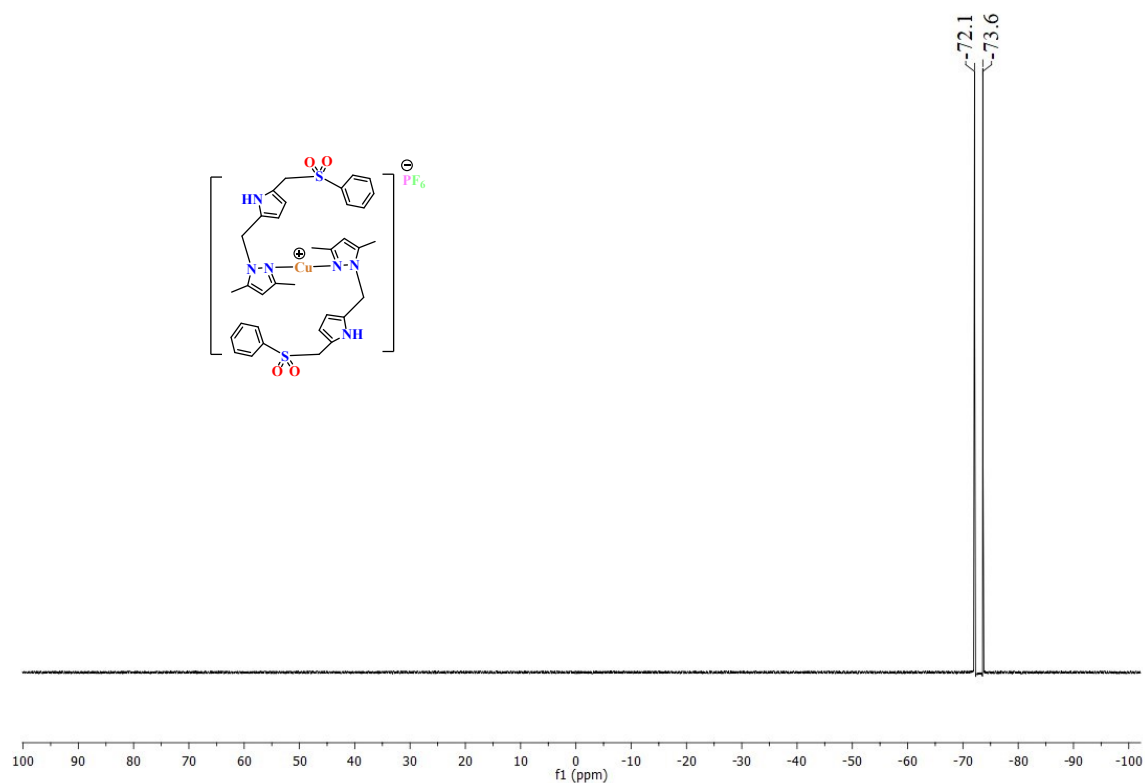

**Figure S48.**  $^{19}\text{F}$  NMR (25 °C, 470.59 MHz) spectrum of complex **11a** [ $\text{Cu}\{\text{C}_4\text{H}_3\text{N}-2-(\text{CH}_2\text{Me}_2\text{pZ})-5-(\text{CH}_2\text{SO}_2\text{Ph})-\kappa^1-\text{N}\}_2\text{PF}_6$ ] in  $\text{CD}_3\text{CN}$ .

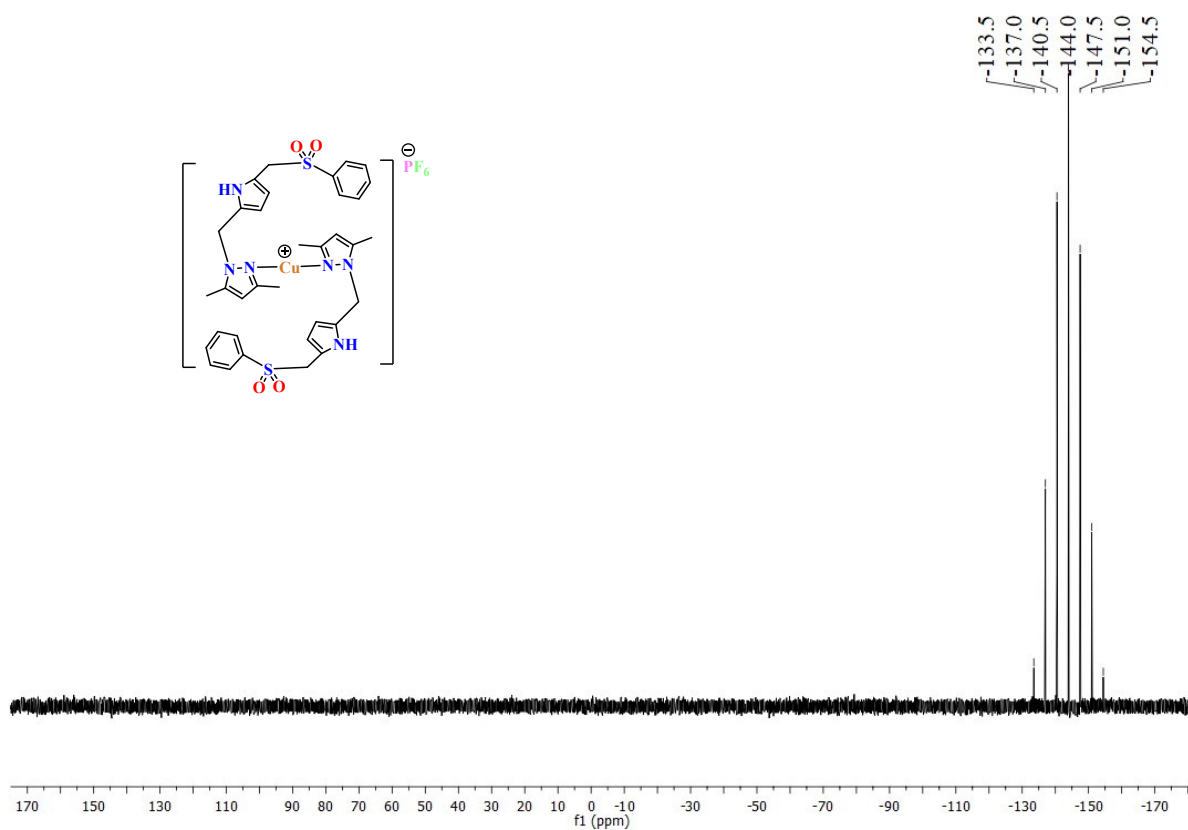

**Figure S49.**  $^{31}\text{P}\{^1\text{H}\}$  NMR (25 °C, 202.46 MHz) spectrum of complex **11a**  $[\text{Cu}\{\text{C}_4\text{H}_3\text{N}-2-(\text{CH}_2\text{Me}_2\text{pz})-5-(\text{CH}_2\text{SO}_2\text{Ph})-\kappa^1\text{-N}\}_2]\text{PF}_6$  in  $\text{CD}_3\text{CN}$ .

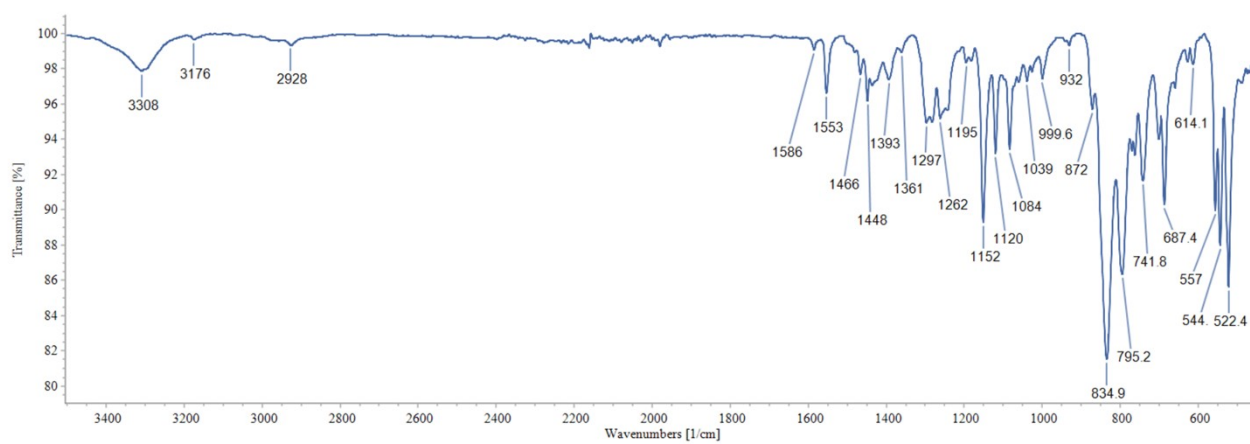

**Figure S50.** The ATR spectrum of complex **11a**  $[\text{Cu}\{\text{C}_4\text{H}_3\text{N}-2-(\text{CH}_2\text{Me}_2\text{pz})-5-(\text{CH}_2\text{SO}_2\text{Ph})-\kappa^1\text{-N}\}_2]\text{PF}_6$ .

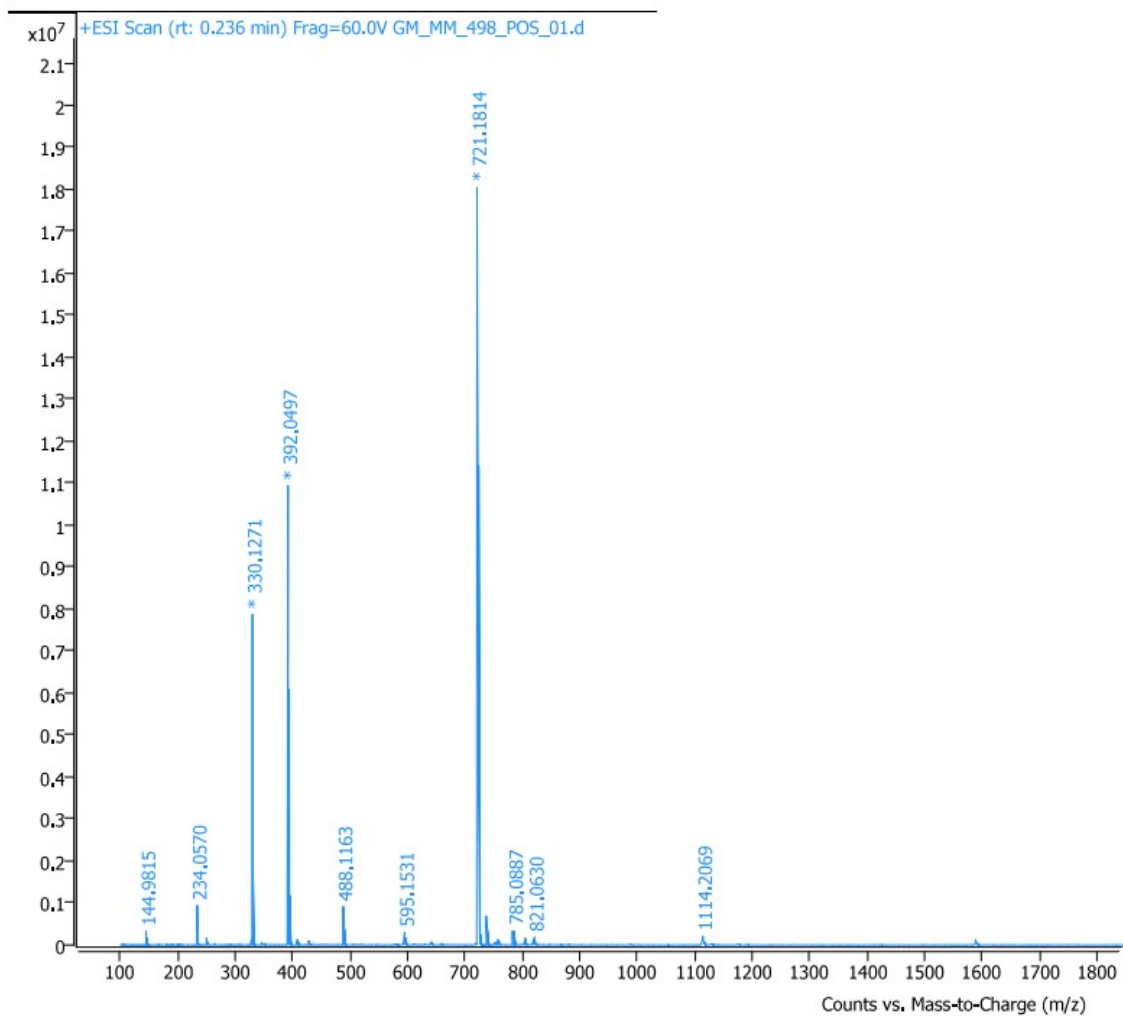

**Figure S51.** HRMS (ESI<sup>+</sup>) spectrum of complex **11a** [Cu{C<sub>4</sub>H<sub>3</sub>N-2-(CH<sub>2</sub>Me<sub>2</sub>pz)-5-(CH<sub>2</sub>SO<sub>2</sub>Ph)-κ<sup>1</sup>-N<sub>2</sub>}]<sub>2</sub>PF<sub>6</sub>.

| Species                                                                                                                                                                                                                                                                      | <i>m/z</i> , Found | <i>m/z</i> , Calculated |
|------------------------------------------------------------------------------------------------------------------------------------------------------------------------------------------------------------------------------------------------------------------------------|--------------------|-------------------------|
| [Cu{C <sub>4</sub> H <sub>3</sub> N-2-(CH <sub>2</sub> Me <sub>2</sub> pz)-5-(CH <sub>2</sub> SO <sub>2</sub> Ph)-κ <sup>1</sup> -N <sub>2</sub> }] <sub>2</sub> <sup>+</sup><br>(Cu(ligand <b>4</b> ) <sub>2</sub> ) <sup>+</sup>                                           | 721.1814           | 721.1692                |
| [Cu{C <sub>4</sub> H <sub>3</sub> N-2-(CH <sub>2</sub> Me <sub>2</sub> pz)-5-(CH <sub>2</sub> SO <sub>2</sub> Ph)-κ <sup>1</sup> -N <sub>2</sub> }] <sup>+</sup><br>(Cu(ligand <b>4</b> ) <sup>+</sup> )                                                                     | 392.0497           | 392.0494                |
| [Cu(CH <sub>3</sub> OH) <sub>3</sub> {C <sub>4</sub> H <sub>3</sub> N-2-(CH <sub>2</sub> Me <sub>2</sub> pz)-5-(CH <sub>2</sub> SO <sub>2</sub> Ph)-κ <sup>1</sup> -N <sub>2</sub> }] <sup>+</sup><br>(Cu(CH <sub>3</sub> OH) <sub>3</sub> (ligand <b>4</b> ) <sup>+</sup> ) | 488.1163           | 488.1280                |

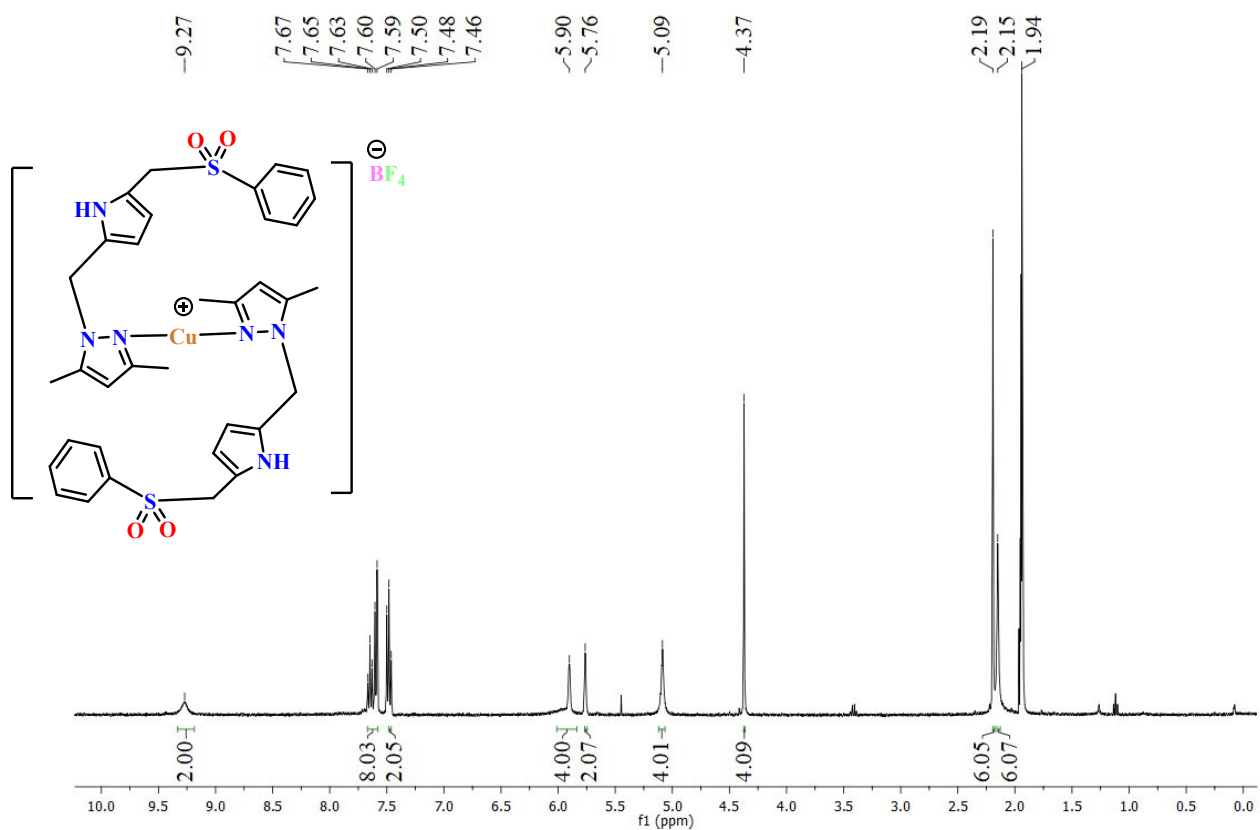

**Figure S52.**  $^1\text{H}$  NMR (25 °C, 400 MHz) spectrum of complex **11b** in  $\text{CD}_3\text{CN}$ .

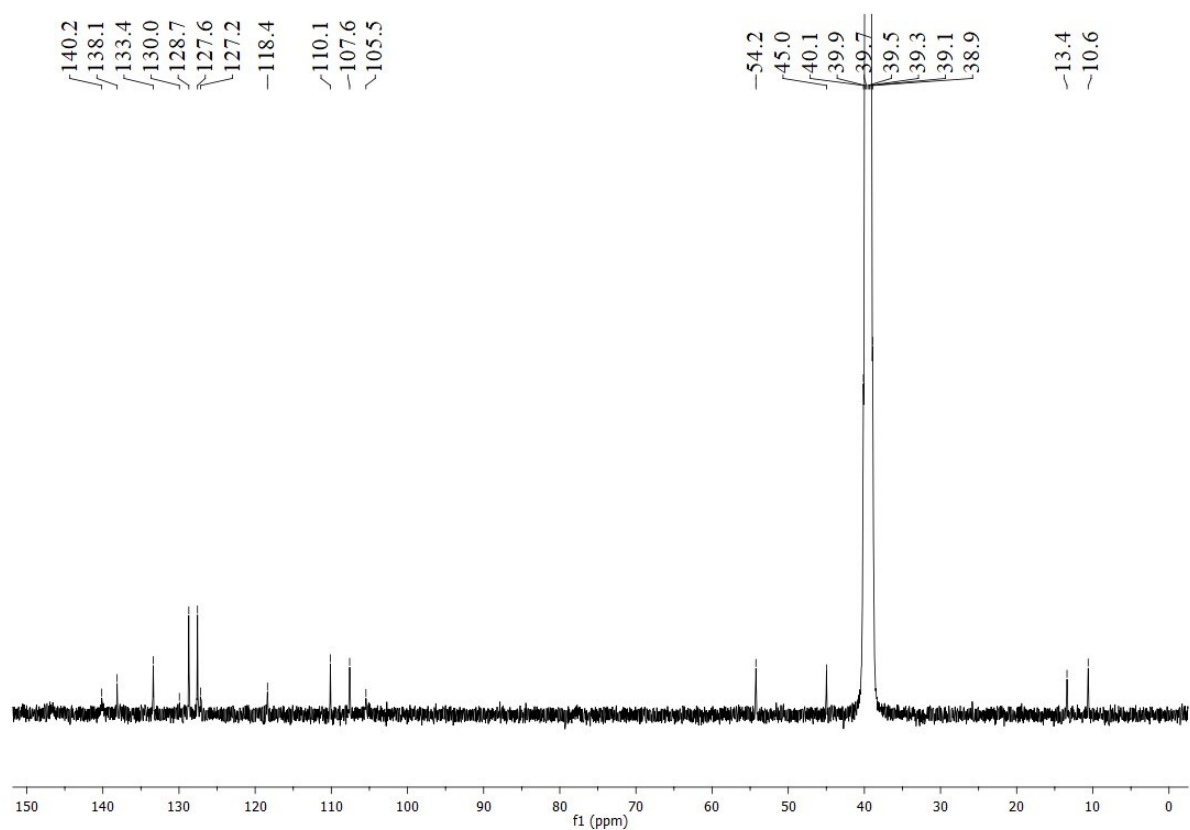

**Figure S53.**  $^{13}\text{C}\{^1\text{H}\}$  NMR (25 °C, 100.6 MHz) spectrum of the complex **11b** [ $\text{Cu}\{\text{C}_4\text{H}_3\text{N}-2-(\text{CH}_2\text{Me}_2\text{pz})-5-(\text{CH}_2\text{SO}_2\text{Ph})-\kappa^1\text{-N}\}_2\text{BF}_4$ ] in  $\text{DMSO}-d_6$ .

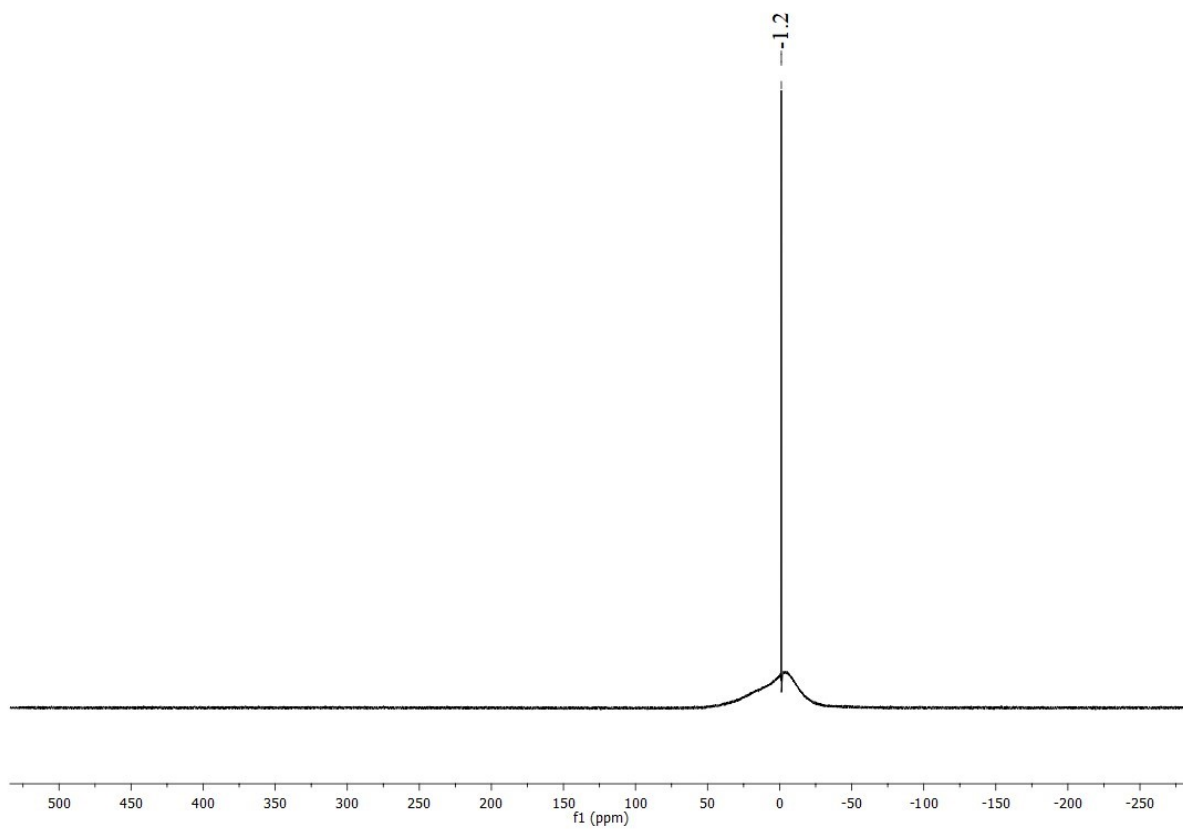

**Figure S54.**  $^{11}\text{B}$  NMR (25 °C, 160.46 MHz) spectrum of complex **11b**  $[\text{Cu}\{\text{C}_4\text{H}_3\text{N}-2-(\text{CH}_2\text{Me}_2\text{pZ})-5-(\text{CH}_2\text{SO}_2\text{Ph})-\kappa^1\text{-N}\}_2]\text{BF}_4$  in  $\text{CD}_3\text{CN}$ .

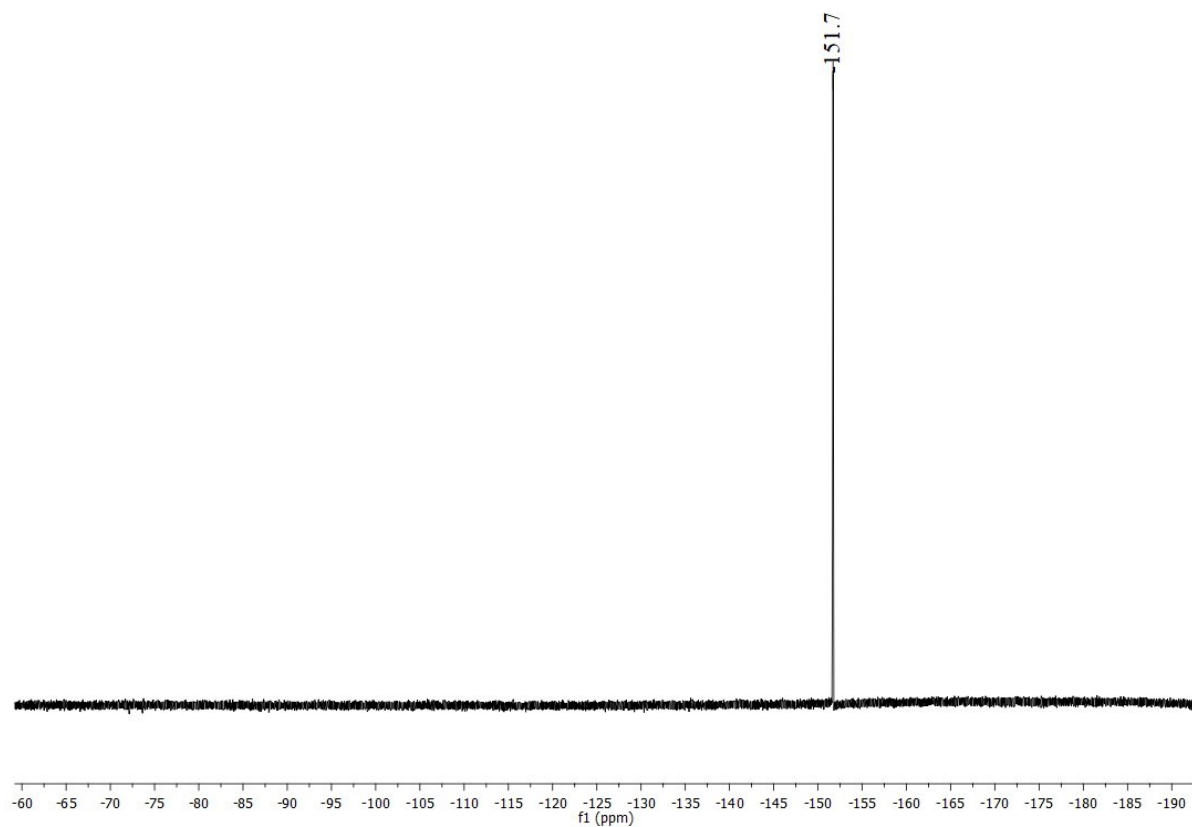

**Figure S55.**  $^{19}\text{F}$  NMR (25 °C, 470.59 MHz) spectrum of complex **11b** [ $\text{Cu}\{\text{C}_4\text{H}_3\text{N}-2-(\text{CH}_2\text{Me}_2\text{pz})-5-(\text{CH}_2\text{SO}_2\text{Ph})-\kappa^1-\text{N}\}_2\text{]BF}_4$  in  $\text{CD}_3\text{CN}$ .

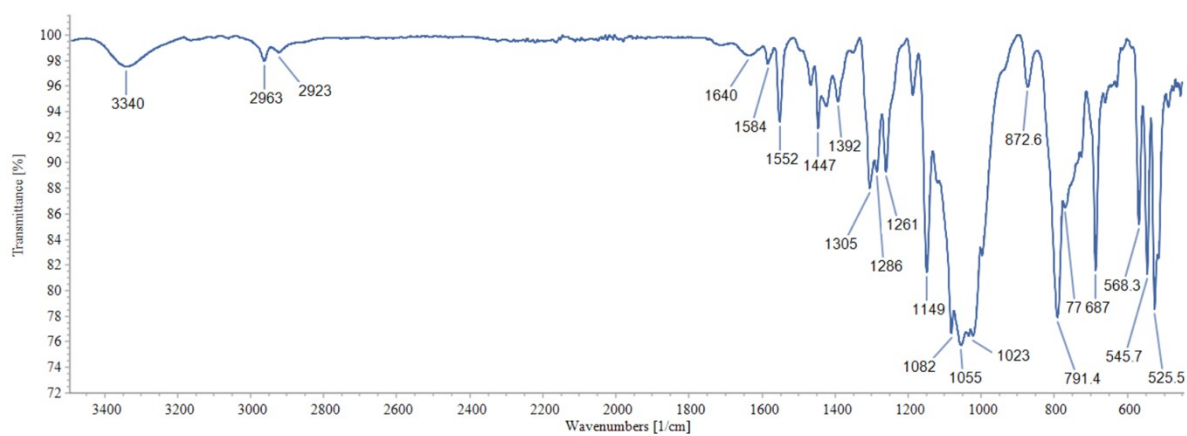

**Figure S56.** The ATR spectrum of complex **11b**.

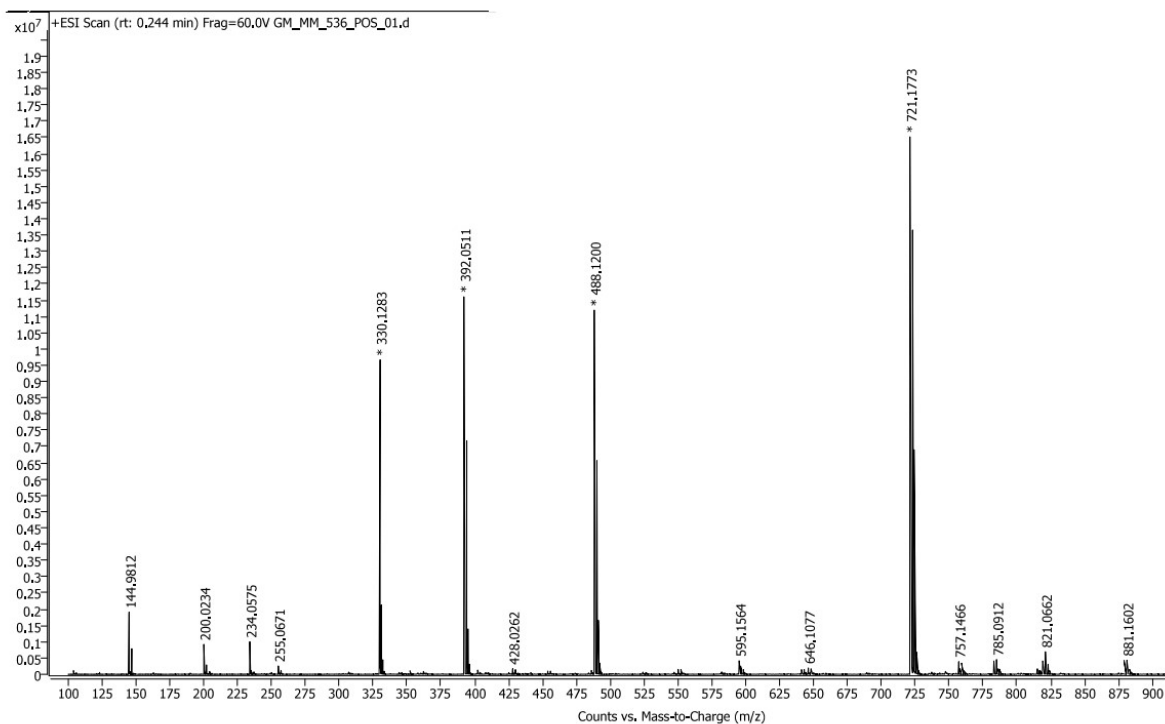

## Target Screening Report

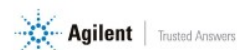

Compound Spectra (overlaid)

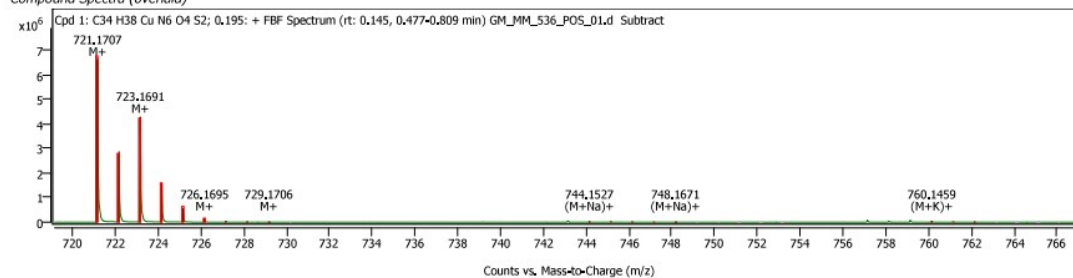

Compound ID Table

| Name | Formula                                                                        | Species                 | RT    | RT Diff | Mass     | CAS | ID Source | Score | Score (Lib) | Score (Tgt) |
|------|--------------------------------------------------------------------------------|-------------------------|-------|---------|----------|-----|-----------|-------|-------------|-------------|
|      | C <sub>34</sub> H <sub>38</sub> CuN <sub>6</sub> O <sub>4</sub> S <sub>2</sub> | M+<br>(M+Na)+<br>(M+K)+ | 0.195 |         | 721.1708 |     | FBF       | 95.69 |             | 95.69       |

**Figure S57.** HRMS (ESI+) spectrum of complex **11b**.

| Species                                                                                                                                                                                                                                                                      | <i>m/z</i> , Found | <i>m/z</i> , Calculated |
|------------------------------------------------------------------------------------------------------------------------------------------------------------------------------------------------------------------------------------------------------------------------------|--------------------|-------------------------|
| [Cu{C <sub>4</sub> H <sub>3</sub> N-2-(CH <sub>2</sub> Me <sub>2</sub> pz)-5-(CH <sub>2</sub> SO <sub>2</sub> Ph)-κ <sup>1</sup> -N <sub>2</sub> } <sub>2</sub> ] <sup>+</sup><br>(Cu(ligand <b>4</b> ) <sub>2</sub> ) <sup>+</sup>                                          | 721.1773           | 721.1692                |
| [Cu{C <sub>4</sub> H <sub>3</sub> N-2-(CH <sub>2</sub> Me <sub>2</sub> pz)-5-(CH <sub>2</sub> SO <sub>2</sub> Ph)-κ <sup>1</sup> -N <sub>1</sub> }] <sup>+</sup><br>(Cu(ligand <b>4</b> ) <sup>+</sup> )                                                                     | 392.0511           | 392.0494                |
| [Cu(CH <sub>3</sub> OH) <sub>3</sub> {C <sub>4</sub> H <sub>3</sub> N-2-(CH <sub>2</sub> Me <sub>2</sub> pz)-5-(CH <sub>2</sub> SO <sub>2</sub> Ph)-κ <sup>1</sup> -N <sub>1</sub> }] <sup>+</sup><br>(Cu(CH <sub>3</sub> OH) <sub>3</sub> (ligand <b>4</b> ) <sup>+</sup> ) | 488.1200           | 488.1280                |

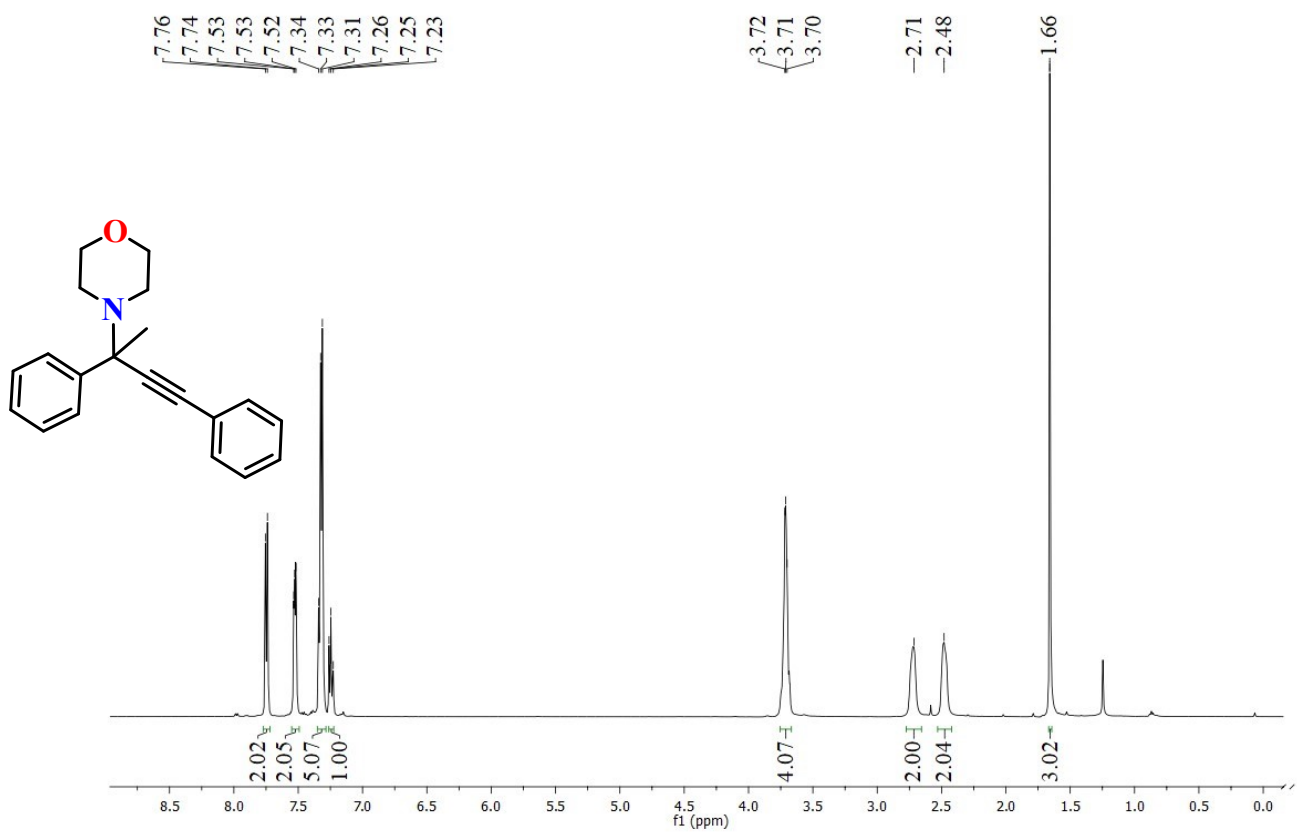

**Figure S58.**  $^1\text{H NMR}$  (25 °C, 500 MHz) spectrum of tetrasubstituted propargylamine **12a** in  $\text{CDCl}_3$ .



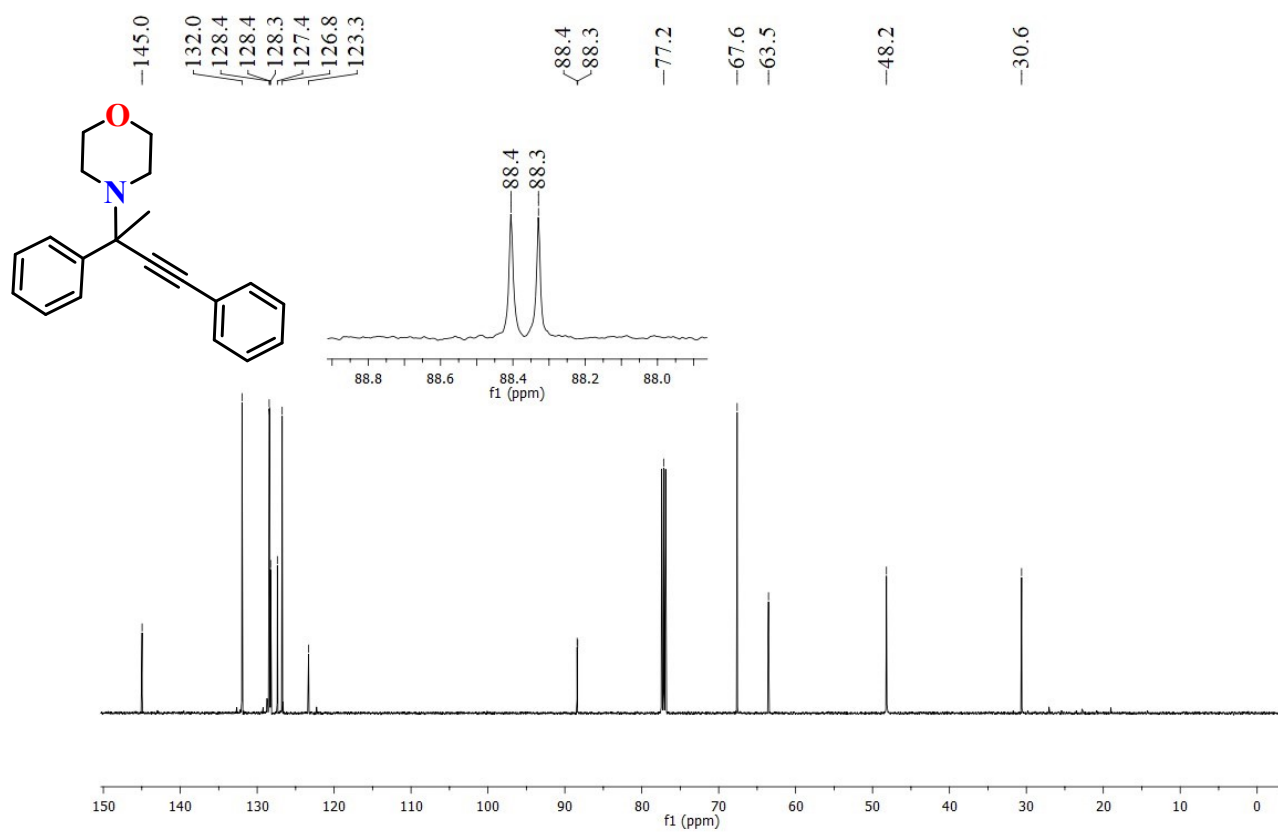

**Figure S59.**  $^{13}\text{C}\{^1\text{H}\}$  NMR (25 °C, 125.7 MHz) spectrum of tetrasubstituted propargylamine **12a** in  $\text{CDCl}_3$ .

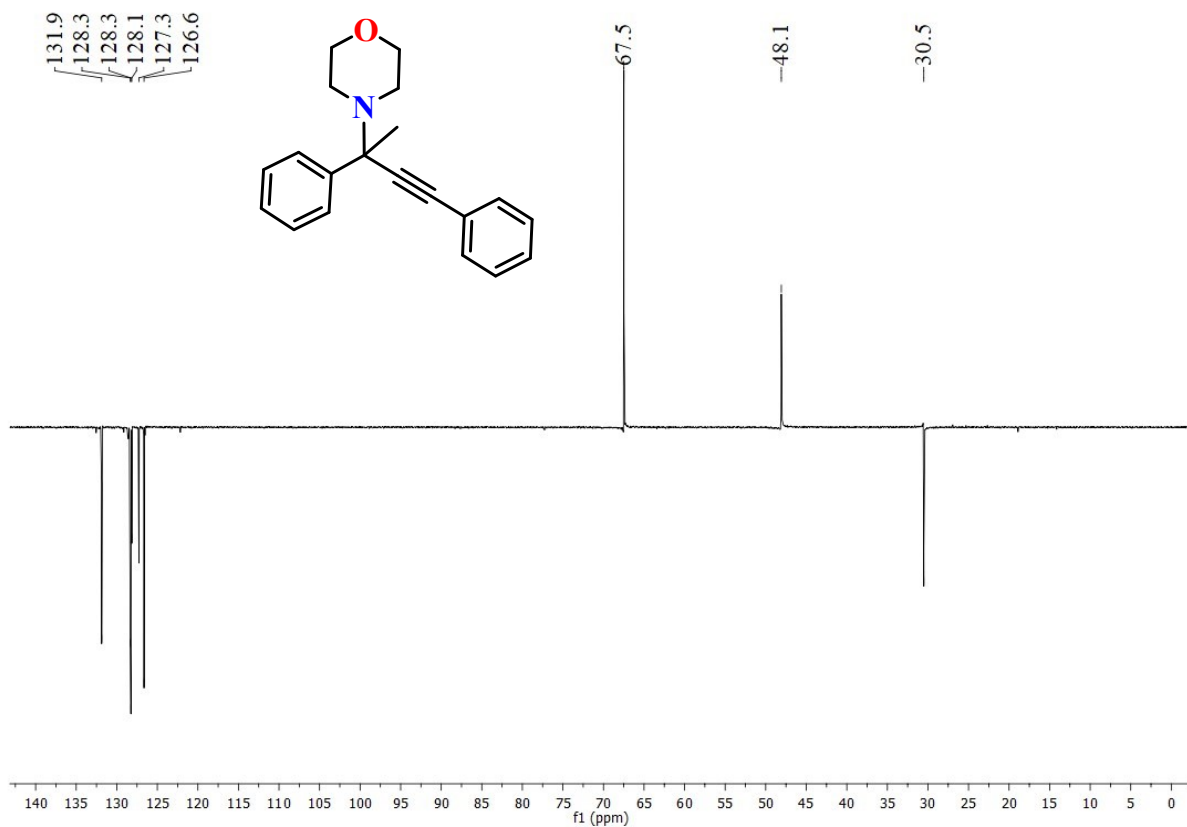

**Figure S60.**  $^{13}\text{C}\{^1\text{H}\}$ DEPT NMR (25 °C, 125.7 MHz) spectrum of tetrasubstituted propargylamine **12a** in  $\text{CDCl}_3$ .

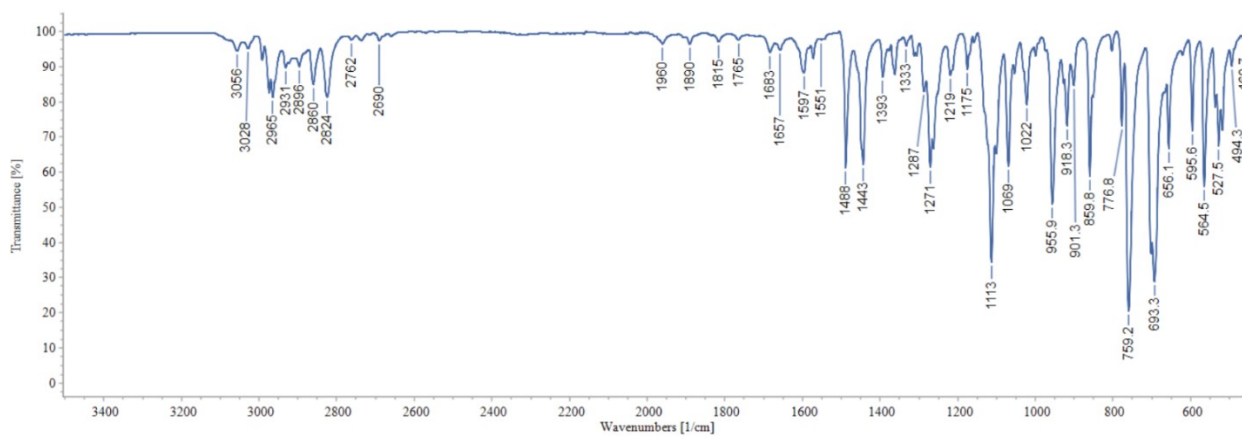

**Figure S61.** The ATR spectrum of tetra-substituted propargylamine **12a**.

## Spectrum Plot Report

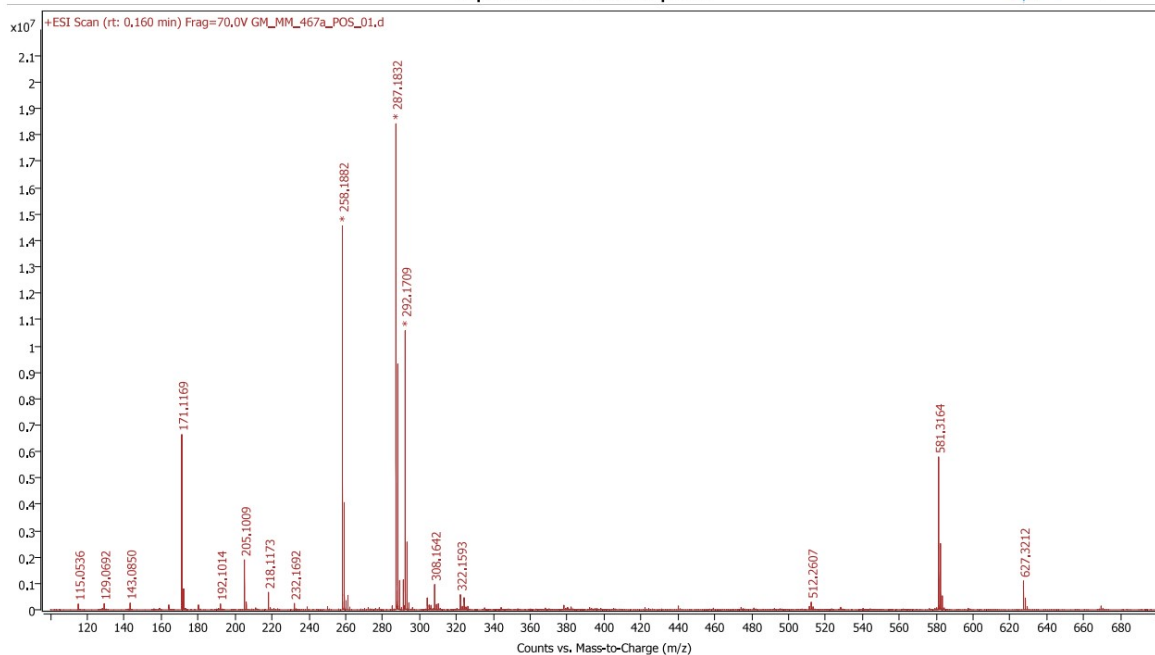

**Figure S62.** HRMS (ESI+) spectrum of tetrasubstituted propargylamine **12a**. [M+H]<sup>+</sup>: Calc. 292.1696, found: 292.1709.

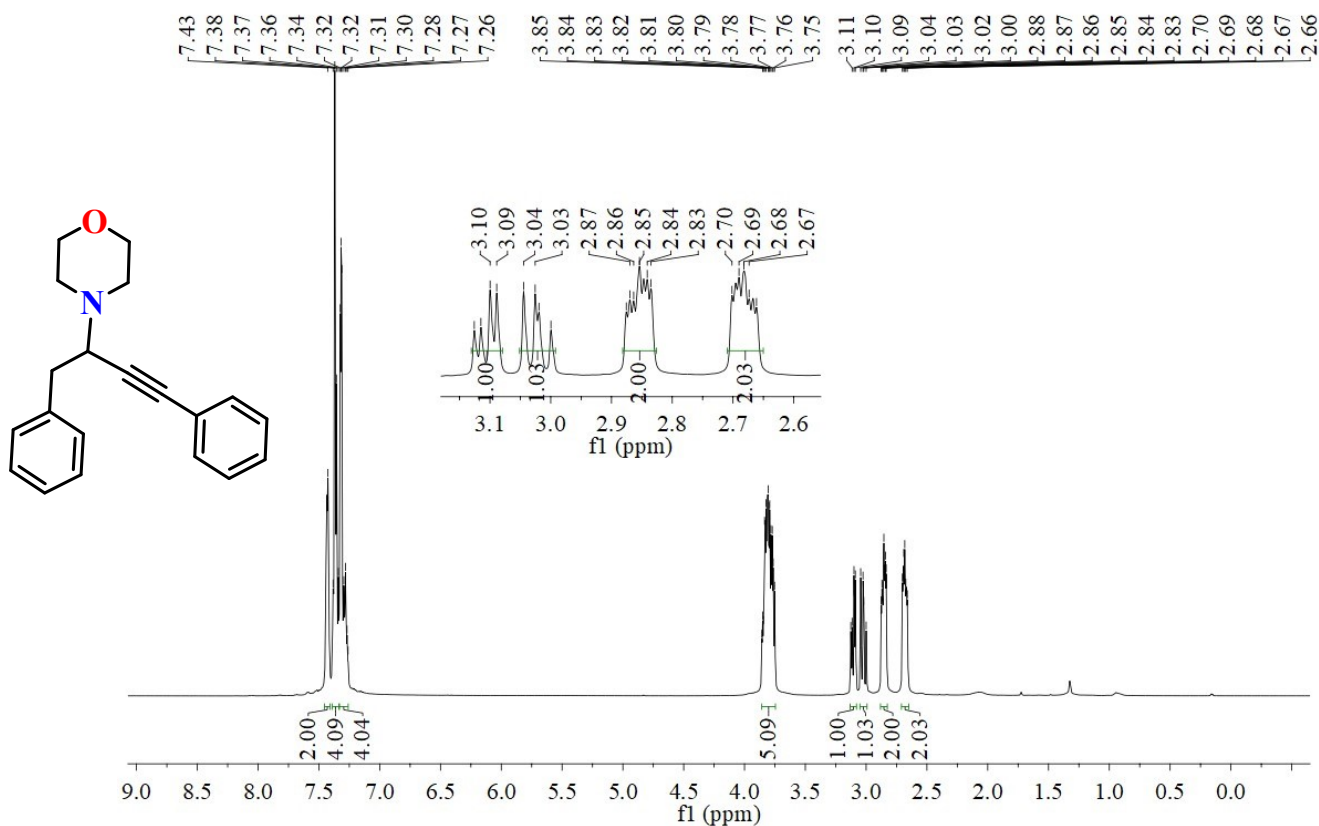

**Figure S63.** <sup>1</sup>H NMR (25 °C, 500 MHz) spectrum of trisubstituted propargylamine **12b** in CDCl<sub>3</sub>.

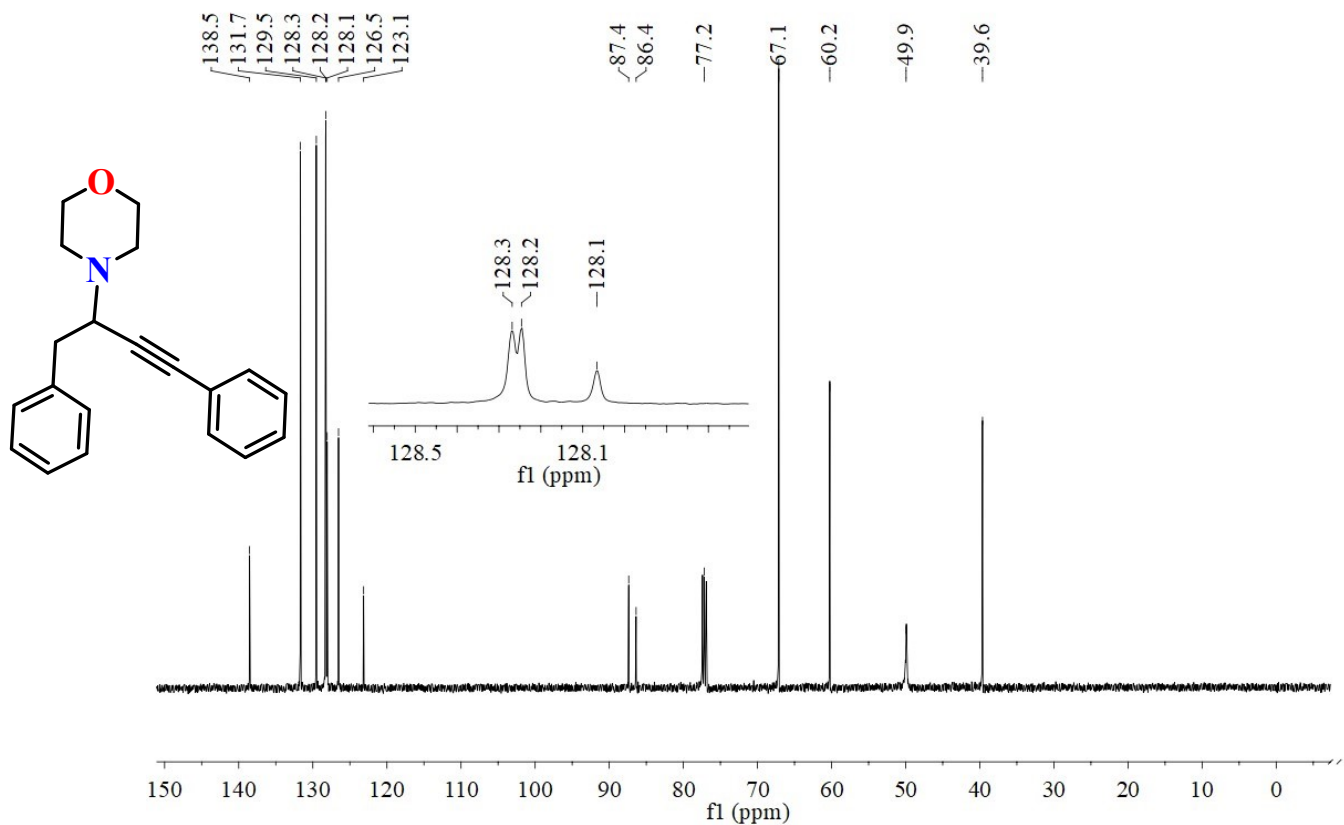

**Figure S64.**  $^{13}\text{C}\{^1\text{H}\}$  NMR (25 °C, 125.7 MHz) spectrum of trisubstituted propargylamine **12b** in  $\text{CDCl}_3$ .

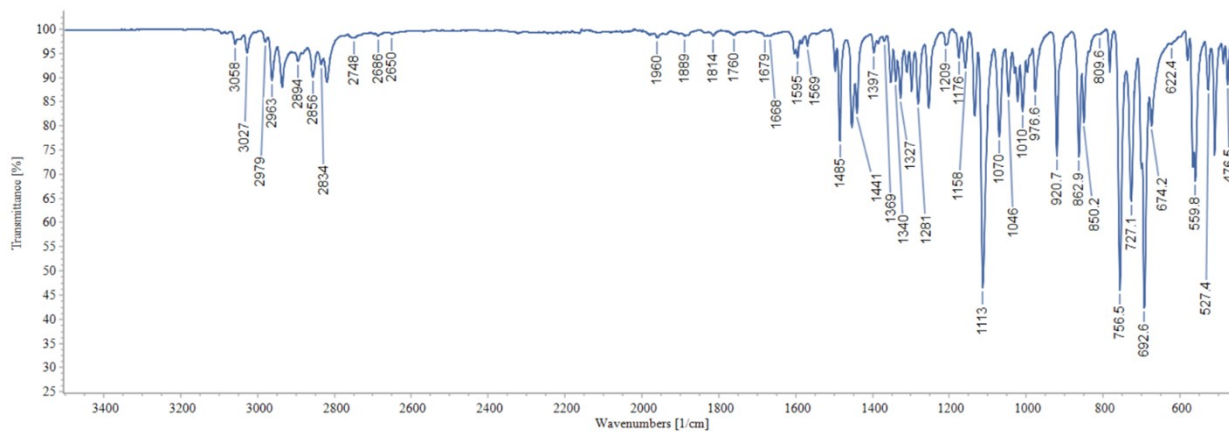

**Figure S65.** The ATR spectrum of trisubstituted propargylamine **12b**.

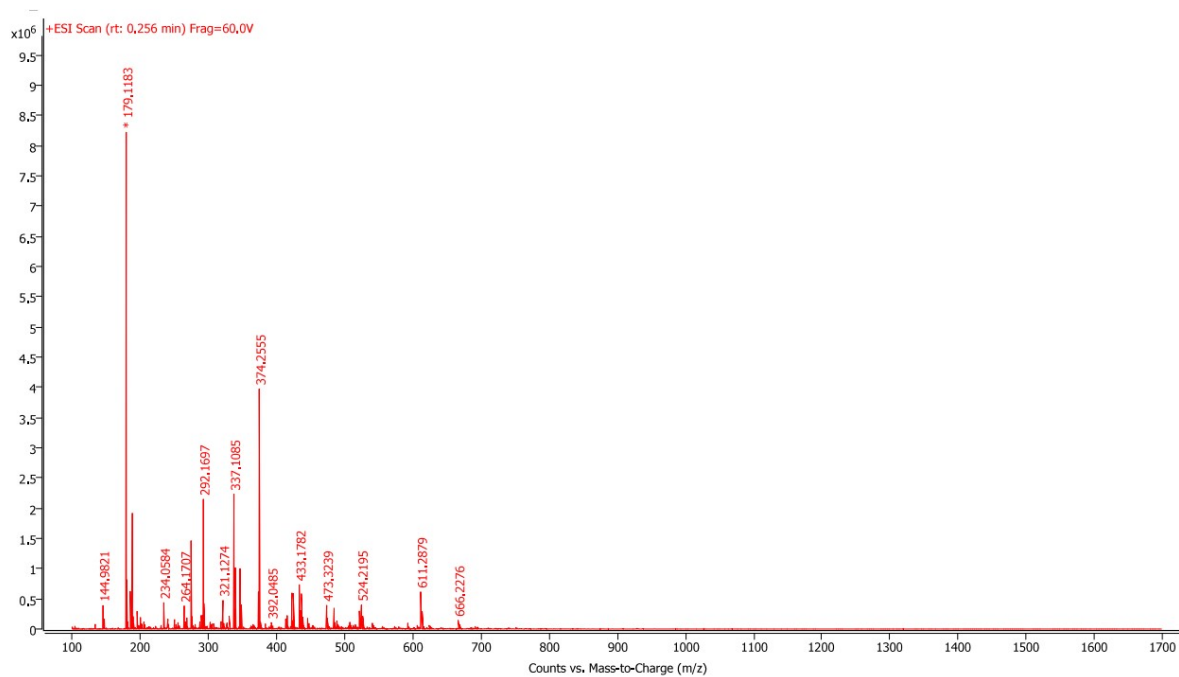

**Figure S66.** HRMS (ESI+) spectrum of trisubstituted propargylamine **12b**.  $[M+H]^+$ : Calc. 292.1696, found: 292.1697.

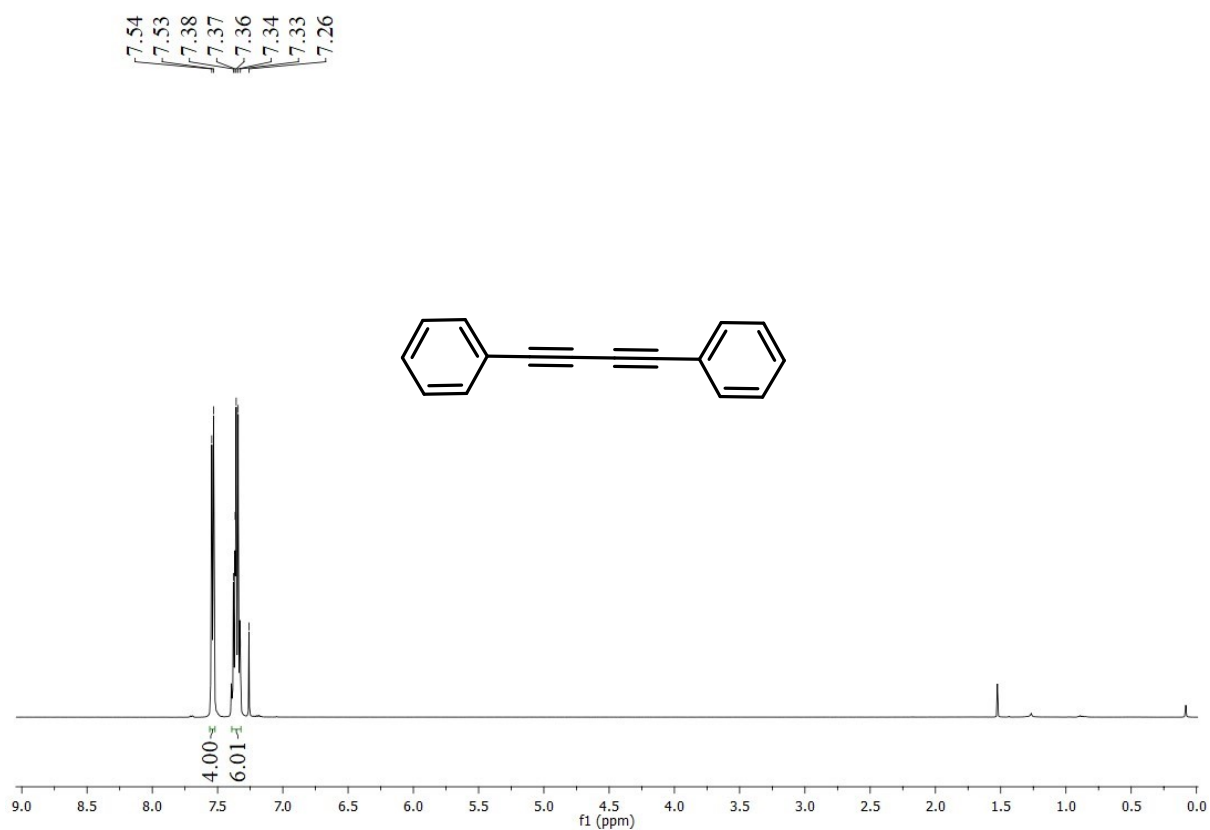

**Figure S67.**  $^1\text{H}$  NMR (25 °C, 500 MHz) spectrum of phenylacetylene dimer **12c** in  $\text{CDCl}_3$ .

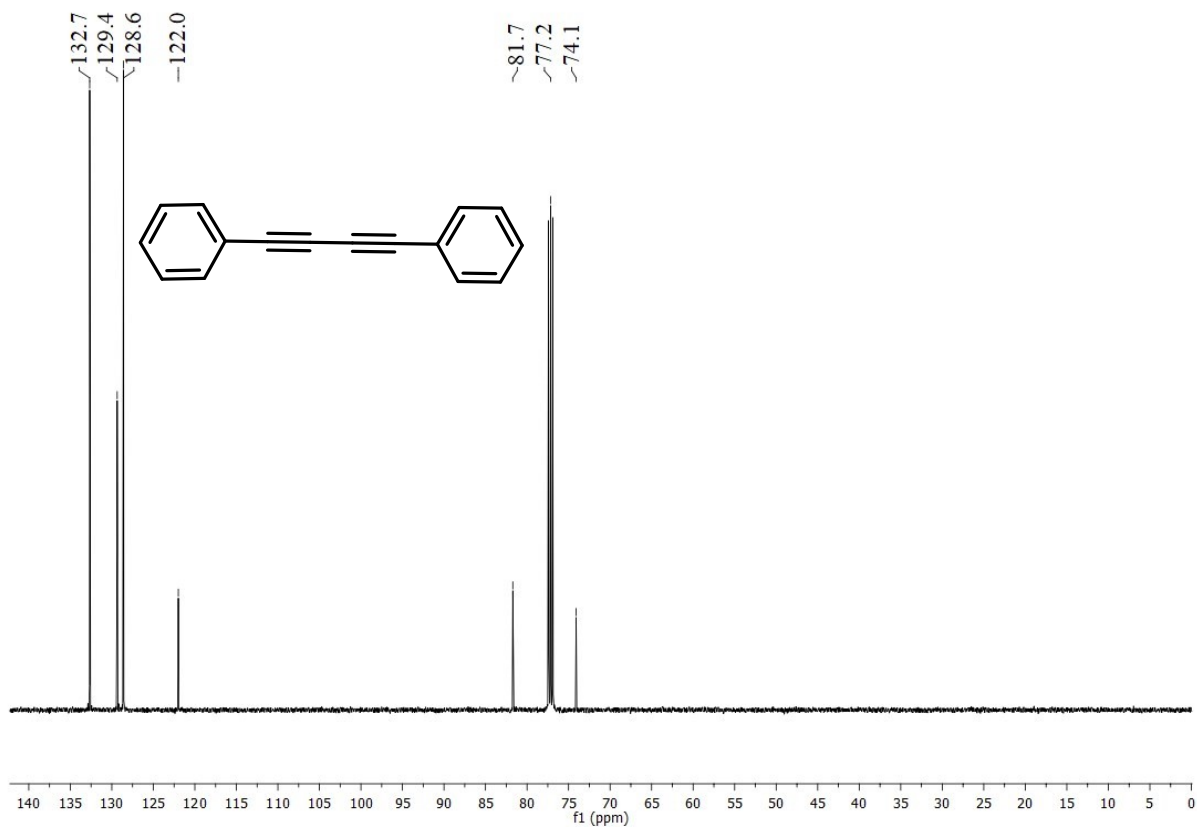

**Figure S68.**  $^{13}\text{C}\{^1\text{H}\}$  NMR (25 °C, 125.7 MHz) spectrum of phenylacetylene dimer **12c** in  $\text{CDCl}_3$ .

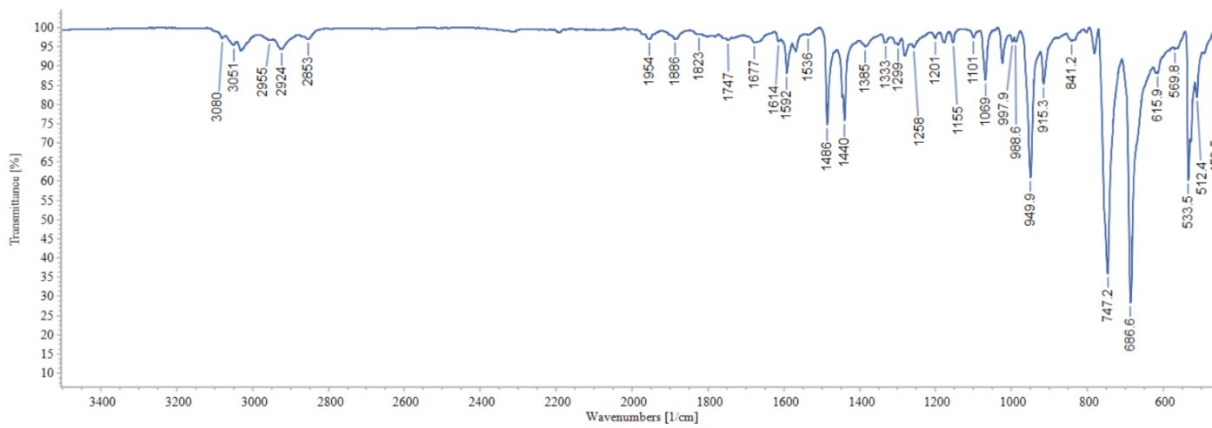

**Figure S69.** The ATR spectrum of phenylacetylene dimer **12c**.

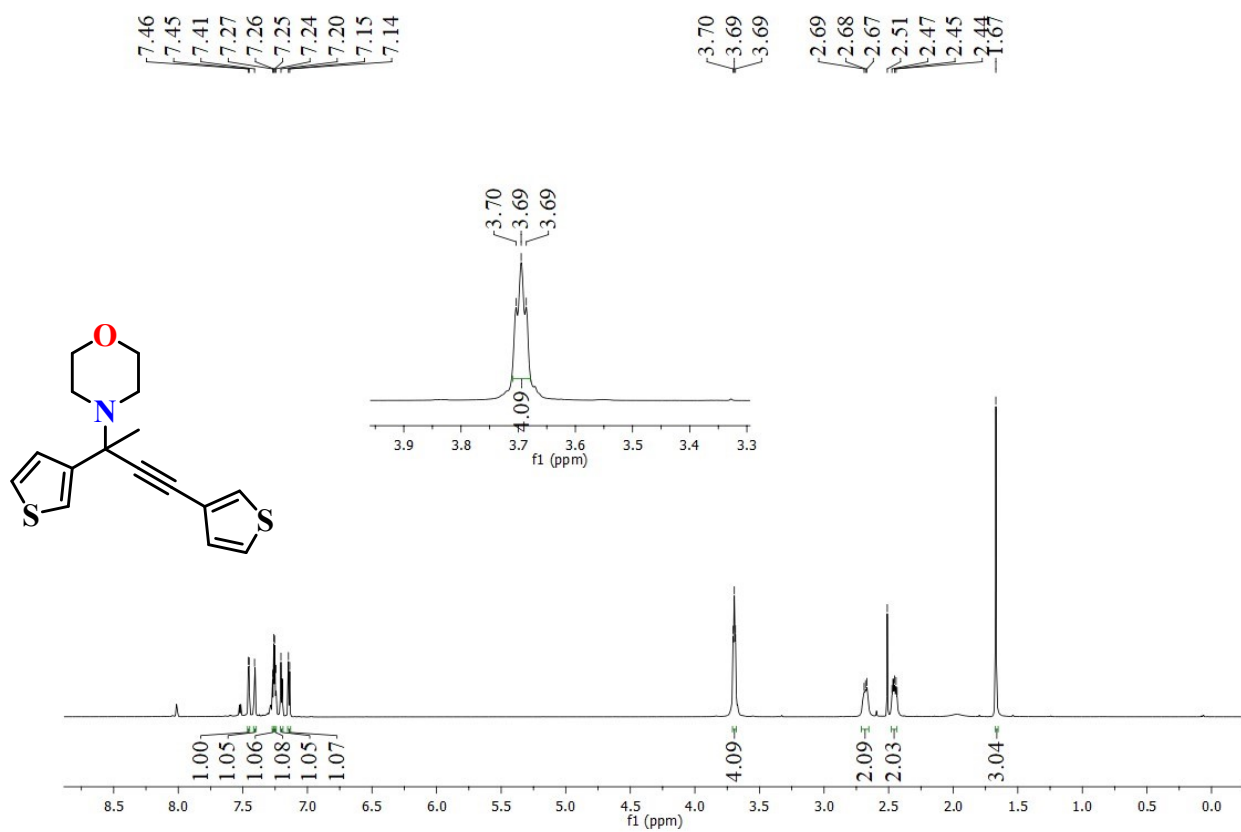

**Figure S70.** <sup>1</sup>H NMR (25 °C, 500 MHz) spectrum of the tetrasubstituted product **13a** from 3-ethynylthiophene in CDCl<sub>3</sub>.

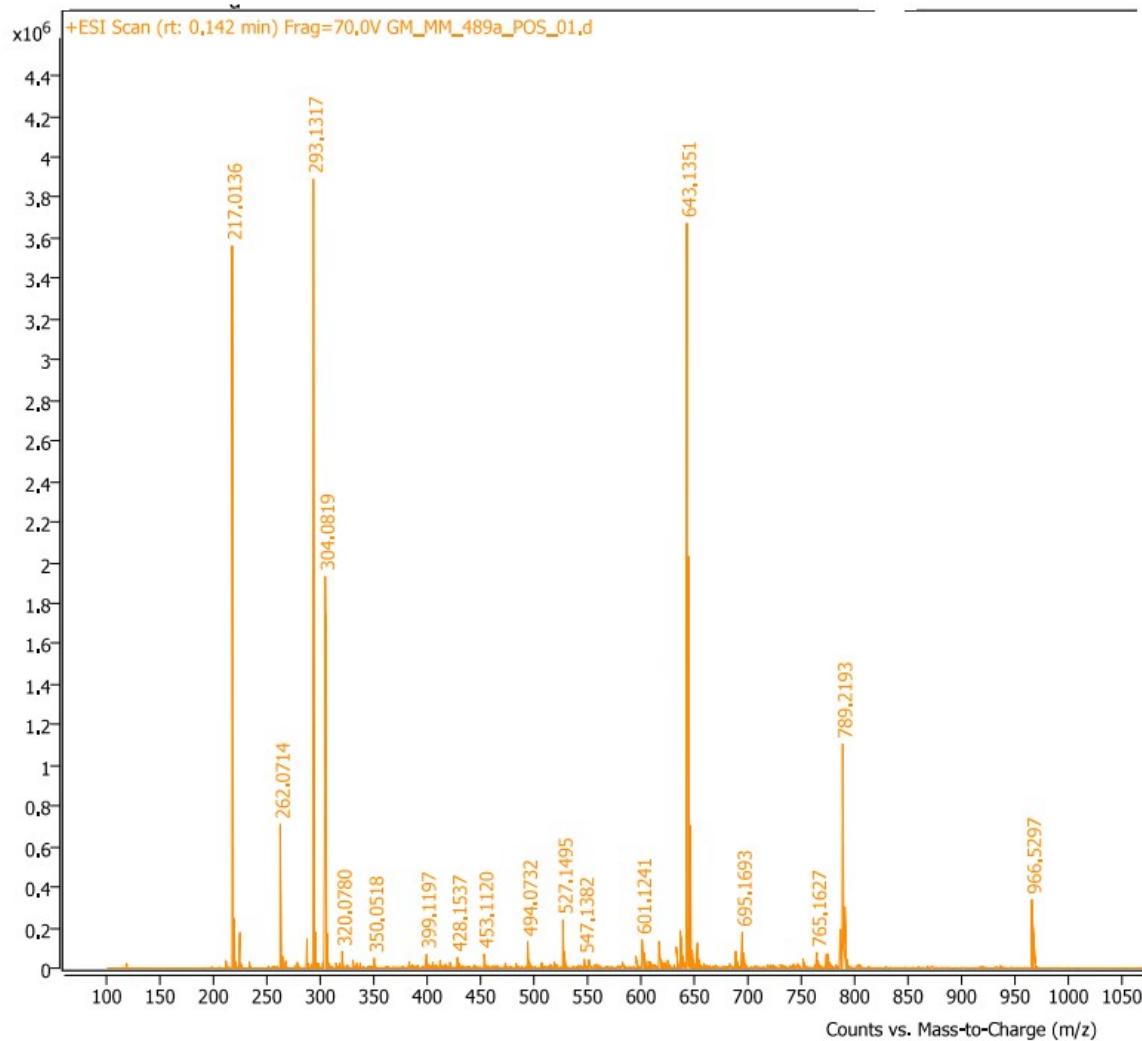

**Figure S71.** HRMS (+ESI) spectrum of the tetrasubstituted product from 3-ethynylthiophene **13a**. calcd  $m/z$  for  $[M+H]^+$   $C_{16}H_{18}NOS_2^+$ : 304.0825, found: 304.0819.



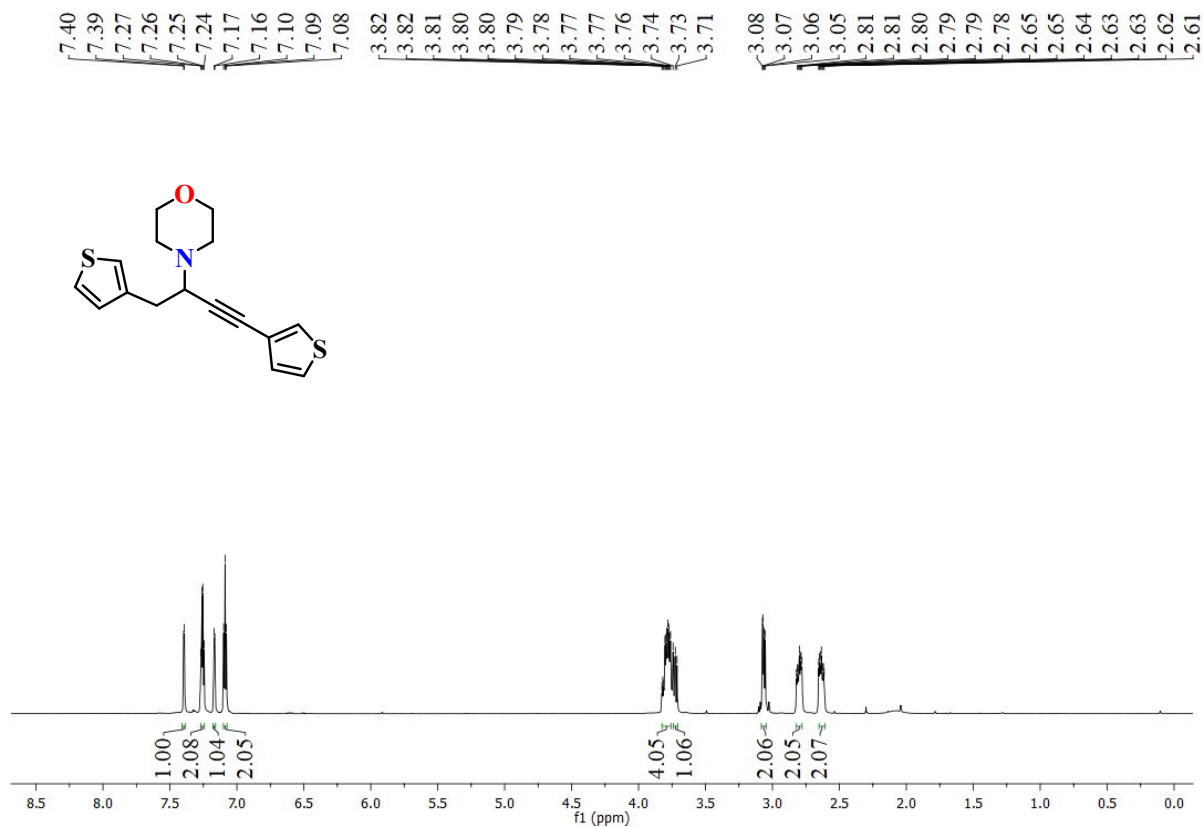

**Figure S72.** <sup>1</sup>H NMR (25 °C, 500 MHz) spectrum of the trisubstituted product **13b** from 3-ethynylthiophene in CDCl<sub>3</sub>.

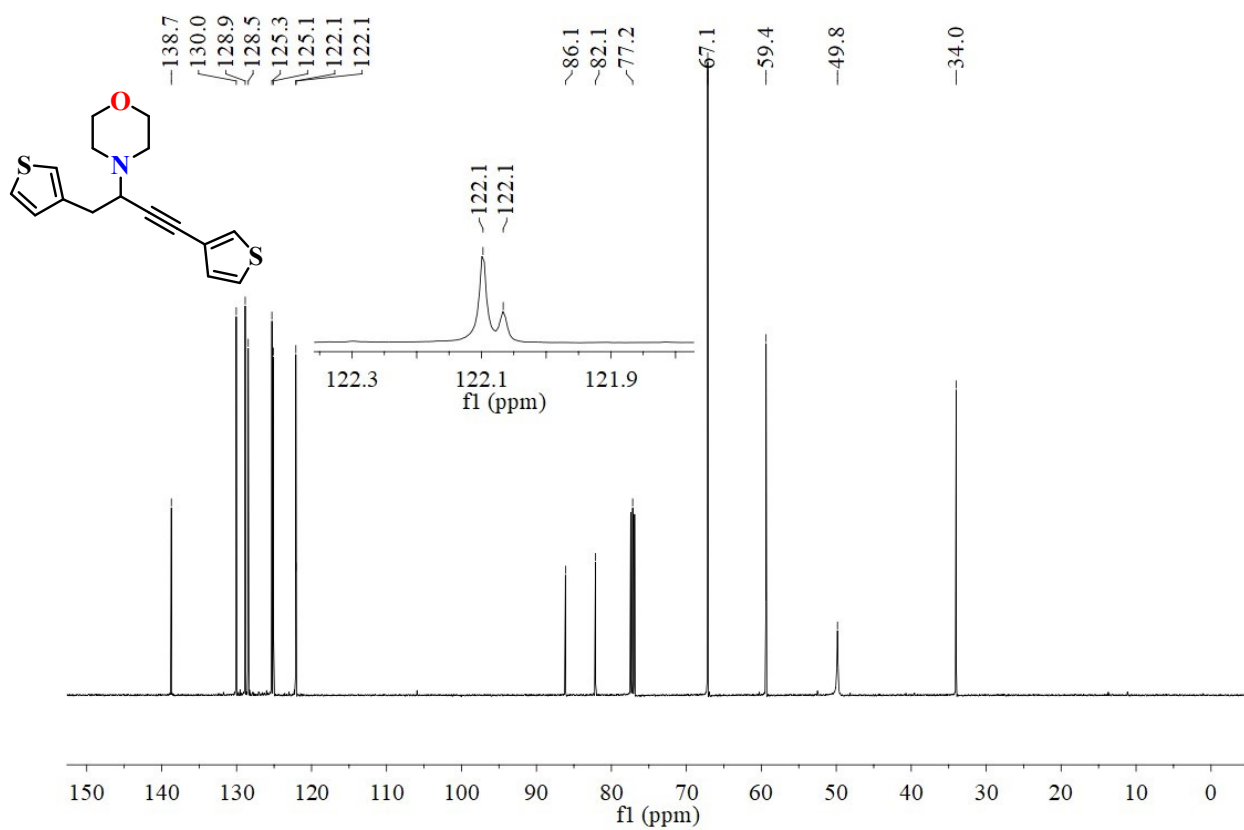

**Figure S73.**  $^{13}\text{C}\{^1\text{H}\}$  NMR (25 °C, 125.7 MHz) spectrum of the trisubstituted product **13b** from 3-ethynylthiophene in  $\text{CDCl}_3$ .

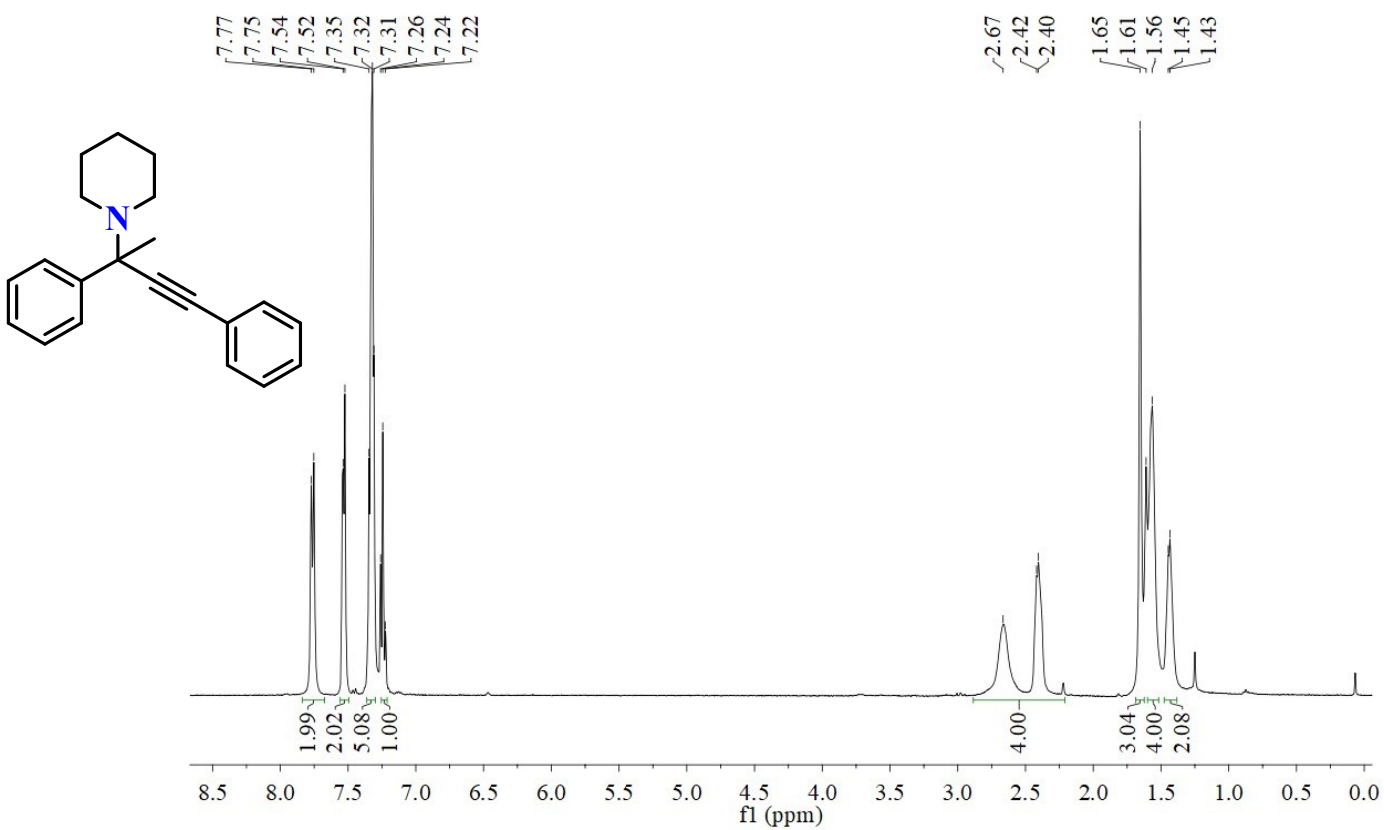

**Figure S74.** <sup>1</sup>H NMR (25 °C, 400 MHz) spectrum of the tetrasubstituted product **14a** from piperidine in CDCl<sub>3</sub>.

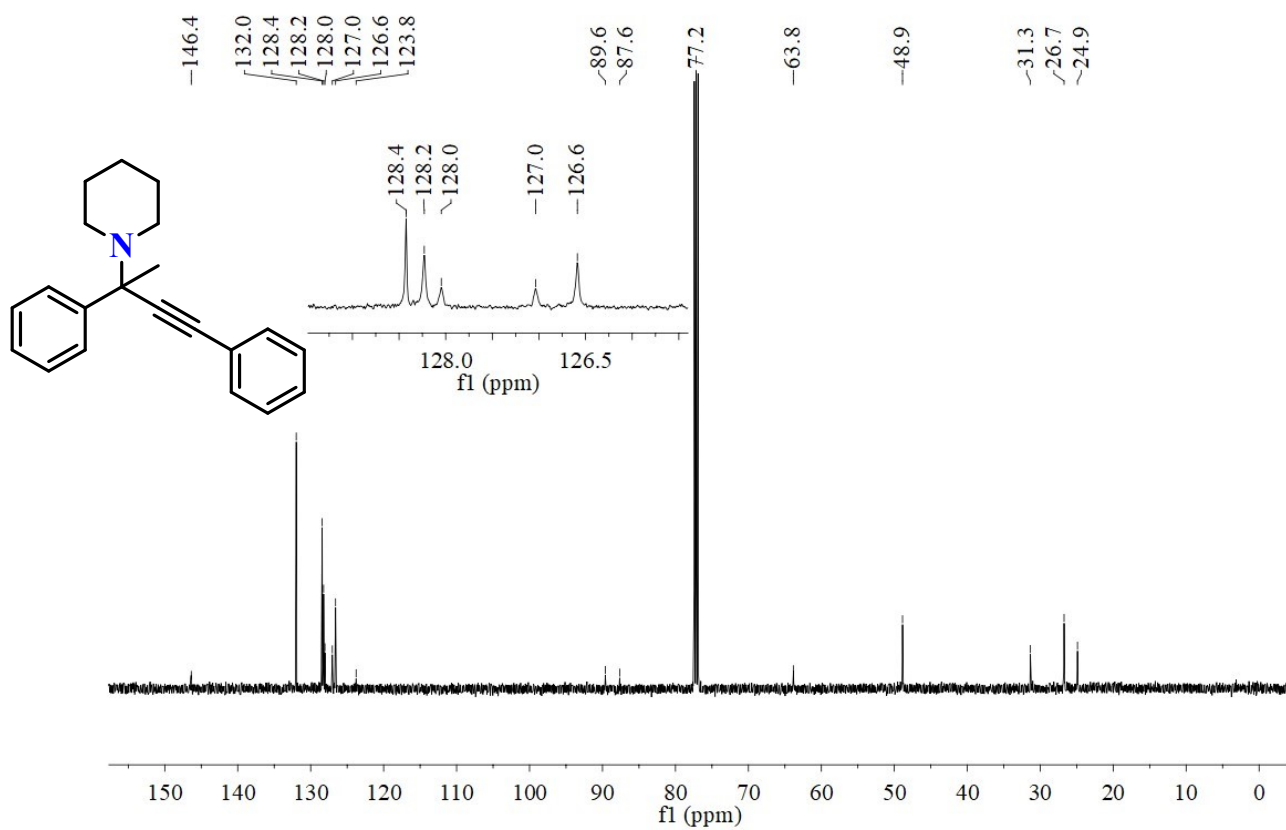

**Figure S75.**  $^{13}\text{C}\{^1\text{H}\}$  NMR (25 °C, 125.7 MHz) spectrum of the tetrasubstituted product **14a** from piperidine in  $\text{CDCl}_3$ .

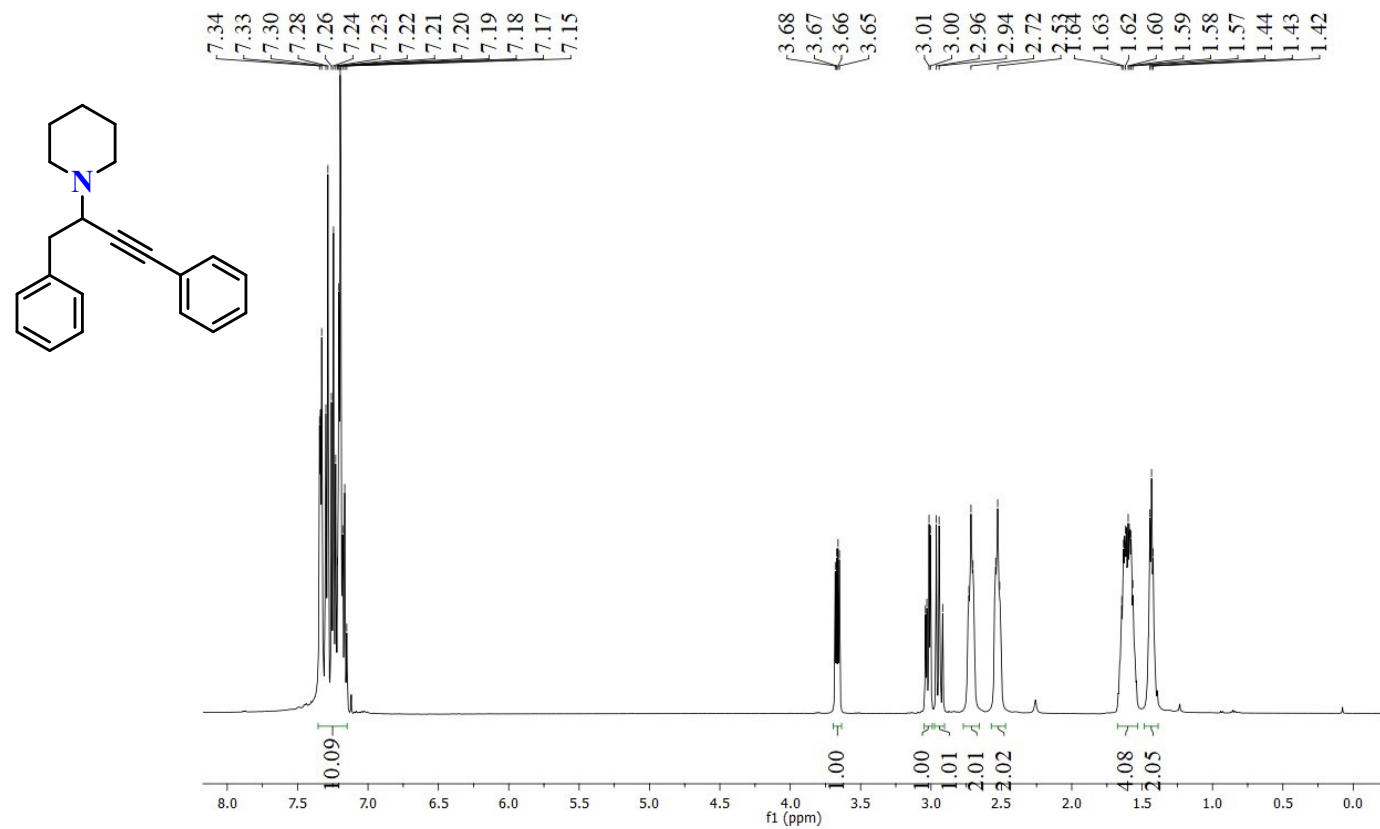

**Figure S76.**  $^1\text{H}$  NMR (25 °C, 400 MHz) spectrum the trisubstituted product **14b** from piperidine  $\text{CDCl}_3$ .

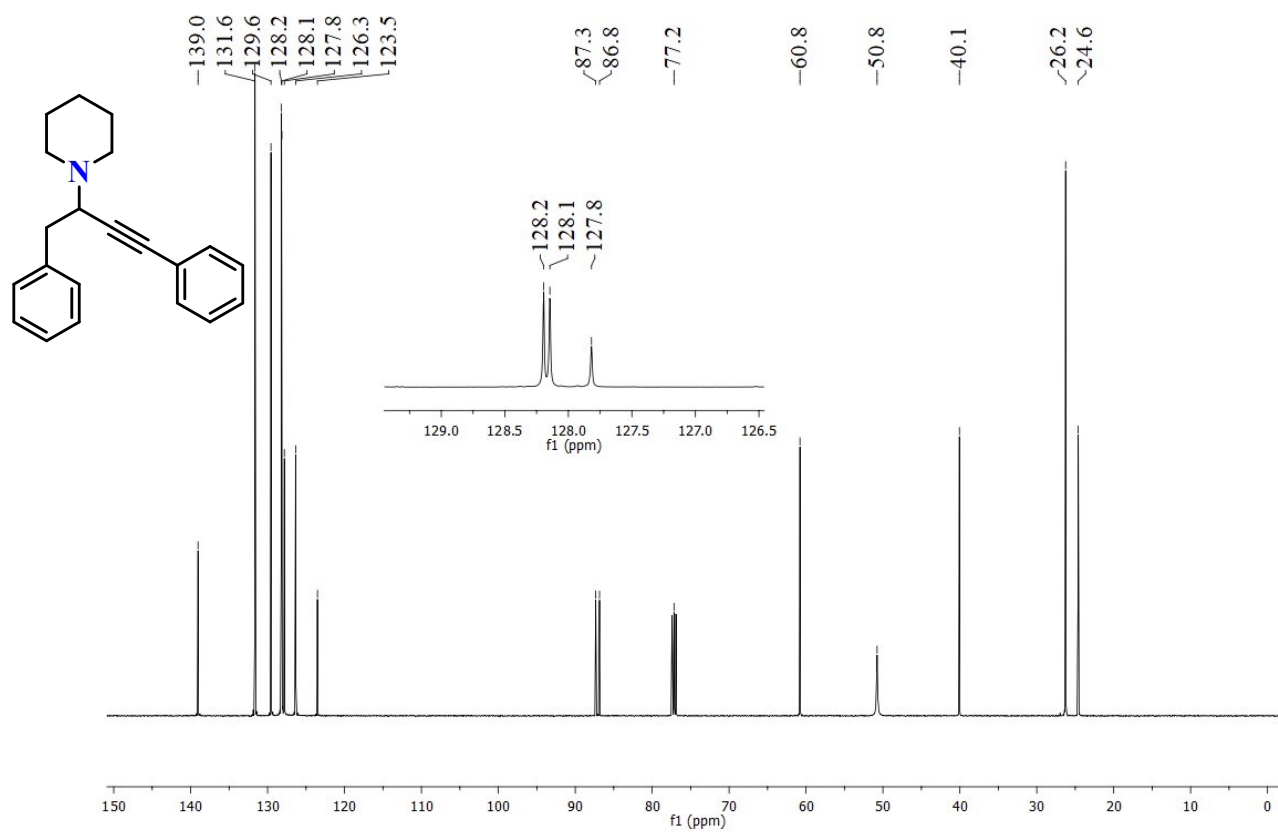

**Figure S77.**  $^{13}\text{C}\{^1\text{H}\}$  NMR (25 °C, 125.7 MHz) spectrum of the trisubstituted product **14b** from piperidine  $\text{CDCl}_3$ .

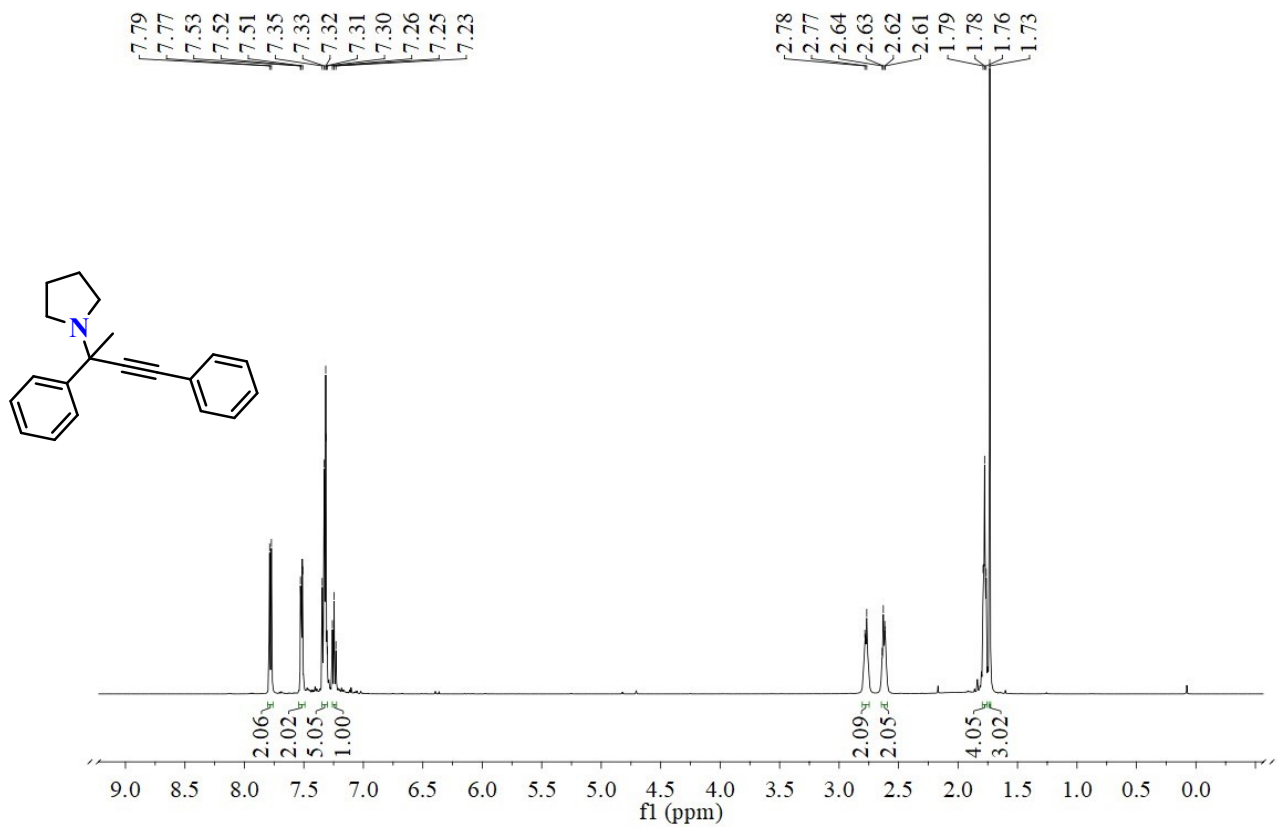

**Figure S78.** <sup>1</sup>H NMR (25 °C, 500 MHz) spectrum of the tetrasubstituted product **15a** from pyrrolidine in CDCl<sub>3</sub>.

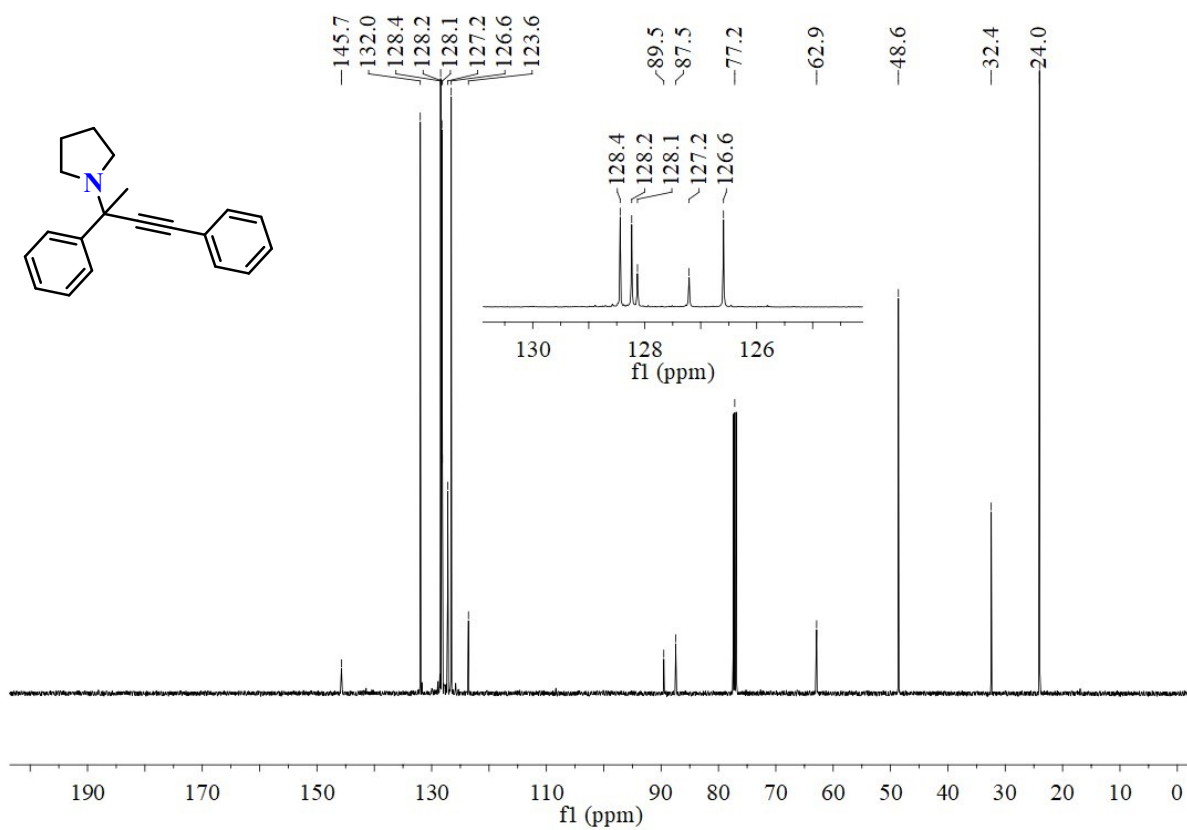

**Figure S79.**  $^{13}\text{C}\{^1\text{H}\}$  NMR (25 °C, 125.7 MHz) spectrum of the tetrasubstituted product **15a** from pyrrolidine in  $\text{CDCl}_3$ .



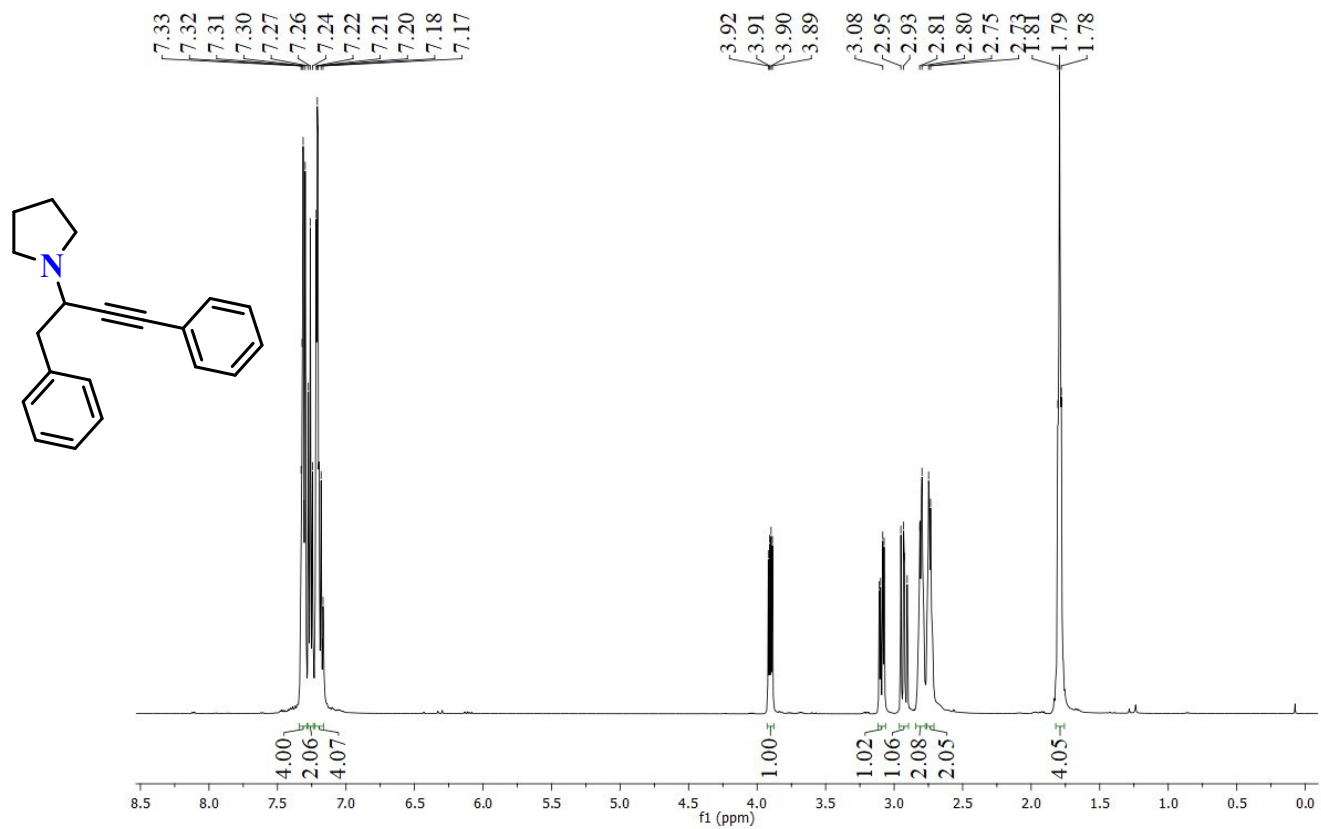

**Figure S80.** <sup>1</sup>H NMR (25 °C, 500 MHz) spectrum of the trisubstituted product **15b** from pyrrolidine in CDCl<sub>3</sub>.

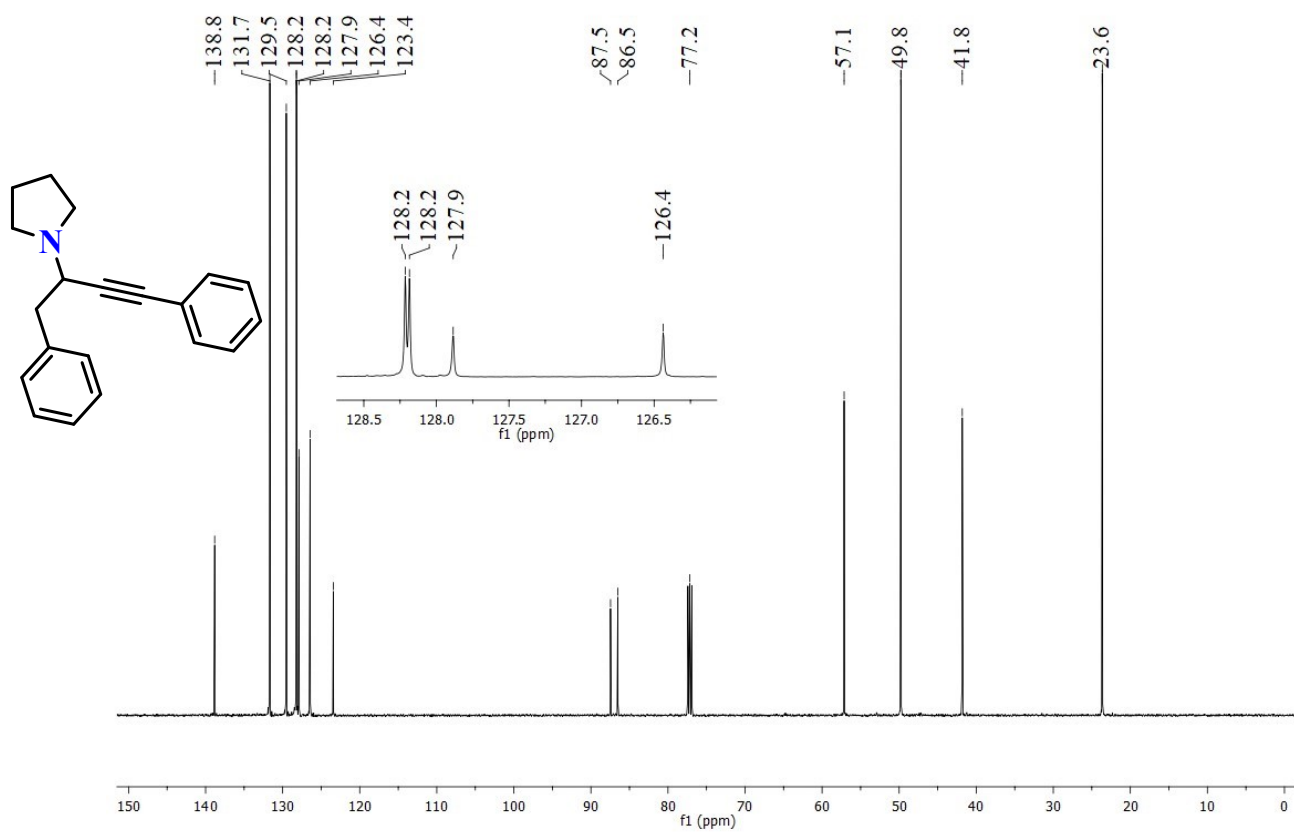

**Figure S81.**  $^{13}\text{C}\{^1\text{H}\}$  NMR (25 °C, 125.7 MHz) spectrum of the trisubstituted product **15b** from pyrrolidine in  $\text{CDCl}_3$ .

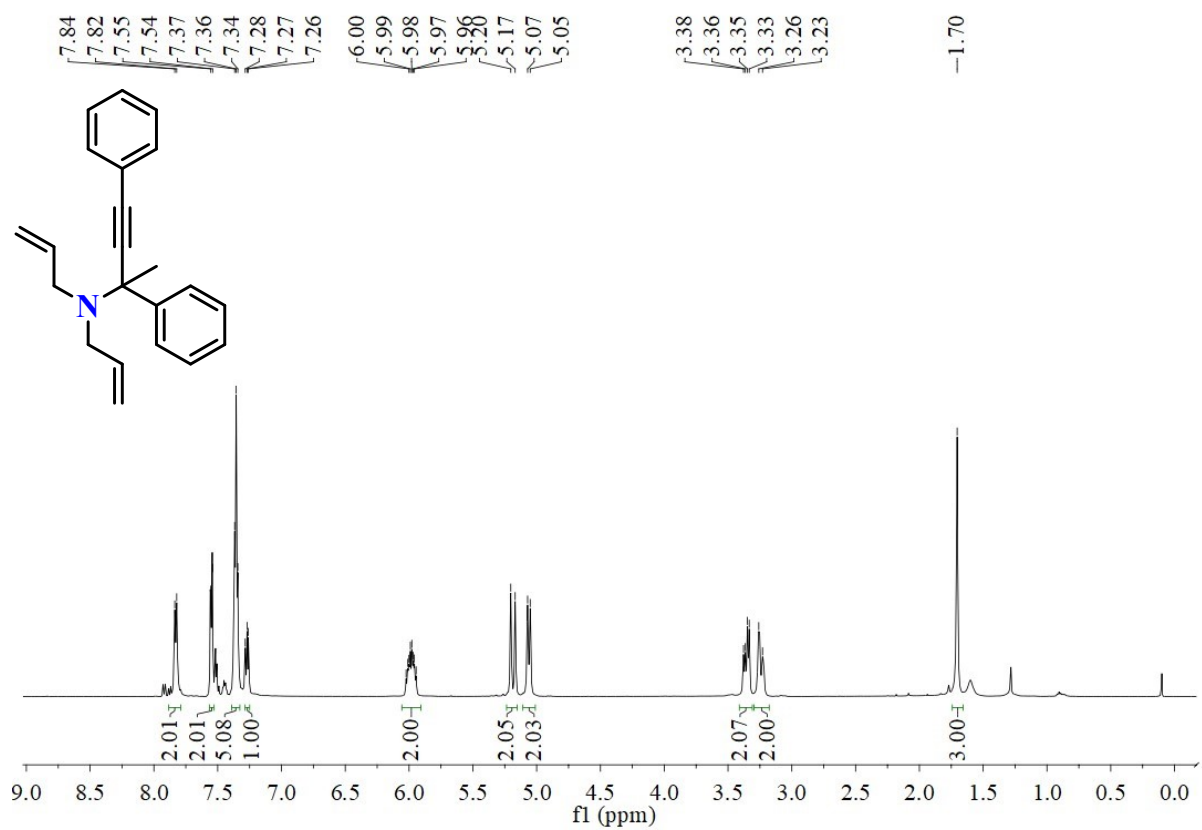

**Figure S82.** <sup>1</sup>H NMR (25 °C, 500 MHz) spectrum of the tetrasubstituted product **16a** from diallylamine in CDCl<sub>3</sub>.

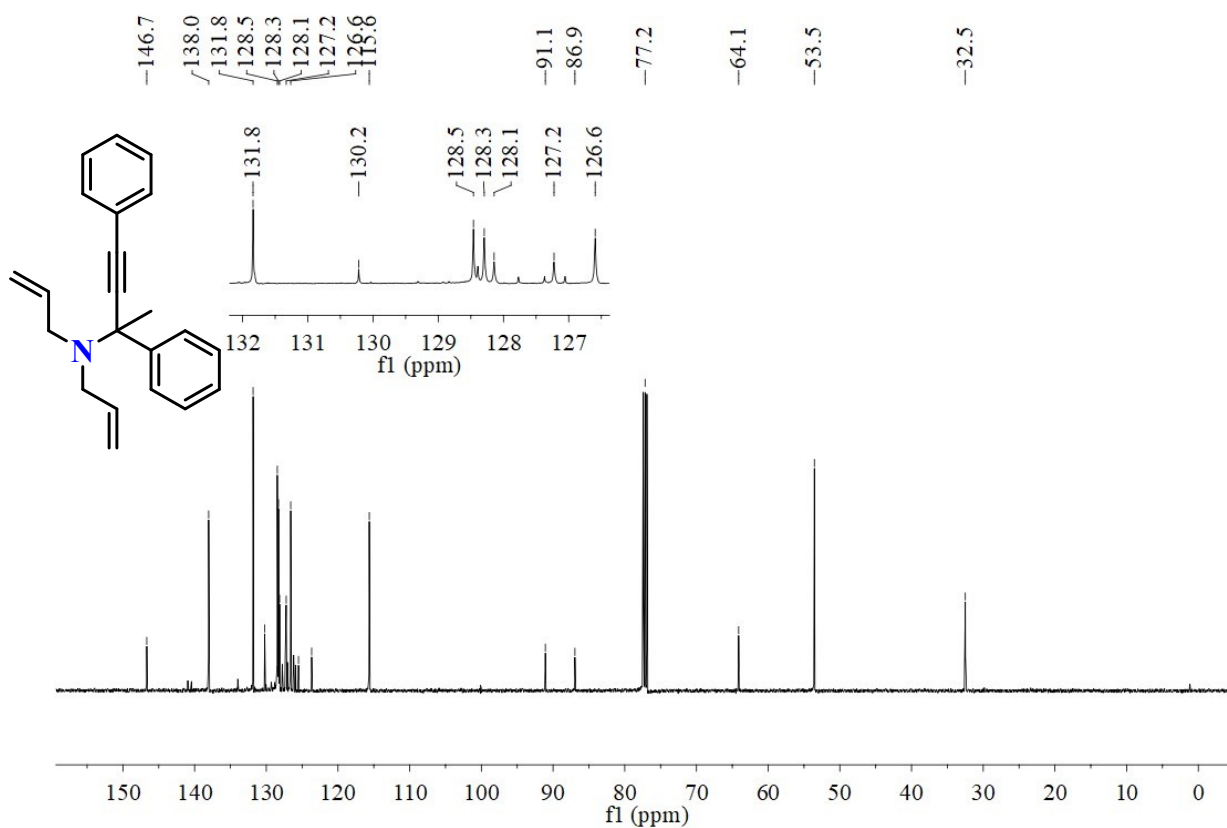

**Figure S83.**  $^{13}\text{C}\{^1\text{H}\}$  NMR (25 °C, 125.7 MHz) spectrum of the tetrasubstituted product **16a** from diallylamine in  $\text{CDCl}_3$ .

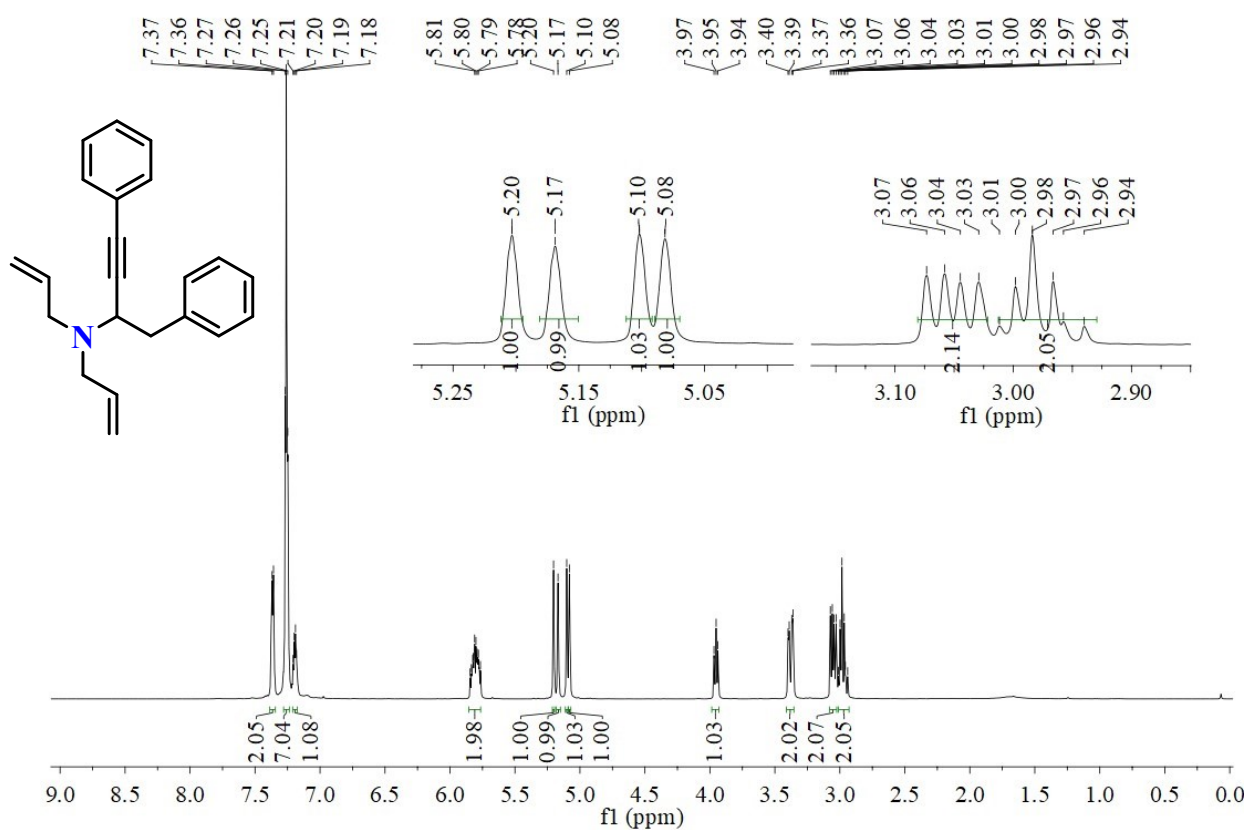

**Figure S84.** <sup>1</sup>H NMR (25 °C, 500 MHz) spectrum of the trisubstituted product **16b** from diallylamine in CDCl<sub>3</sub>.

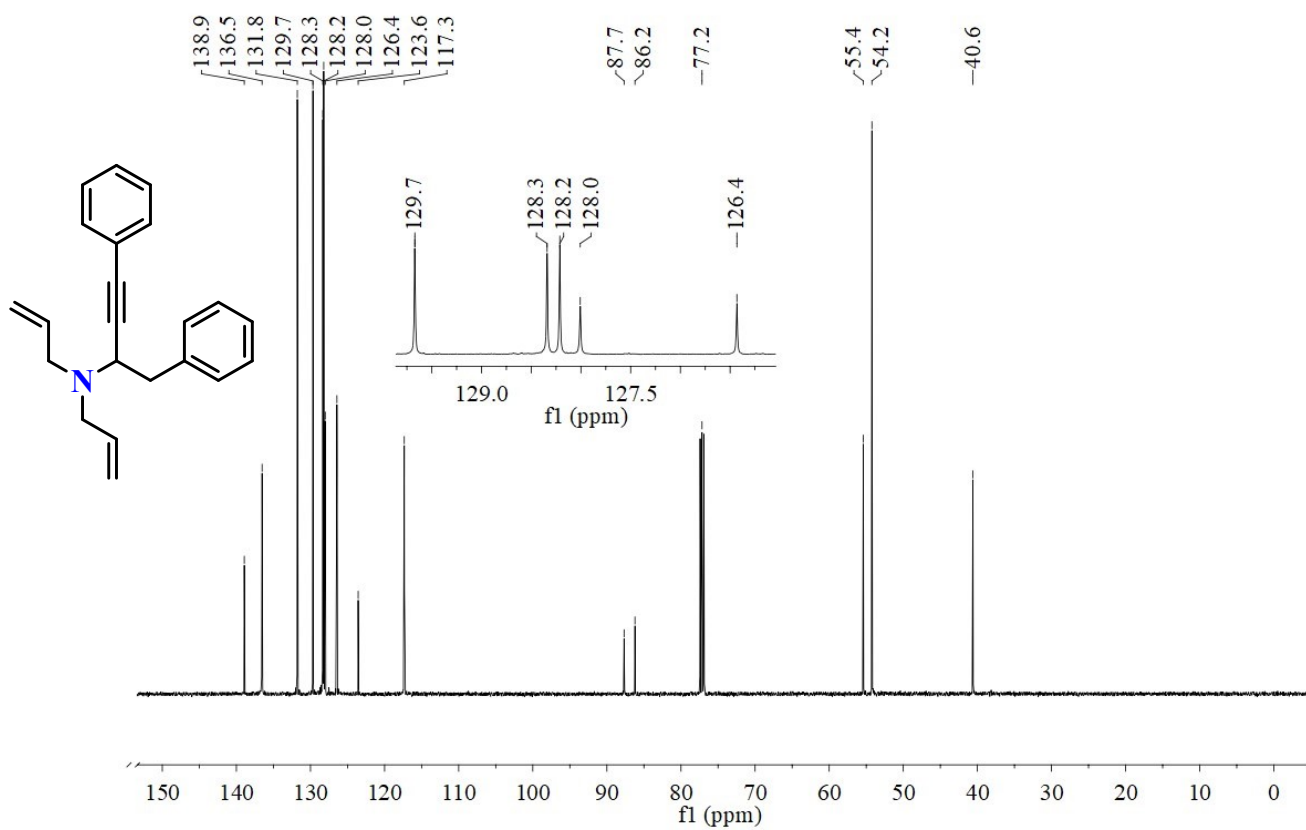

**Figure S85.**  $^{13}\text{C}\{^1\text{H}\}$  NMR (25 °C, 125.7 MHz) spectrum of the trisubstituted product **16b** from diallylamine in  $\text{CDCl}_3$ .

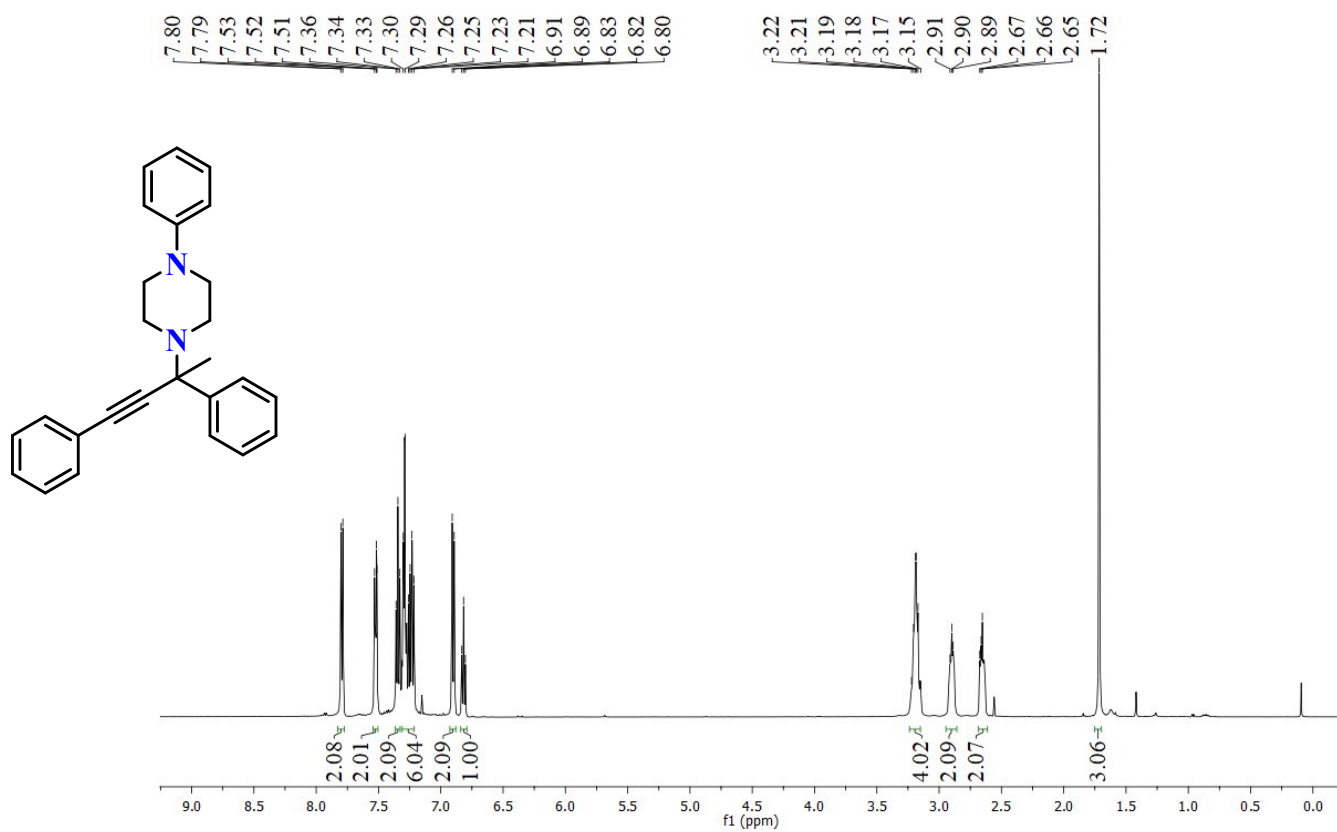

**Figure S86.** <sup>1</sup>H NMR (25 °C, 500 MHz) spectrum of the tetrasubstituted product **17a** from *N*-phenylpiperazine in CDCl<sub>3</sub>.

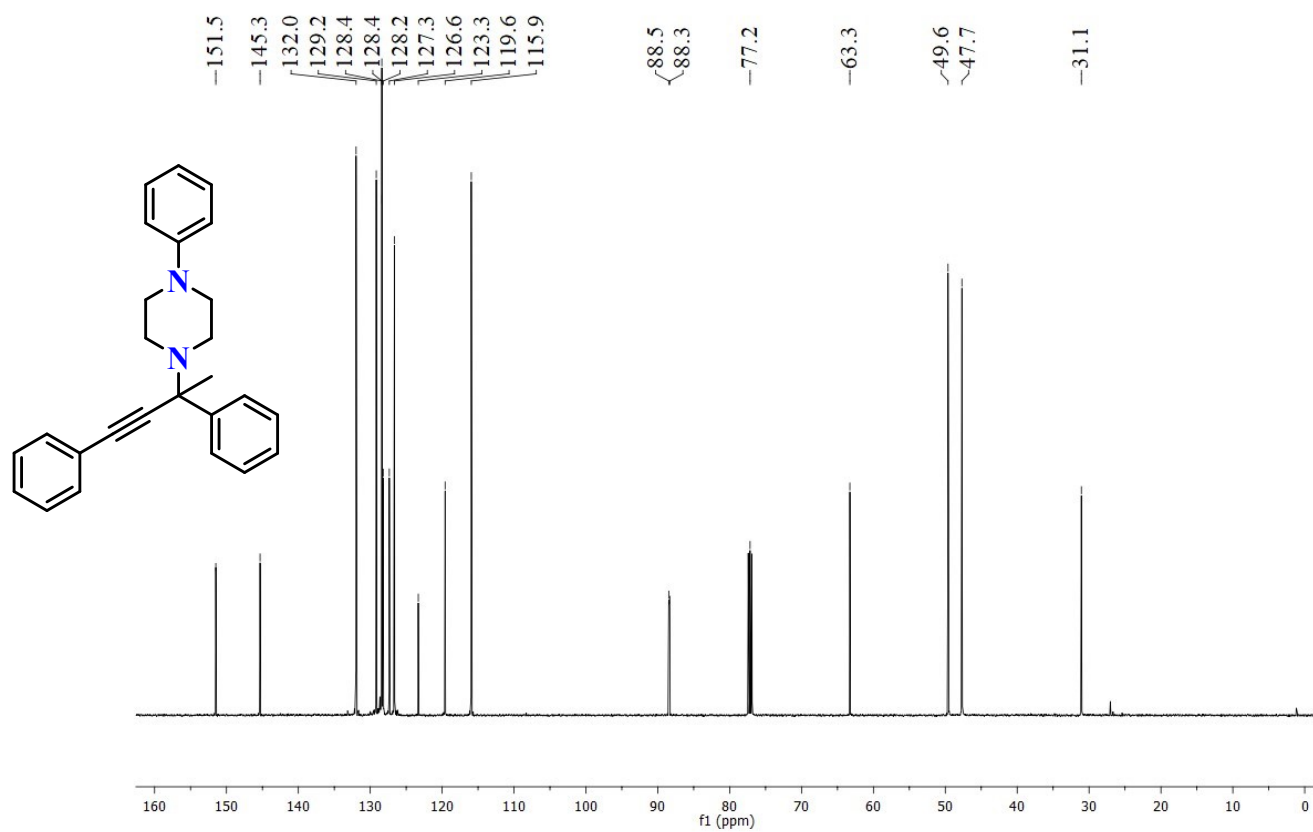

**Figure S87.**  $^{13}\text{C}\{^1\text{H}\}$  NMR (25 °C, 125.7 MHz) spectrum of the tetrasubstituted product **17a** from *N*-phenylpiperazine in  $\text{CDCl}_3$ .



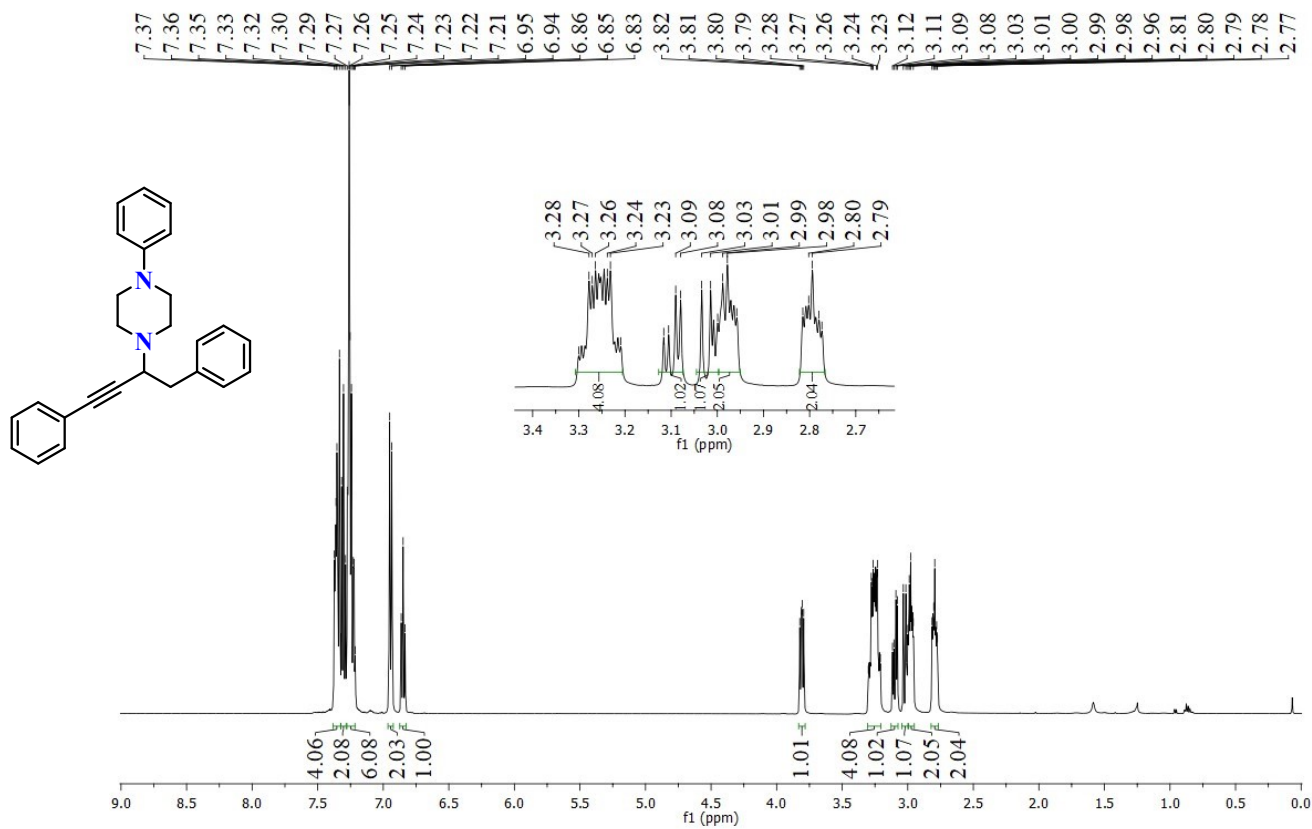

**Figure S88.** <sup>1</sup>H NMR (25 °C, 500 MHz) spectrum of the trisubstituted product **17b** from *N*-phenylpiperazine in CDCl<sub>3</sub>.

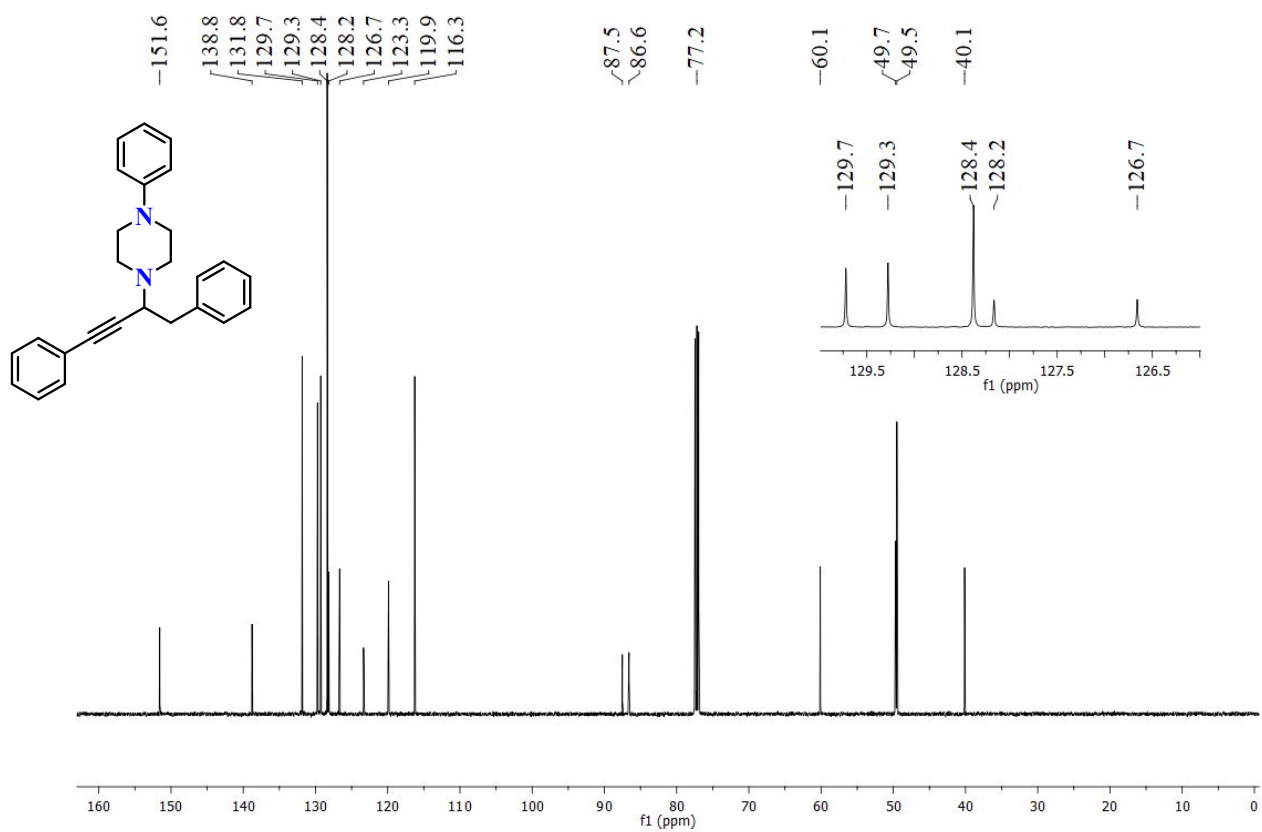

**Figure S89.**  $^{13}\text{C}\{^1\text{H}\}$  NMR (25 °C, 125.7 MHz) spectrum of the trisubstituted product **17b** from *N*-phenylpiperazine in  $\text{CDCl}_3$ .

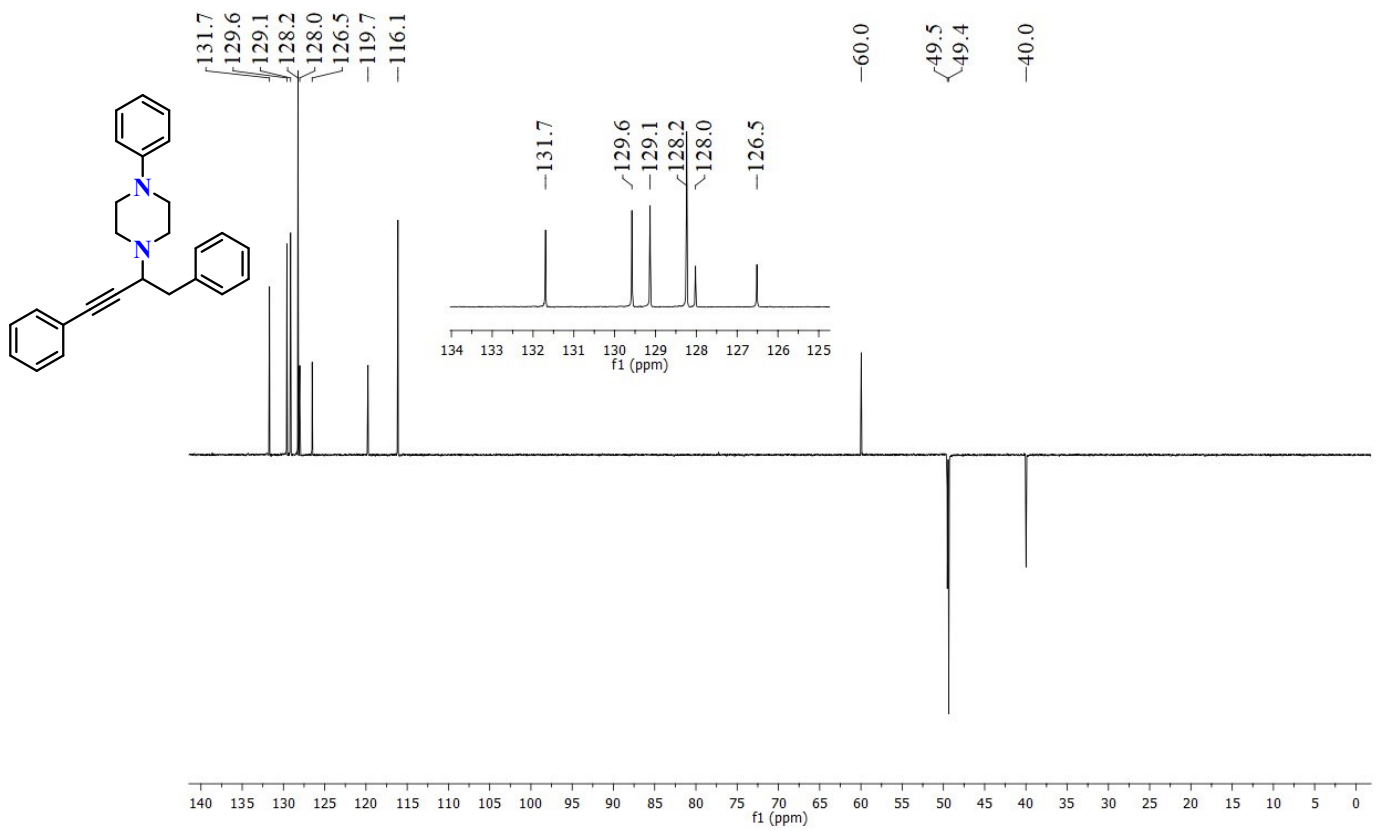

**Figure S90.**  $^{13}\text{C}\{^1\text{H}\}$  DEPT NMR (25 °C, 125.7 MHz) spectrum of the trisubstituted product **17b** from *N*-phenylpiperazine in  $\text{CDCl}_3$ .

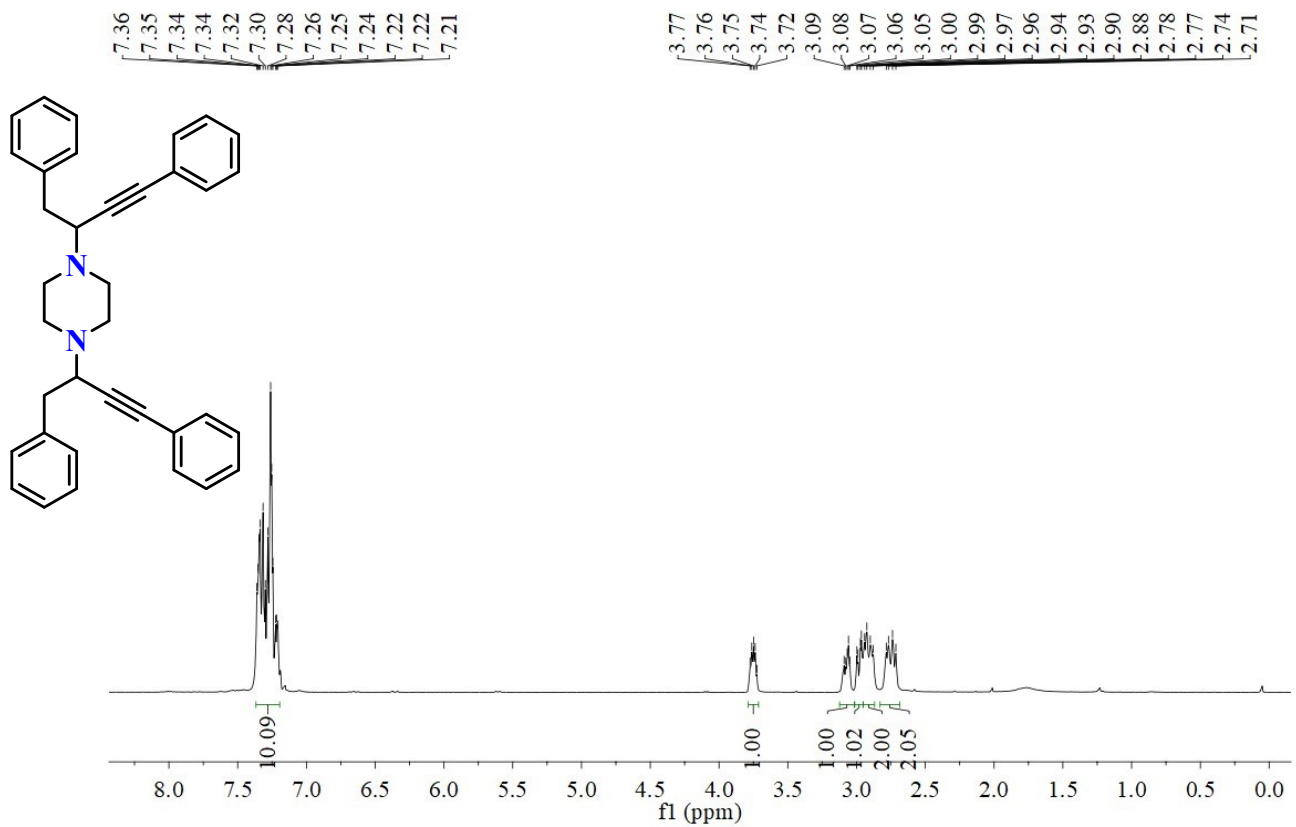

**Figure S91.** <sup>1</sup>H NMR (25 °C, 400 MHz) spectrum of the trisubstituted product **18** from piperazine in CDCl<sub>3</sub>.

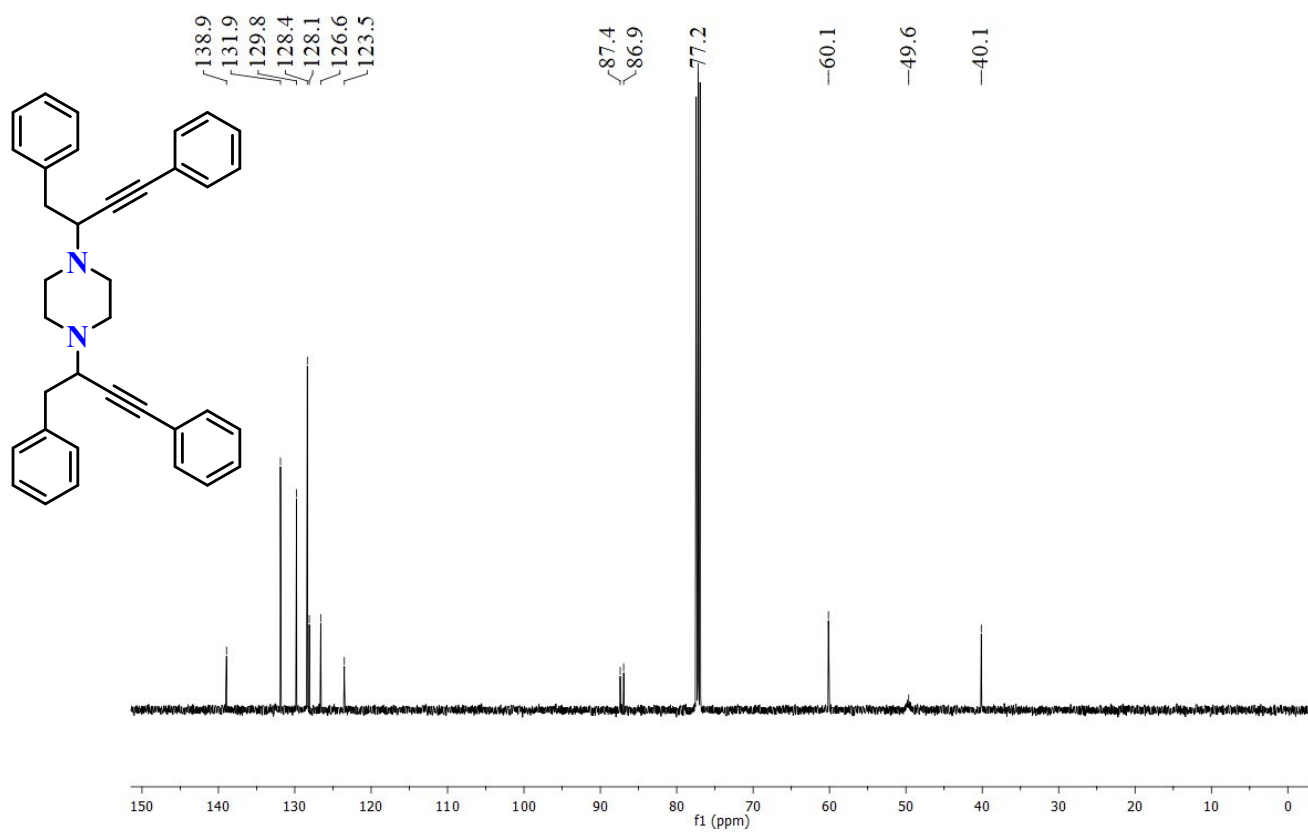

**Figure S92.**  $^{13}\text{C}\{^1\text{H}\}$  NMR (25 °C, 125.7 MHz) spectrum of the trisubstituted product **18** from piperazine in  $\text{CDCl}_3$ .

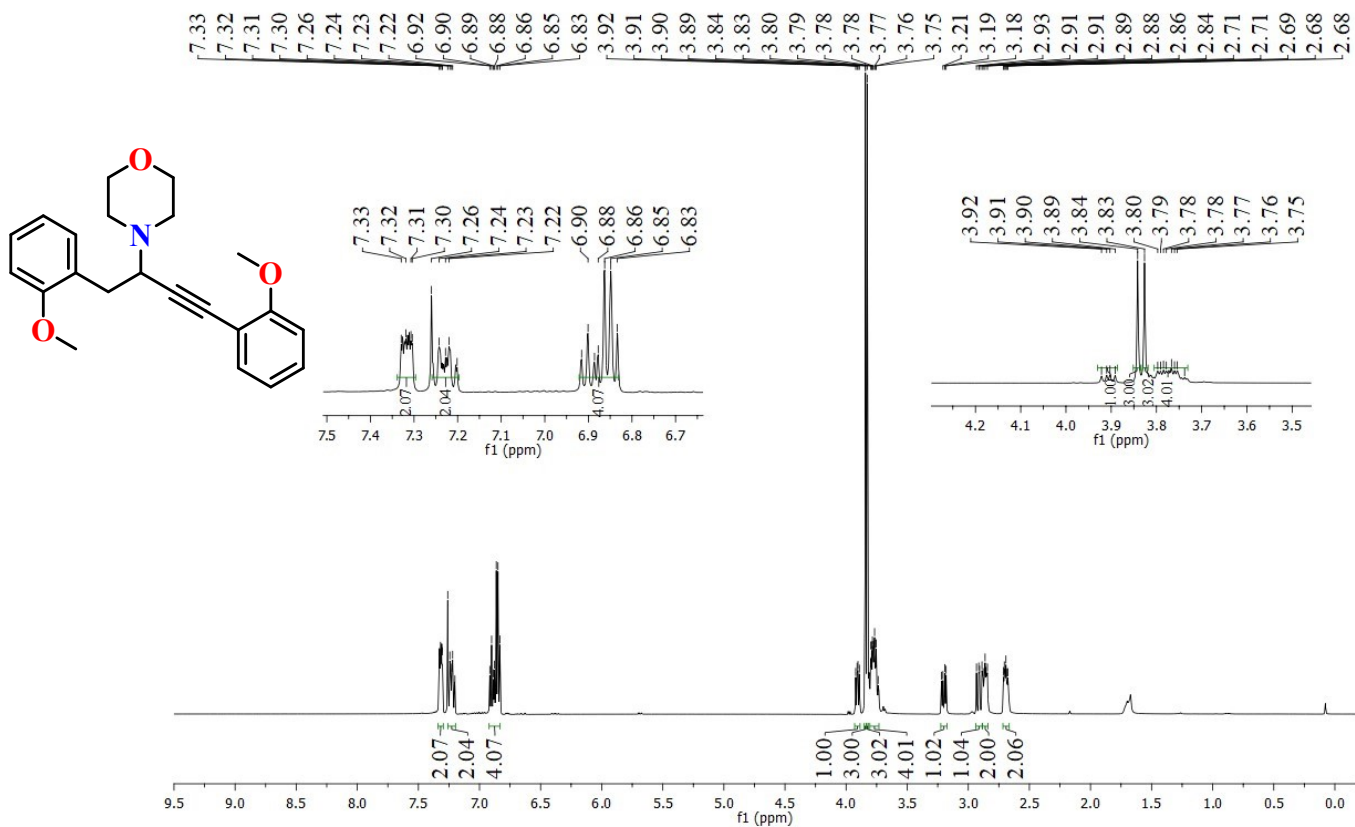

**Figure S93.** <sup>1</sup>H NMR (25 °C, 400 MHz) spectrum of the trisubstituted product **19** from 2-ethynylanisole in CDCl<sub>3</sub>.

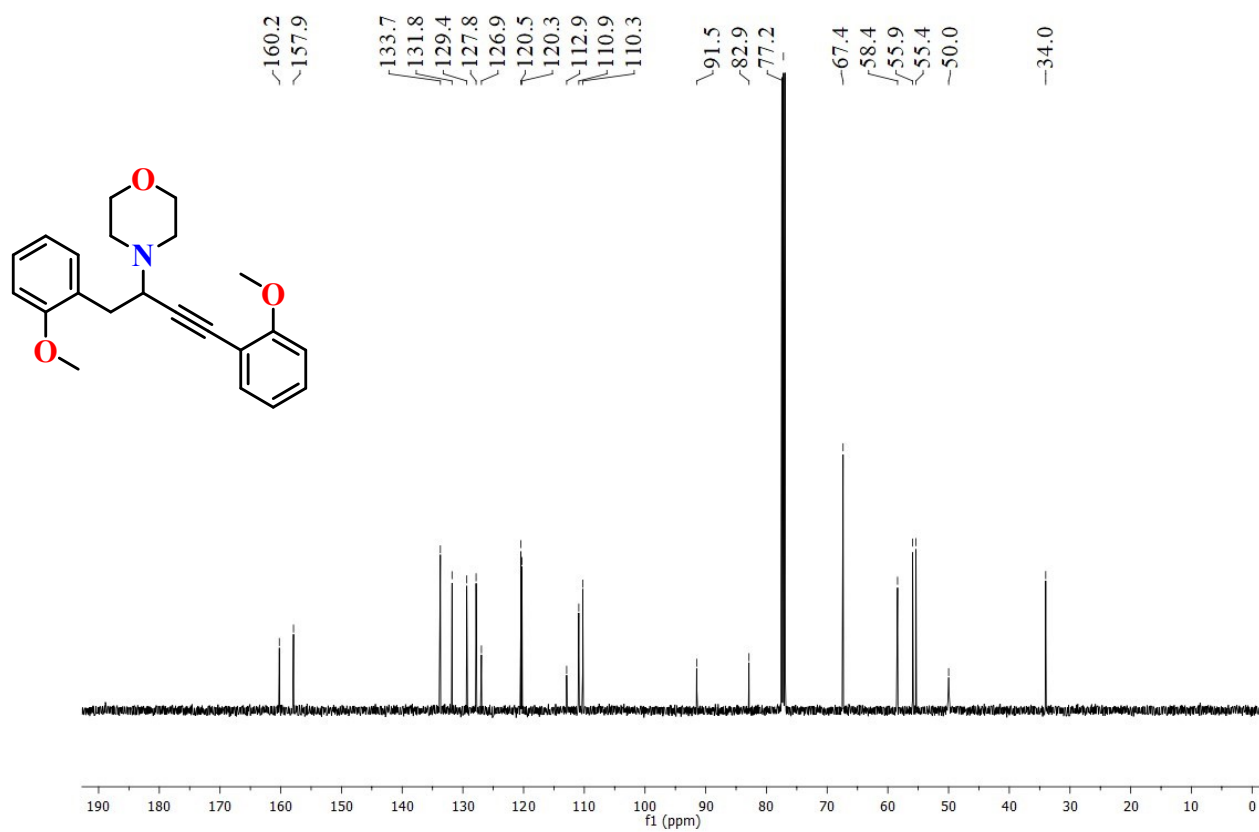

**Figure S94.**  $^{13}\text{C}\{^1\text{H}\}$  NMR (25 °C, 125.7 MHz) spectrum of the trisubstituted product **19** from 2-ethynylanisole in  $\text{CDCl}_3$ .

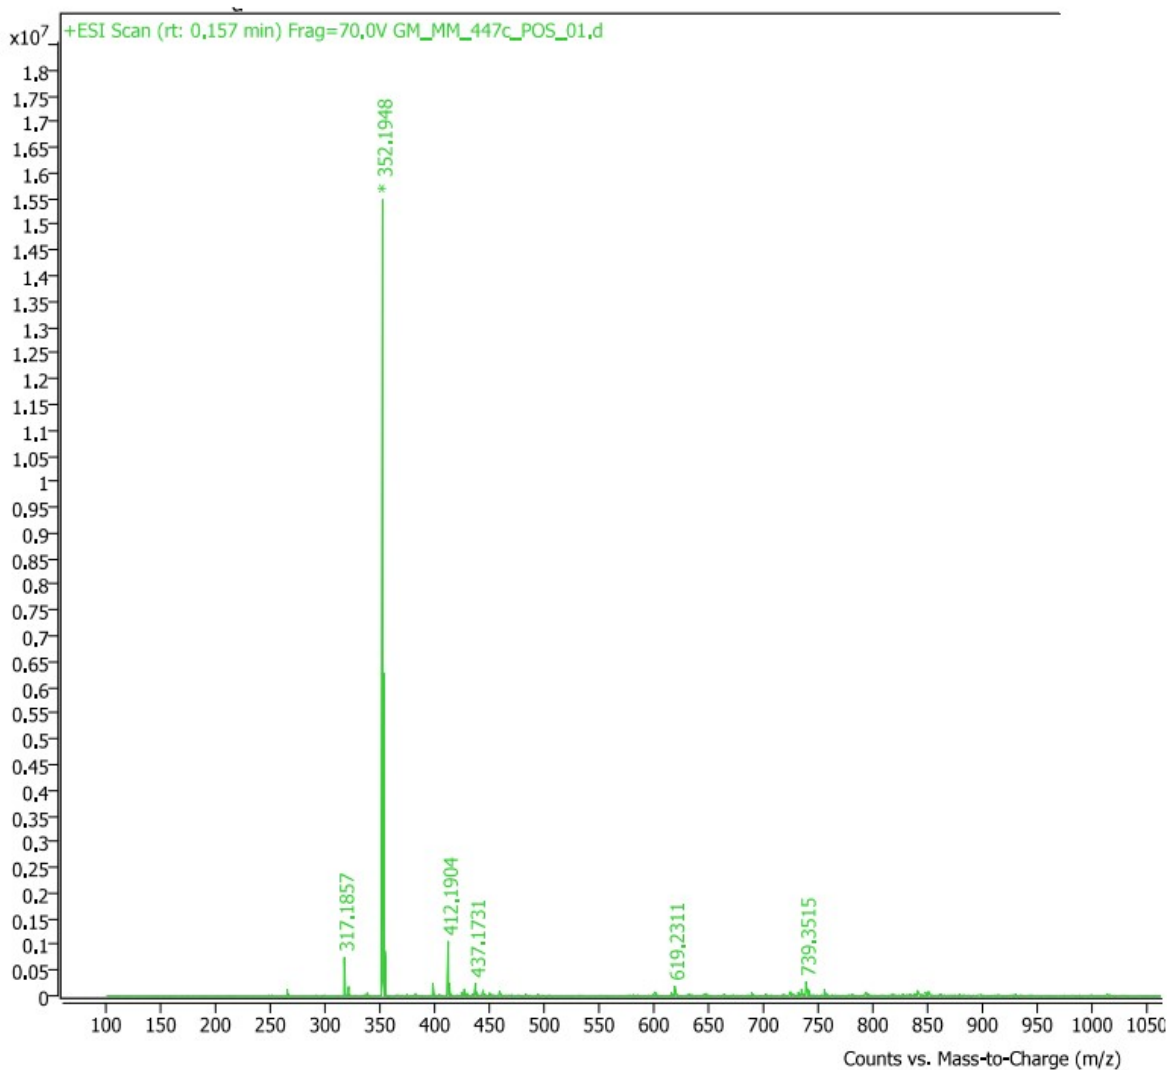

## Target Screening Report

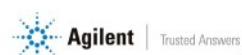

### Compound Spectra (overlaid)

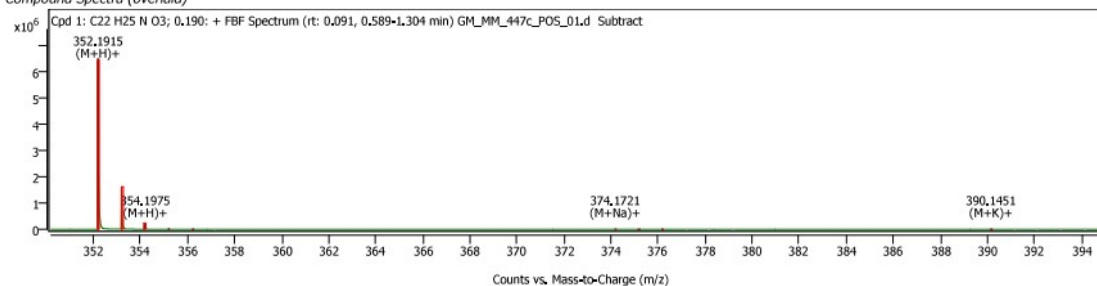

### Compound ID Table

| Name | Formula                                          | Species                                                         | RT    | RT Diff | Mass     | CAS | ID Source | Score | Score (Lib) | Score (Tgt) |
|------|--------------------------------------------------|-----------------------------------------------------------------|-------|---------|----------|-----|-----------|-------|-------------|-------------|
|      | C <sub>22</sub> H <sub>25</sub> N O <sub>3</sub> | (M+H) <sup>+</sup><br>(M+Na) <sup>+</sup><br>(M+K) <sup>+</sup> | 0,190 |         | 351,1840 |     | FBF       | 98,03 |             | 98,03       |

**Figure S95.** HRMS (+ESI) spectrum of the trisubstituted product from 2-ethynylanisole **19**. calcd  $m/z$  for  $[M+H]^+$  C<sub>22</sub>H<sub>26</sub>NO<sub>3</sub><sup>+</sup>: 352.1907, found: 352.1915.



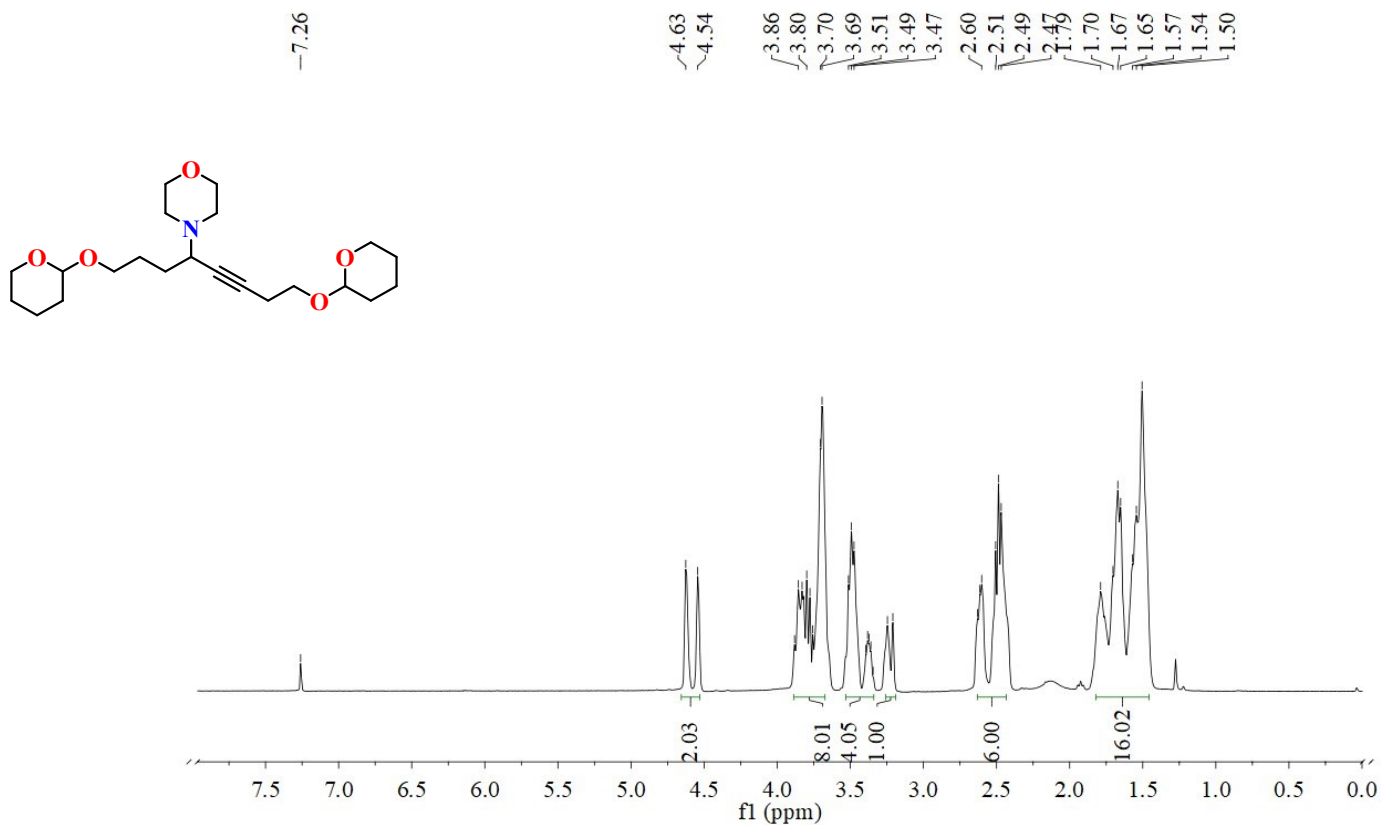

**Figure S96.** <sup>1</sup>H NMR (25 °C, 400 MHz) spectrum of the trisubstituted product **20** from (butynyloxy)tetrahydropyran in CDCl<sub>3</sub>.

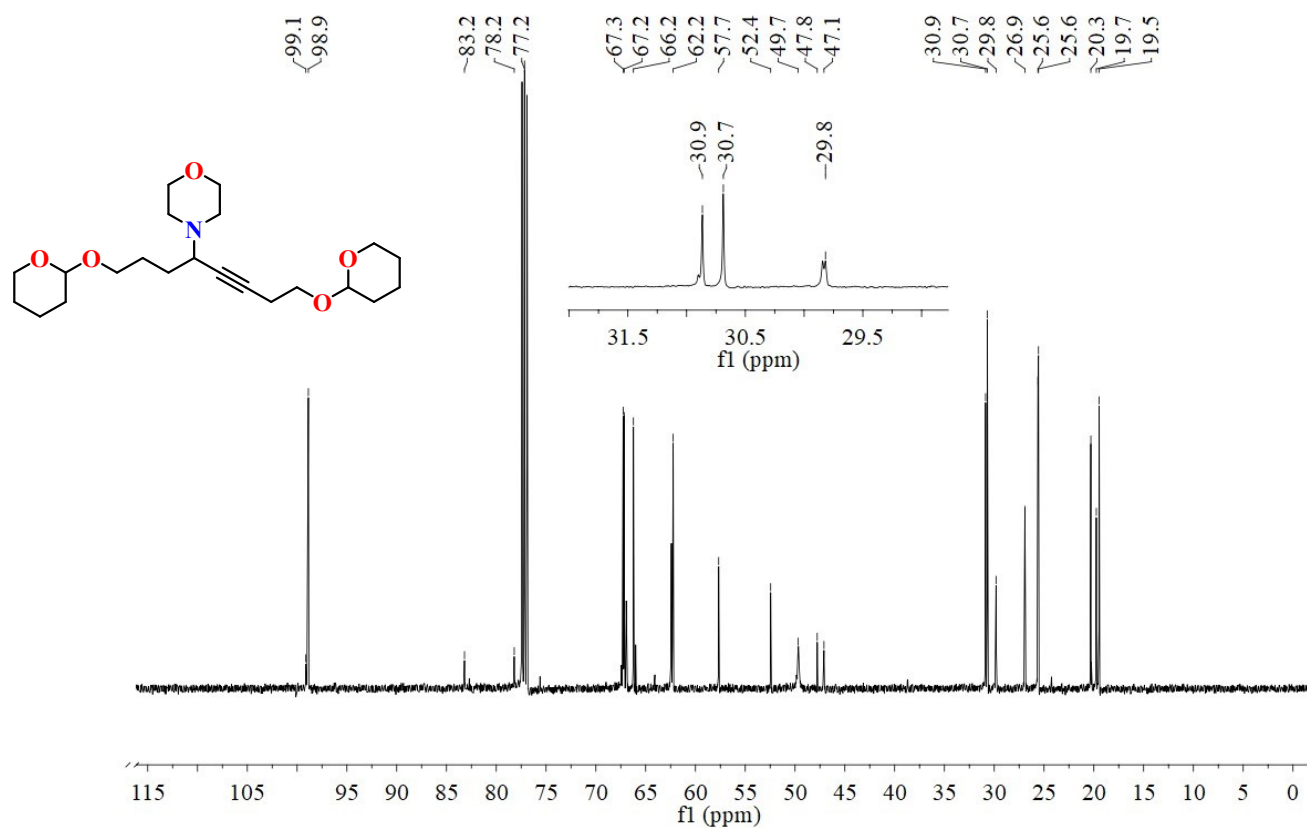

**Figure S97.**  $^{13}\text{C}\{^1\text{H}\}$  NMR (25 °C, 125.7 MHz) spectrum of the trisubstituted product **20** from (butynyloxy)tetrahydropyran in  $\text{CDCl}_3$ .

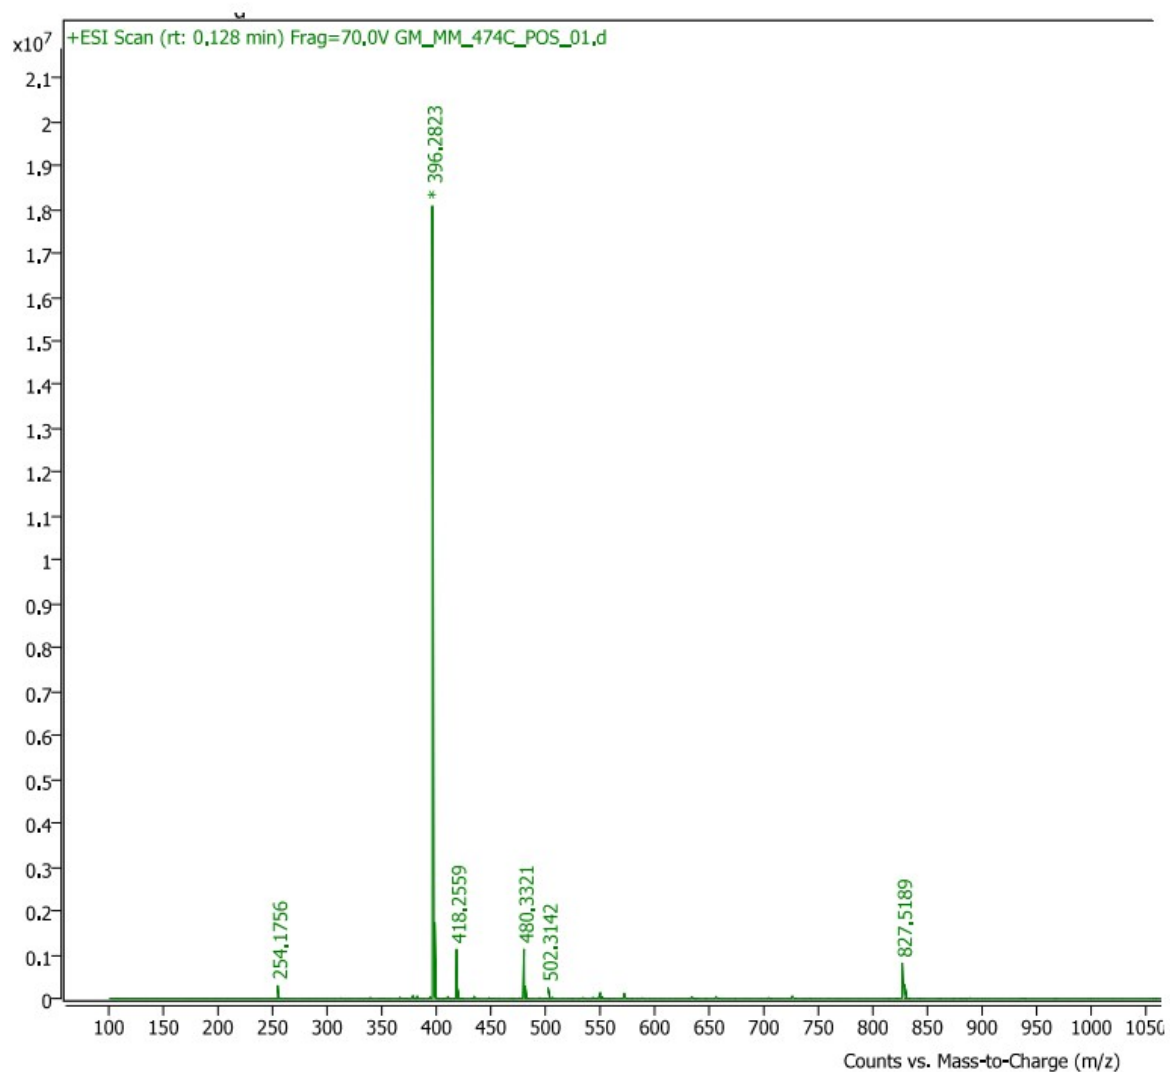

**Figure S98.** HRMS (+ESI) spectrum of the trisubstituted product **20** from (butynyloxy)tetrahydropyran. calcd  $m/z$  for  $[M+Na]^+$   $C_{22}H_{37}NO_5Na^+$ : 418.2564, found: 418.2559.

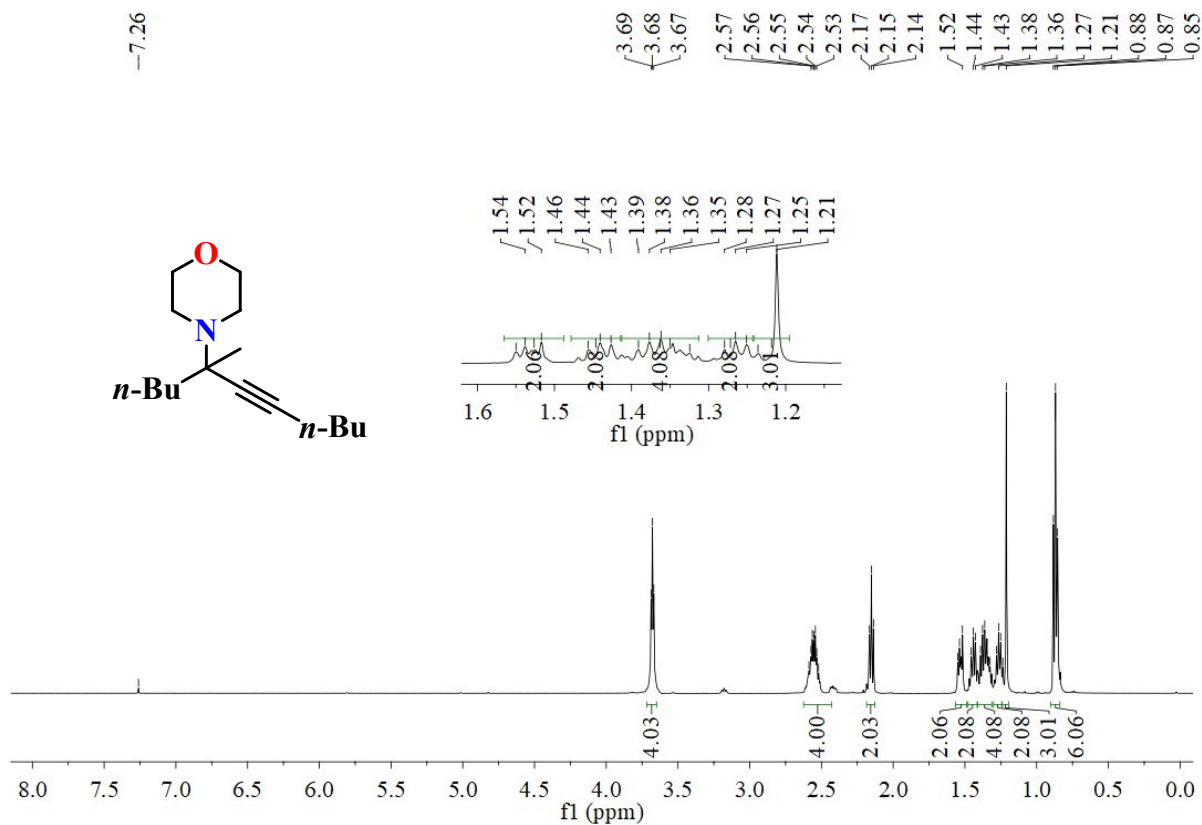

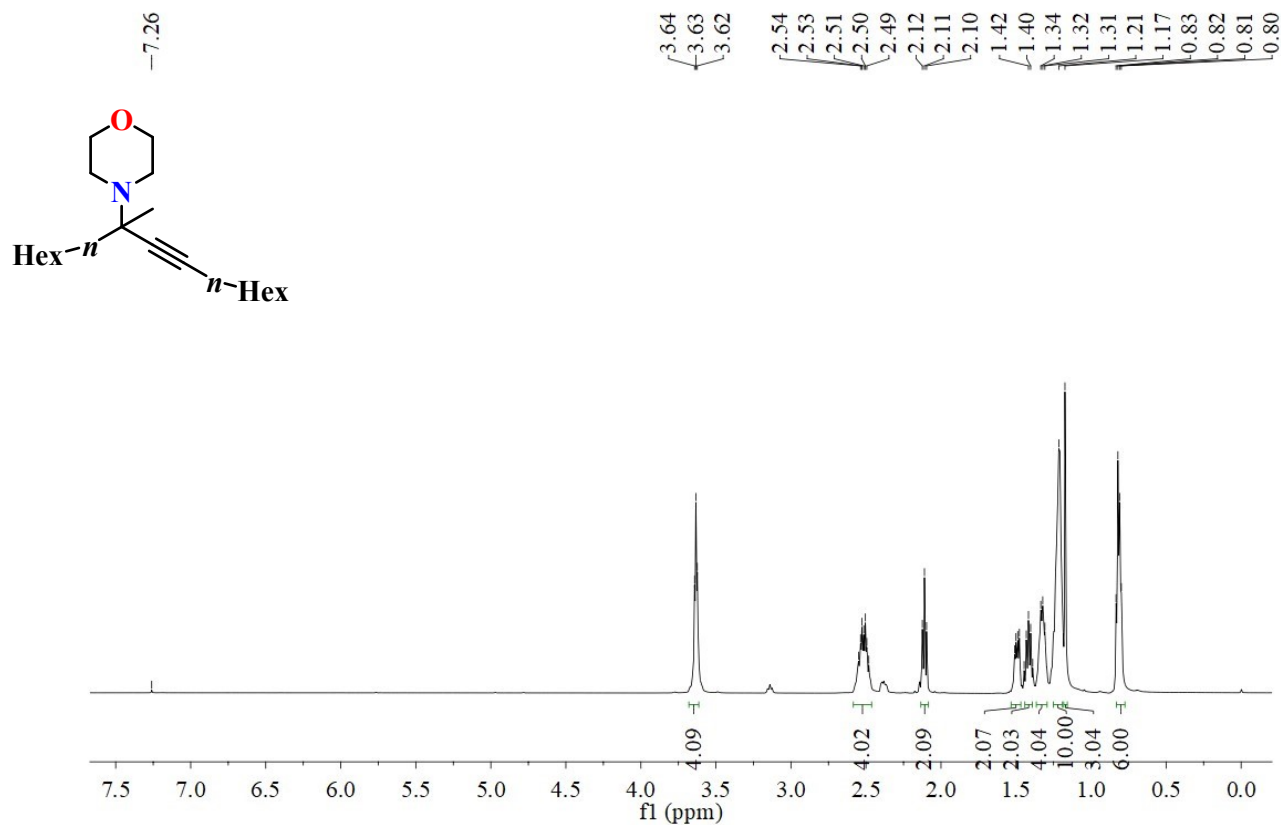

**Figure S100.** <sup>1</sup>H NMR (25 °C, 500 MHz) spectrum of the tetrasubstituted product **22** from 1-octyne in CDCl<sub>3</sub>.

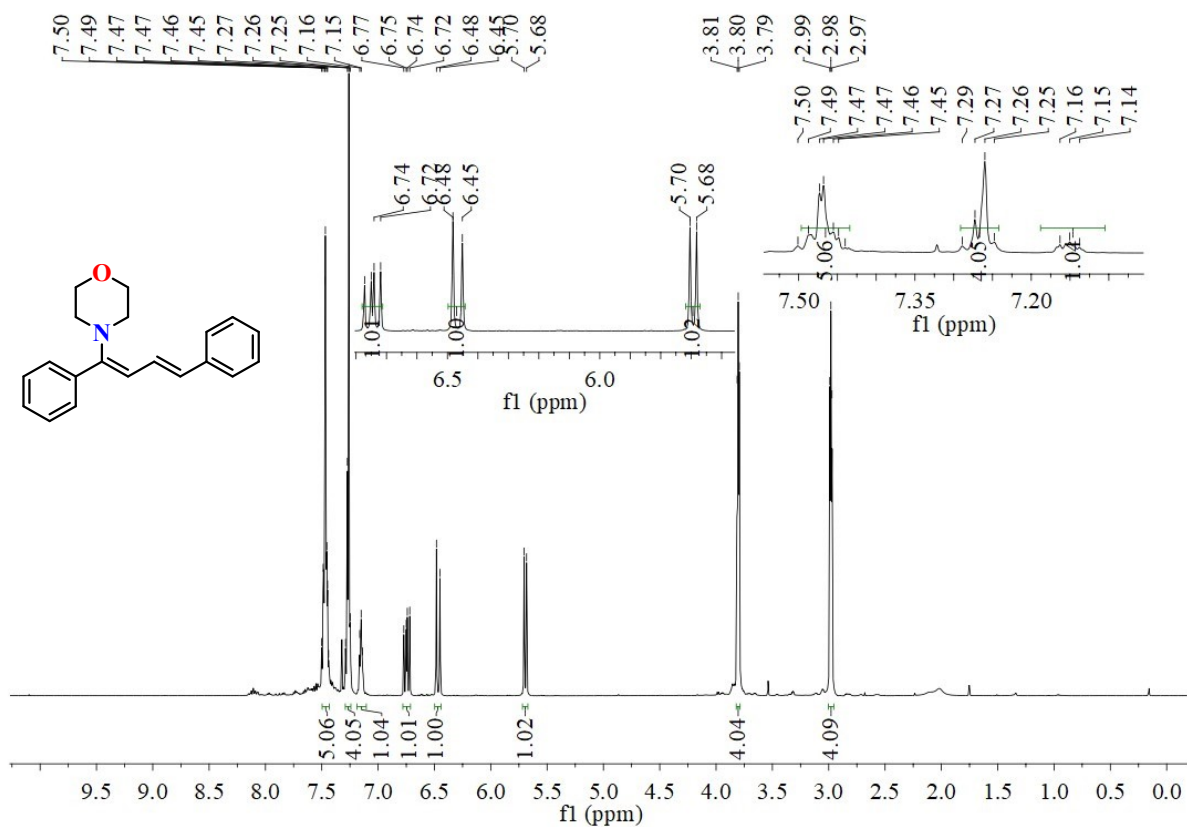

**Figure S101.** <sup>1</sup>H NMR (25 °C, 500 MHz) spectrum of 1-aminodiene **23** in CDCl<sub>3</sub>.

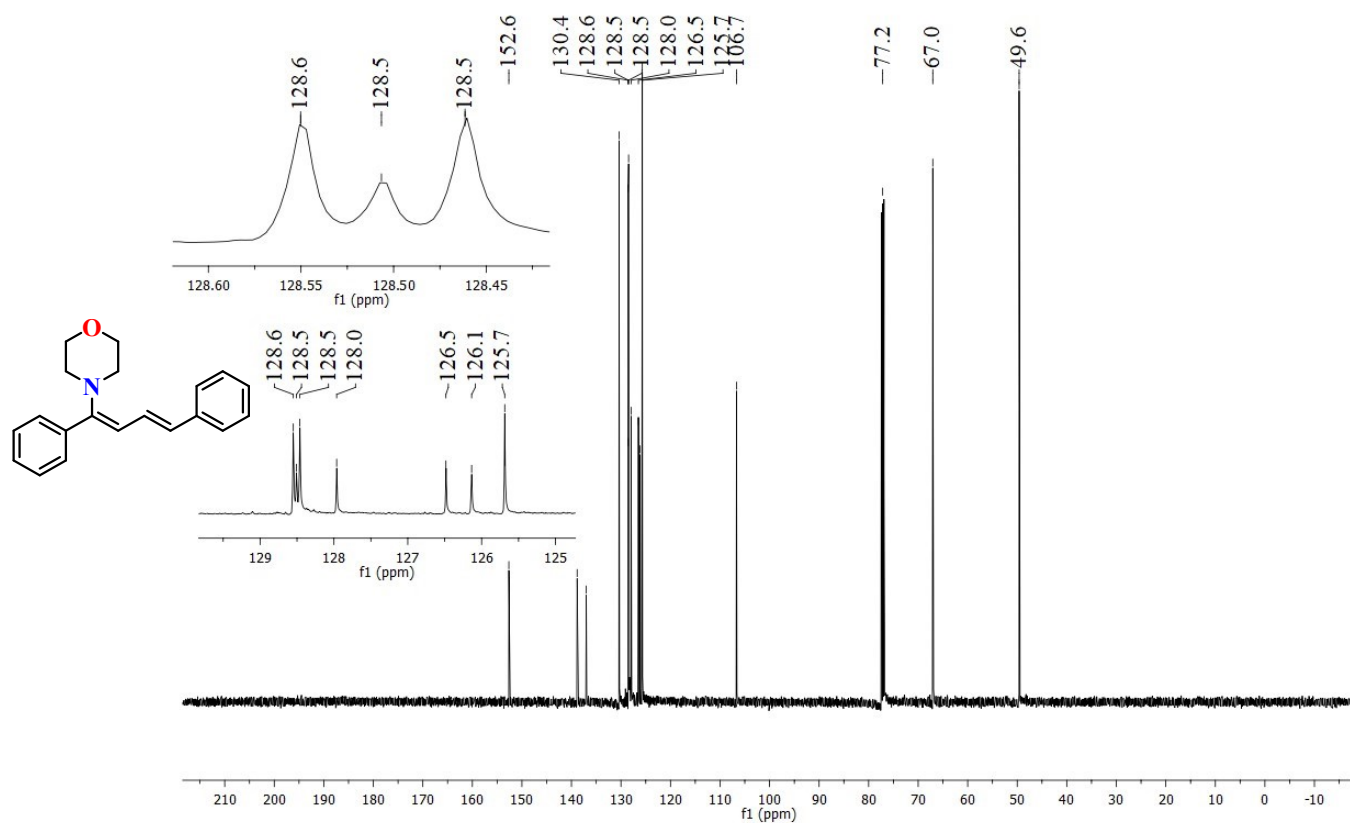

**Figure S102.**  $^{13}\text{C}\{^1\text{H}\}$  NMR (25 °C, 125.7 MHz) spectrum of 1-aminodiene **23** in  $\text{CDCl}_3$ .

## Mechanistic evidence

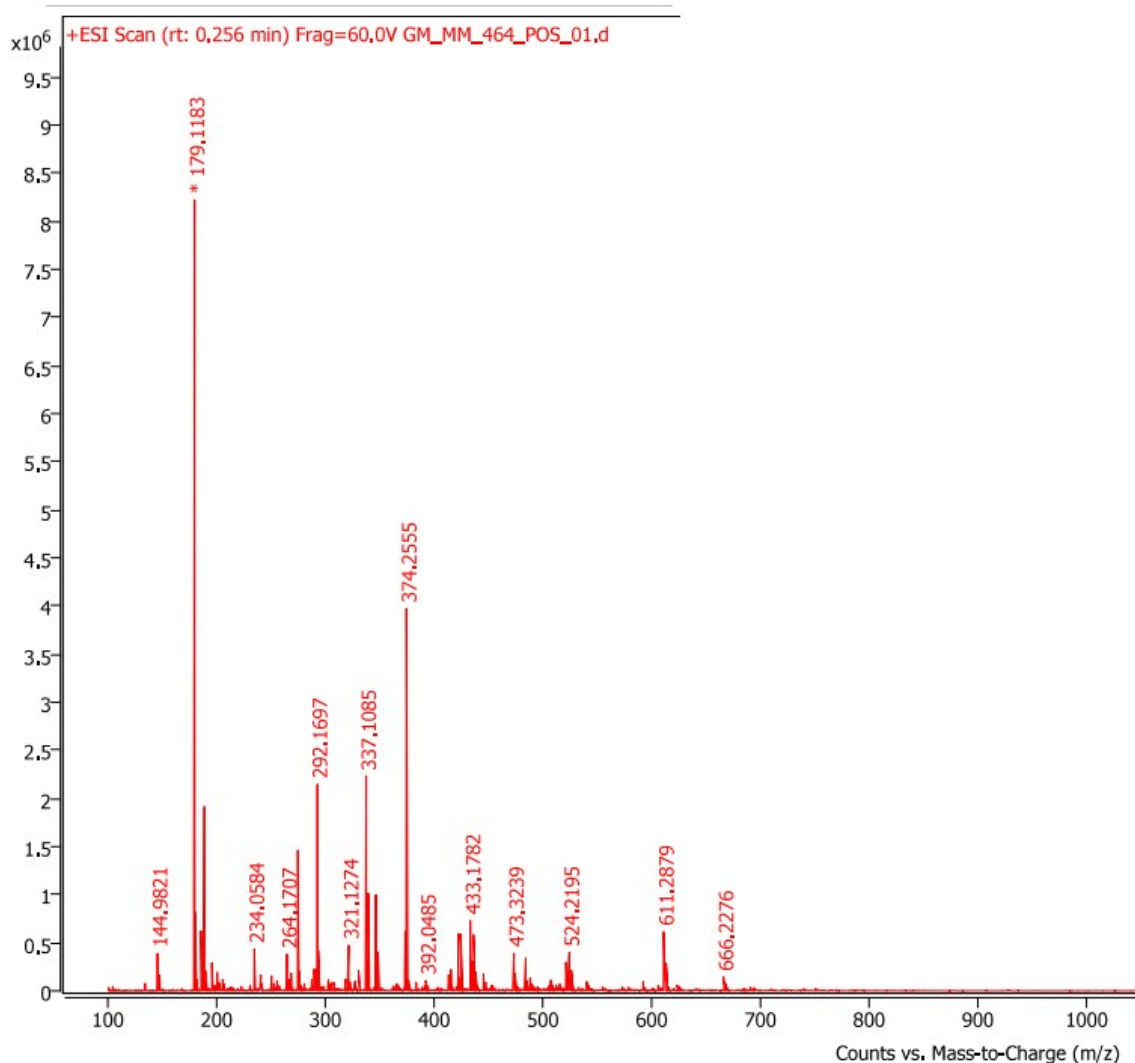

**Figure S103.** HRMS (ESI+) spectrum of the reaction mixture of copper(I) chloride complex **8**, morpholine and phenylacetylene (1:1:4 equiv.) in 1 mL toluene at 110 °C for 1h. The peak at  $m/z$  392.0485 (calc. 392.0489) shows the formation of  $[\text{Cu}\{\text{C}_4\text{H}_3\text{N}-2-(\text{CH}_2\text{Me}_2\text{pz})-5-(\text{CH}_2\text{SO}_2\text{Ph})-\kappa^1-\text{N}\}]^+$ ; it can be the active catalyst as proposed in the mechanism. The peak at  $m/z$  292.1697 represents the product of the reaction.

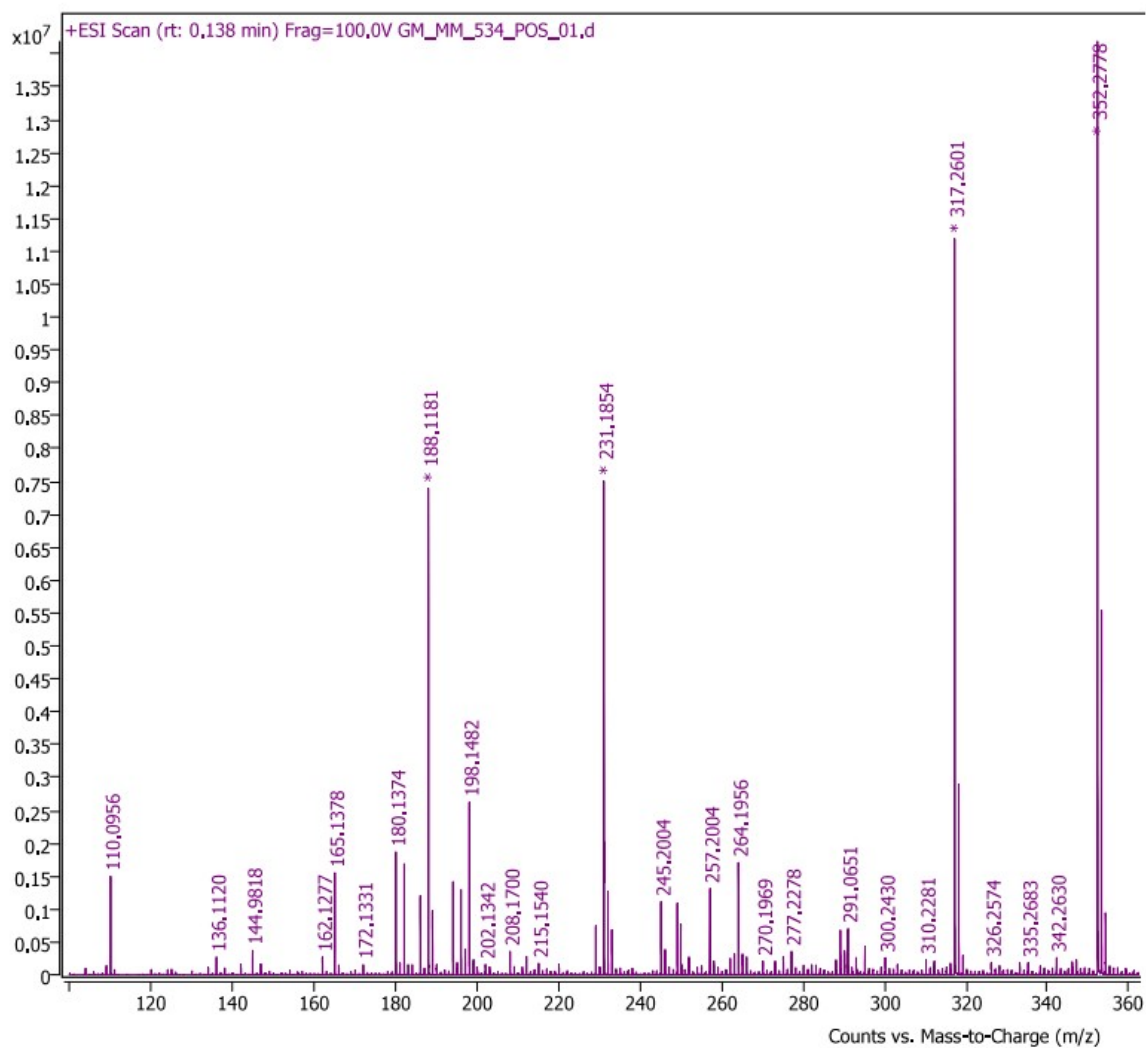

**Figure S104.** HRMS(ESI+) spectrum of the reaction mixture of bis(allyl)amine and pent-4-yn-1-ol (1:1) catalyzed by complex **5** (1 mol%) at 70 °C for 2 h under nitrogen atmosphere.



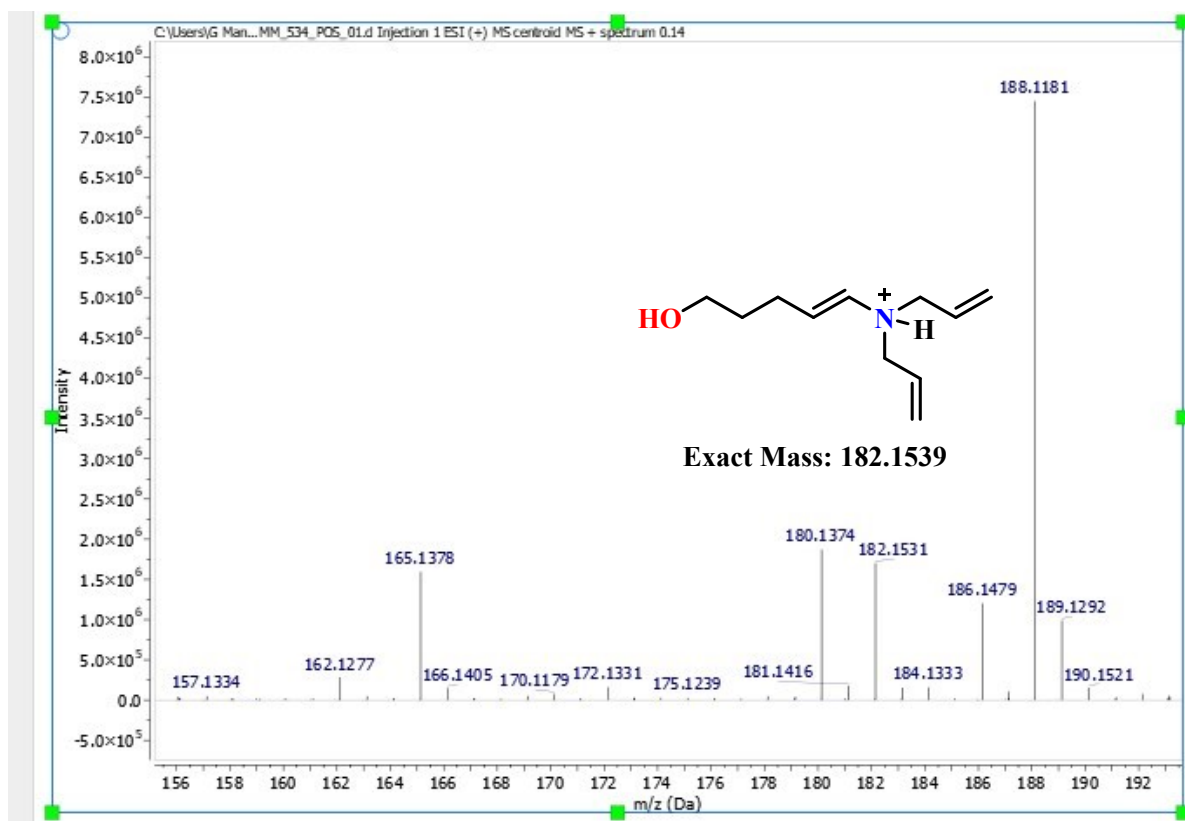

**Figure S105.** Partial HRMS(ESI+) spectrum of the reaction mixture of bis(allyl)amine and pent-4-yn-1-ol (1:1) catalyzed by complex **5** (1 mol%) at 70 °C for 2 h under nitrogen atmosphere.

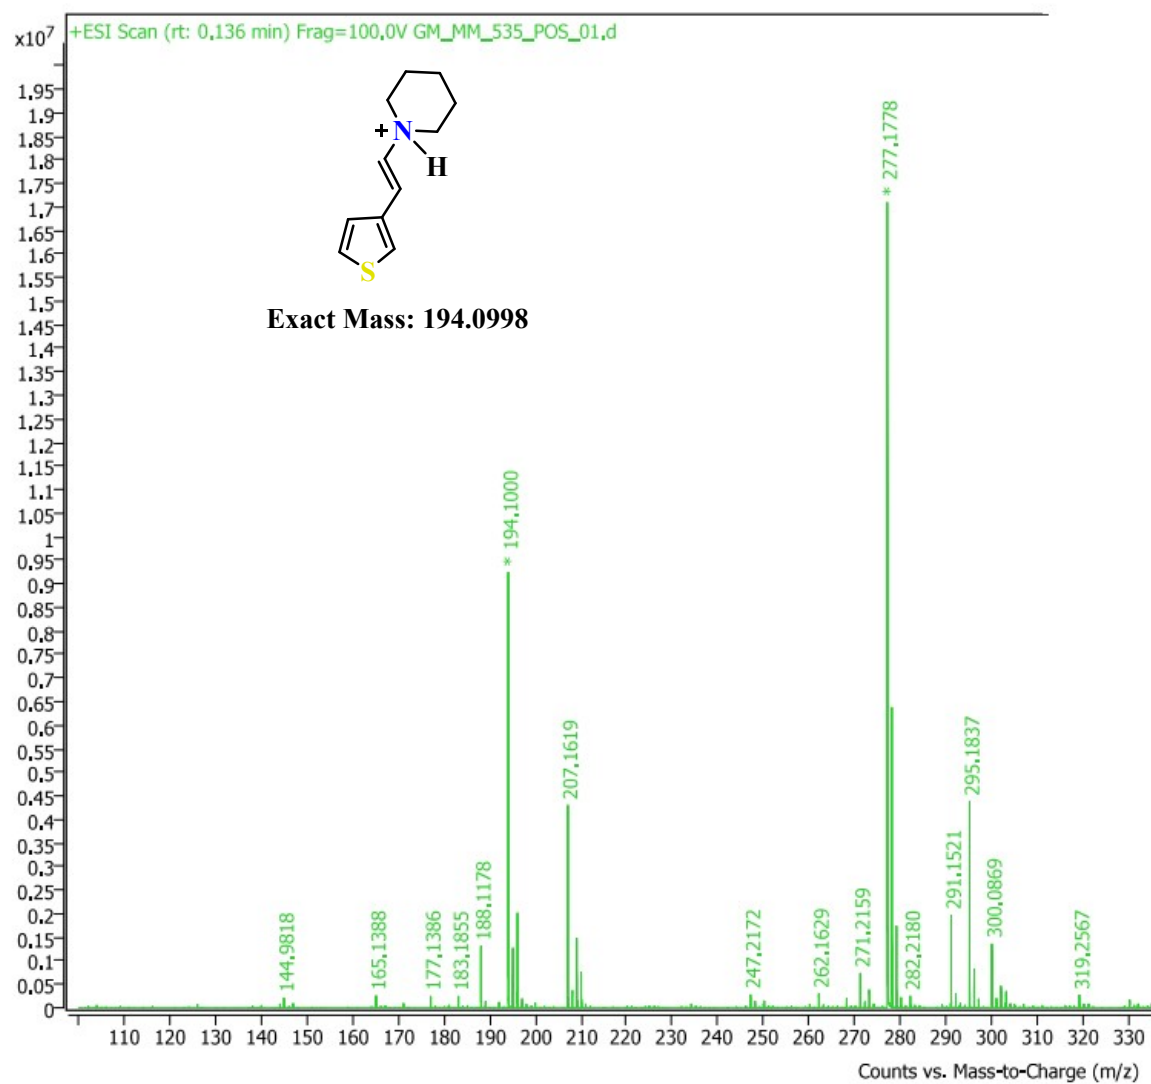

**Figure S106.** HRMS(ESI+) spectrum of the reaction mixture of bis(allyl)amine and 3-ethynylthiophene (1:1) catalyzed by complex **5** (1 mol%) at 70 °C for 2 h under nitrogen atmosphere.

# Target Screening Report

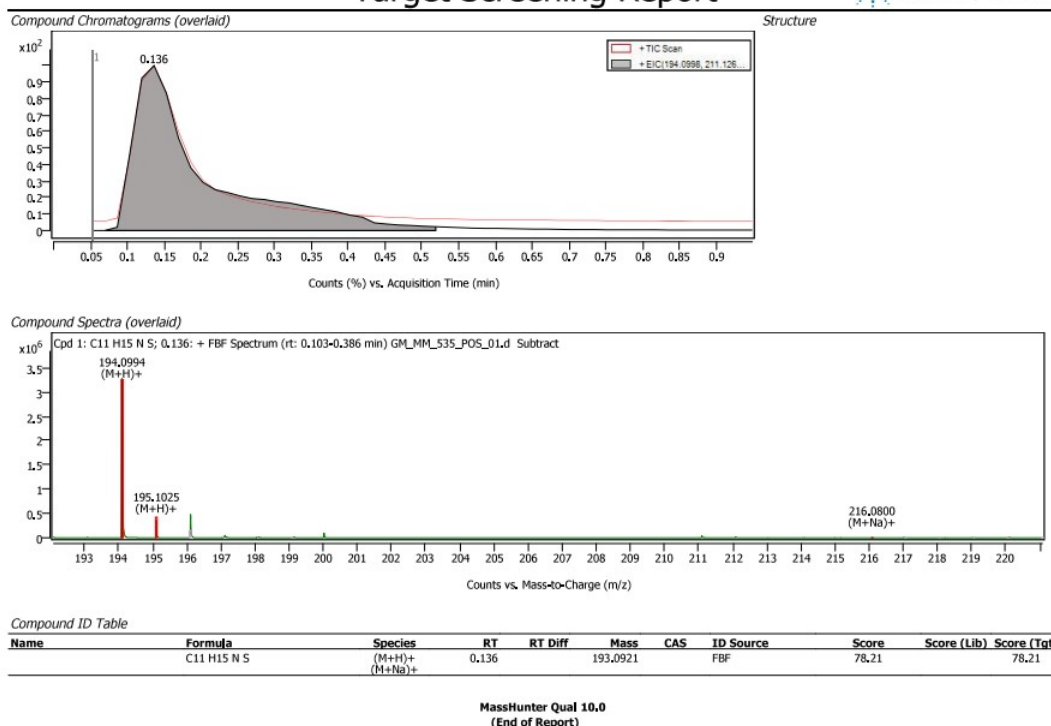

**Figure S107.** Target screening HRMS(ESI+) spectrum of the reaction mixture of bis(allyl)amine and 3-ethynylthiophene (1:1) catalyzed by complex **5** (1 mol%) at 70 °C for 2 h under nitrogen atmosphere.

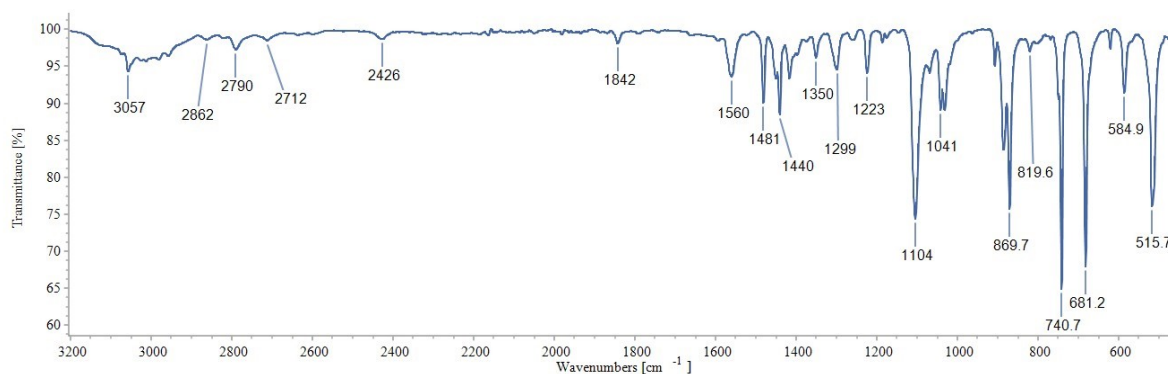

**Figure S108.** ATR spectrum of the morpholinium copper(I) salt  $[C_4H_{10}NO]_4^+[Cu_2Cl_6]^{4-}$ .

## For NMR yields

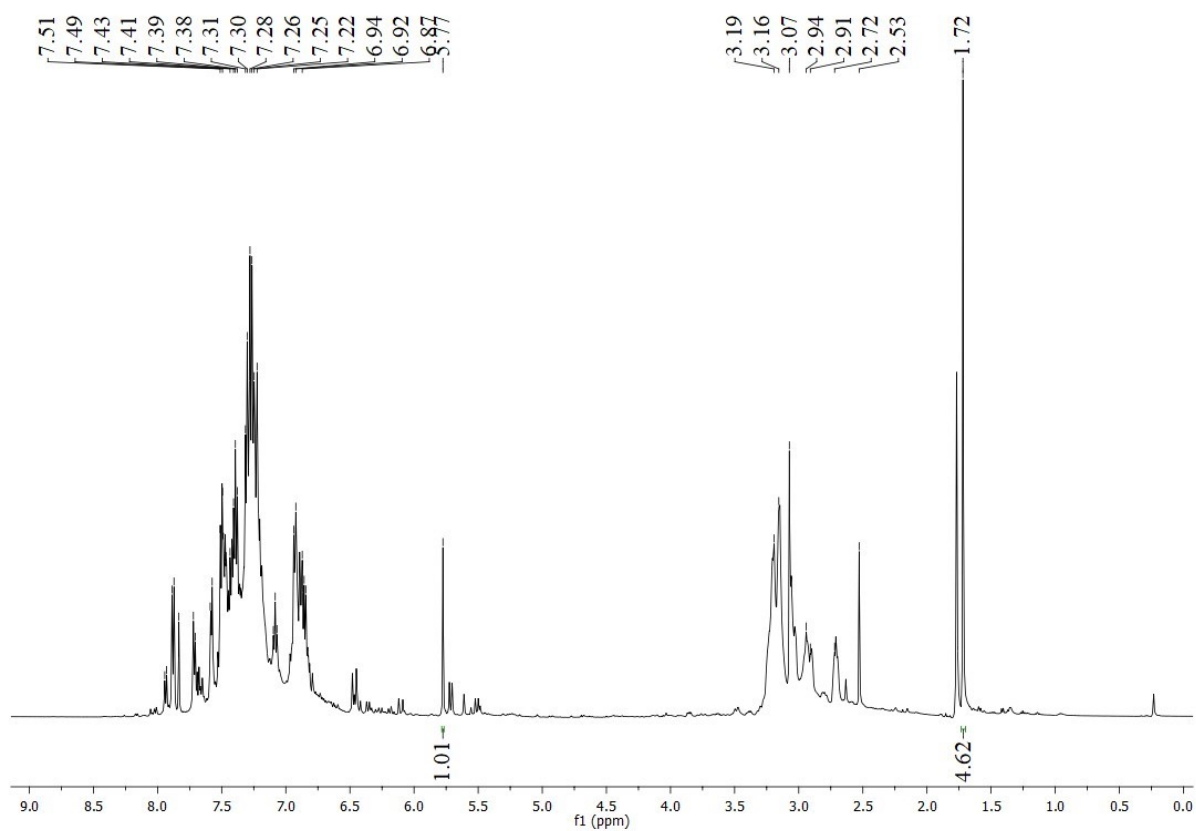

**Figure S109.** The  $^1\text{H}$  NMR (25 °C, 500 MHz) spectrum of the catalytic reaction mixture obtained after the reaction between *N*-phenylpiperazine and PhCCH in the presence of  $[\text{Cu}(\text{CH}_3\text{CN})_4]\text{BF}_4$  (10 mol%) at 110 °C for 24 h. 1,1,2,2-Tetrachloroethane was used as an internal standard ( $\delta$  5.77 ppm). The yield of tetrasubstituted propargylamine **17a** is 92%.

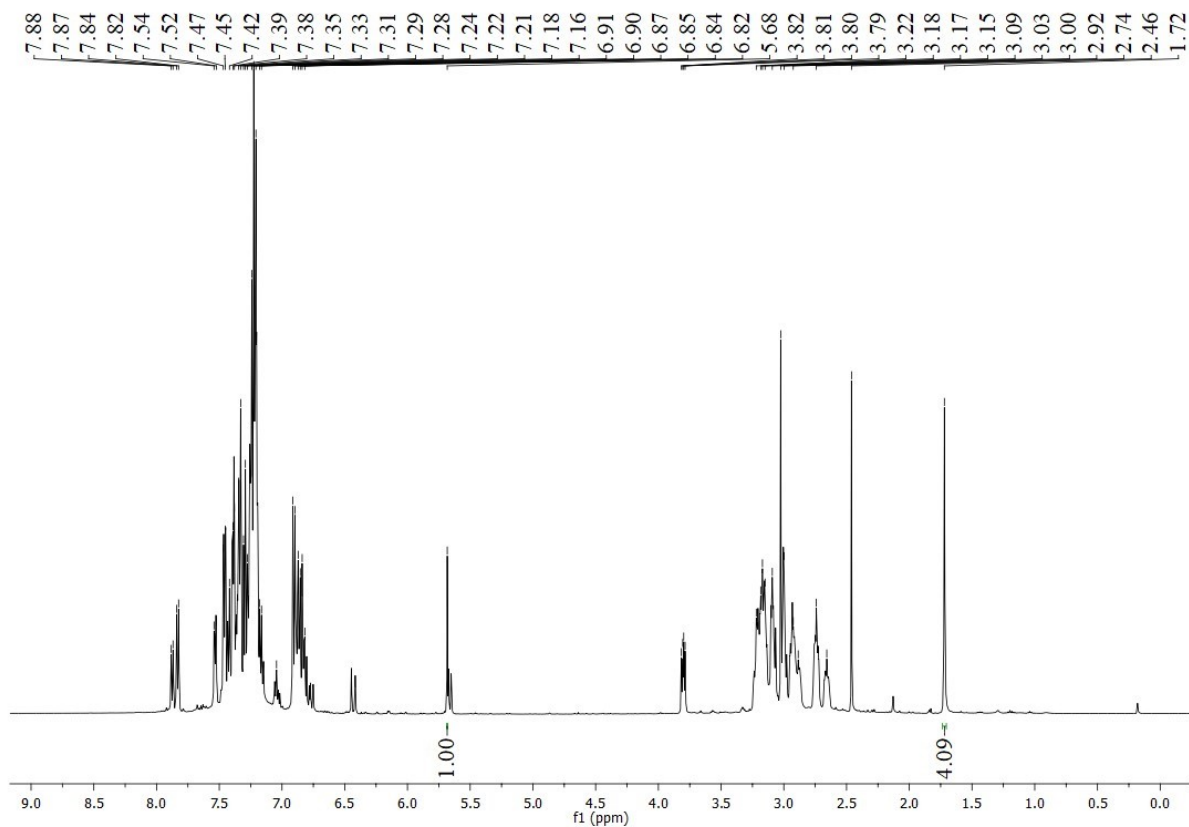

**Figure S110.** The  $^1\text{H}$  NMR (25 °C, 500 MHz) spectrum of the catalytic reaction mixture obtained after the reaction between *N*-phenylpiperazine and PhCCH in the presence of complex **11b** (1 mol%) at 110 °C for 12 h. 1,1,2,2-Tetrachloroethane was used as an internal standard ( $\delta$  5.77 ppm). The yield of tetrasubstituted propargylamine **17a** is 82%.

## 5. References

---

1. Sheldrick, G. M. *Acta Cryst. Sect. A: Found. Crystallogr.*, **2015**, *71*, 3.
2. Sheldrick, G. M. *Acta Cryst. Sect. C: Struct. Chem.*, **2015**, *71*, 3.
3. van der Sluis, P.; Spek, A. L. BYPASS: an Effective Method for the Refinement of Crystal Structures Containing Disordered Solvent Regions. *Acta Cryst. A* **1990**, *46*, 194–201.
4. Pierce, C. J.; Yoo, H.; Larsen, C. H. A Unique Route to Tetrasubstituted Propargylic Amines by Catalytic Markovnikov Hydroamination–Alkynylation. *Adv. Synth. Catal.* **2013**, *355*, 3586–3590.
5. Zhou, L.; Bohle, D. S.; Jiang, H. F.; Li, C. J. Synthesis of Propargylamines by a Copper-Catalyzed Tandem Anti-Markovnikov Hydroamination and Alkyne Addition. *Synlett.* **2009**, *6*, 937-940.
6. Liu, Q.; Burton, D. J. A Facile Synthesis of Diynes. *Tetrahedron Lett.* **1997**, *38*, 4371-4374.
7. Aliaga, M. J.; Ramón, D. J.; Yus, M. Impregnated copper on magnetite: an efficient and green catalyst for the multicomponent preparation of propargylamines under solvent free conditions. *Org. Biomol. Chem.* **2010**, *8*, 43-46.
8. Cai, Y.; Tang, X.; Ma, S. Identifying a Highly Active Copper Catalyst for KA<sup>2</sup> Reaction of Aromatic Ketones. *Chem. Eur. J.* **2016**, *22*, 2266–2269.
9. Palchak, Z. L.; Lussier, D. J.; Pierce, C. J.; Yoo, H.; Larsen, C. H. Catalytic Tandem Markovnikov Hydroamination–Alkynylation and Markovnikov Hydroamination–Hydrovinylation. *Adv. Synth. Catal.* **2015**, *357*, 539-548.
